# Supplementary material for: Electrochemical enantioselective dihydroxylation reaction of N-alkenyl nucleobases for the construction of chiral acyclic nucleosides
Source: Royal Society of Chemistry journal article supplement (doi:10.1039/d2qo00971d), 2022-01-01
Supplement: d2qo00971d1.pdf [file d2qo00971d1.pdf]

## Supporting Information for

# Electrochemical Enantioselective Dihydroxylation Reaction of *N*-Alkenyl nucleobases for the Construction of Chiral Acyclic Nucleosides

Qi-Ying Zhang<sup>\*a</sup>, Pei-Xian Lu<sup>a</sup>, Song-Lin Wang<sup>b</sup>, Lu-Xin Li<sup>a</sup>, Gui-Rong Qu<sup>a</sup>, and Hai-Ming Guo<sup>\*a</sup>

<sup>a</sup>NMPA Key Laboratory for Research and Evaluation of Innovative Drug, Key Laboratory of Green Chemical Media and Reactions, Ministry of Education, Collaborative Innovation Center of Henan Province for Green Manufacturing of Fine Chemicals, School of Chemistry and Chemical Engineering, Henan Normal University, Xinxiang, Henan 453007, China.

<sup>b</sup>School of Chemistry and Chemical Engineering, Henan Institute of Science and Technology, Xinxiang, Henan 453003, China.

E-mail: zhangqiying@htu.edu.cn; ghm@htu.edu.cn

## Table of Contents

|                                                                                                                            |     |
|----------------------------------------------------------------------------------------------------------------------------|-----|
| 1. General information.....                                                                                                | 2   |
| 2. Experimental Section .....                                                                                              | 2   |
| 2.1 Synthesis methods for starting materials <sup>[1-4]</sup> .....                                                        | 2   |
| 2.2 Graphical guide for the electrochemical set-up.....                                                                    | 3   |
| 2.3 Optimization of reaction conditions.....                                                                               | 3   |
| 2.4 General procedure for electrochemical enantioselective dihydroxylation reaction of <i>N</i> -alkenyl nucleobases ..... | 4   |
| 2.5 Scale-up synthesis of model product 2a.....                                                                            | 5   |
| 3. The X-ray data of 2a .....                                                                                              | 5   |
| 4. The analytical and spectral characterization data.....                                                                  | 7   |
| 5. Copies of <sup>1</sup> H and <sup>13</sup> C NMR spectra.....                                                           | 26  |
| 6. Copies of HPLC spectra for racemic and chiral products .....                                                            | 77  |
| 7. References.....                                                                                                         | 105 |

## 1. General information

All the electrochemical oxidations were performed in an undivided cell equipped with carbon felt anode (1.5 cm × 1.5 cm × 0.3 cm) and platinum cathode (1.5 cm × 1.5 cm × 0.2 mm) unless otherwise noted. Source (HSPY-600) was purchased from Beijing Hansheng Puyuan Technology Co., LTD. All commercial reagents were purchased from TCI, Sigma-Aldrich, laajoo and Adamas-beta of the highest purity grade and used without further purification. <sup>1</sup>H NMR and <sup>13</sup>C NMR spectra were recorded on Bruker Avance III HD 600 or Avance 400 MHz spectrometer. Chemical shifts are recorded in ppm relative to tetramethylsilane with the solvent resonance as the internal standard. Data are represented as follows: chemical shift, multiplicity (s = singlet, d = doublet, t = triplet, q = quartet, dd = doublet of doublets, m = multiplet), coupling constants (*J*) are in Hertz (Hz), and integration. Enantiomer excesses were determined by chiral HPLC analysis on Chiralcel IA/ ID/OD-H/IC in comparison with the authentic racemates. Chiral HPLC analysis was recorded on Thermo Scientific Dionex Ultimate 3000 and Agilent Technologies 1260 Infinity. Optical rotations were recorded on Autopol Automatic Polarimeter, and were reported as follows: [ $\alpha$ ]<sub>D</sub><sup>T</sup> (c: g/100 mL, in CH<sub>3</sub>OH). High resolution mass spectra (HRMS) were recorded on an ABI/Sciex QStar Mass Spectrometer (ESI). Single crystal X-ray crystallography data were obtained on Supernova Atlas S2 CCD detector. Melting point (m.p.) data were obtained on X-5 micro melting point apparatus. For column chromatography, silica gel (200-300 mesh) was used as the stationary phase.

## 2. Experimental Section

### 2.1 Synthesis methods for starting materials<sup>[1-4]</sup>

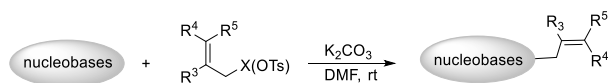

To a mixture of nucleobases (10.0 mmol) and  $\text{K}_2\text{CO}_3$  (2.07 g, 15.0 mmol) in DMF (20.0 mL), the solution of alkenes compounds (12.0 mmol) was added. Then, the resulting mixture was stirred at rt until the starting materials were consumed as indicated by TLC analysis. Afterwards, the resulting mixture was filtered through a Celite pad, and the brine (40 mL) was added into the filtrate. Subsequently, the mixture was extracted with ethyl acetate (30.0 mL×3). The combined

organic layers were washed with brine (100.0 mL×2), dried over anhydrous Na<sub>2</sub>SO<sub>4</sub>, filtered, and evaporated under reduced pressure. The residue was purified by flash column chromatography with petroleum ether: ethyl acetate (2:1) as the eluant to afford the N-alkenyl nucleobases.

## 2.2 Graphical guide for the electrochemical set-up

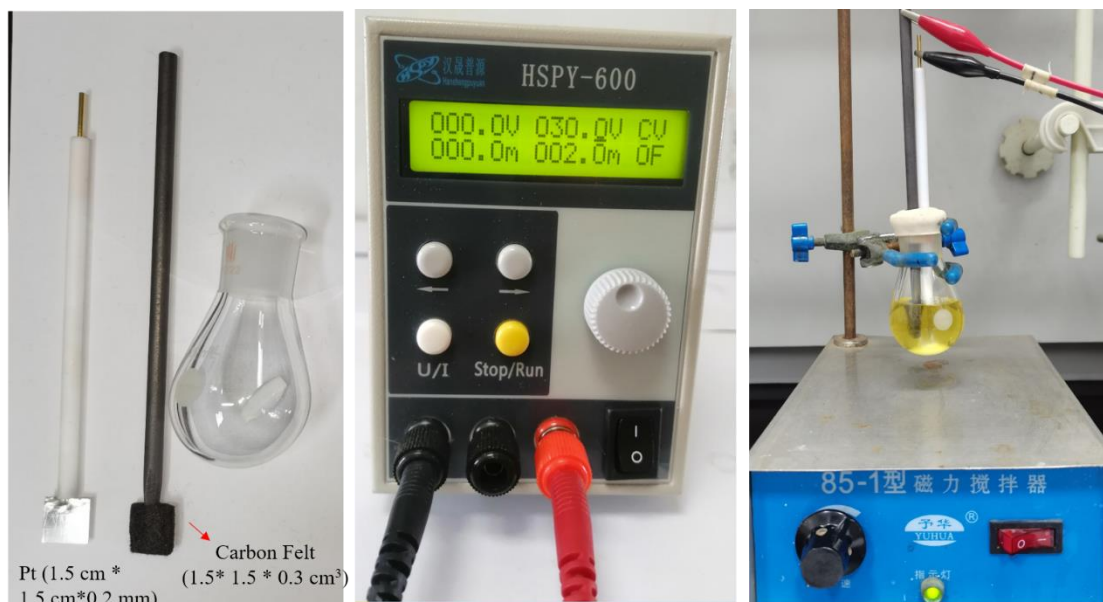

**Figure S1.** Reaction set-up for milligram-scale electrolysis. The anode is carbon felt electrode (1.5 cm × 1.5 cm × 0.3 cm) while the cathode is platinum electrode (1.5 cm × 1.5 cm × 0.2 mm).

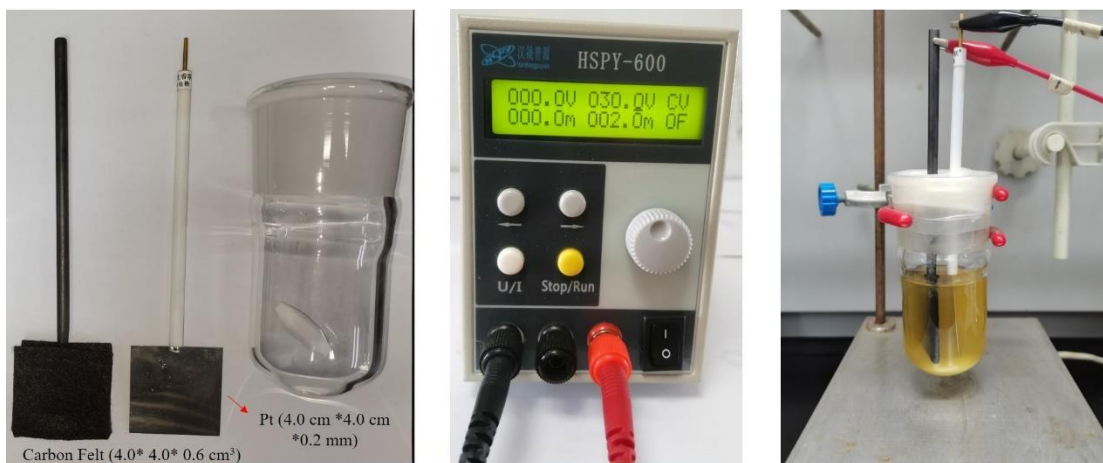

**Figure S2.** Reaction set-up for gram-scale electrolysis. The anode is carbon felt electrode (4.0 cm × 4.0 cm × 0.6 cm) while the cathode is platinum electrode (4.0 cm × 4.0 cm × 0.2 mm).

## 2.3 Optimization of reaction conditions

Table S1. Screening of Reaction Conditions<sup>a</sup>

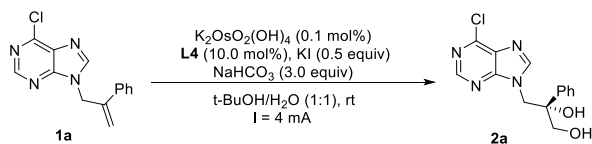

| entry | anode                                       | cathode                       | yield (%) <sup>b</sup> | ee (%) <sup>c</sup> |
|-------|---------------------------------------------|-------------------------------|------------------------|---------------------|
| 1     | Pt (1.0*1.0 cm <sup>2</sup> )               | Pt (1.0*1.0 cm <sup>2</sup> ) | 33                     | 89                  |
| 2     | Pt (1.5*1.0 cm <sup>2</sup> )               | Pt (1.0*1.0 cm <sup>2</sup> ) | 49                     | 90                  |
| 3     | Pt (1.5*1.5 cm <sup>2</sup> )               | Pt (1.0*1.0 cm <sup>2</sup> ) | 56                     | 91                  |
| 4     | Pt (1.5*1.5 cm <sup>2</sup> )               | Pt (1.5*1.5 cm <sup>2</sup> ) | 66                     | 91                  |
| 5     | Graphite Felt (1.5*1.5 cm <sup>2</sup> )    | Pt (1.5*1.5 cm <sup>2</sup> ) | 94                     | 96                  |
| 6     | RVC <sup>d</sup> (1.5*1.5 cm <sup>2</sup> ) | Pt (1.5*1.5 cm <sup>2</sup> ) | 56                     | 92                  |
| 7     | Carbon Rod                                  | Pt (1.5*1.5 cm <sup>2</sup> ) | 35                     | 92                  |
| 8     | Ni foam (1.5*1.5 cm <sup>2</sup> )          | Pt (1.5*1.5 cm <sup>2</sup> ) | n.r.                   | n.r.                |
| 9     | Carbon Rod                                  | Carbon Rod                    | n.r.                   | n.r.                |

<sup>a</sup>Unless otherwise noted, the reaction conditions were: **1a** (1.0 mmol), K<sub>2</sub>OsO<sub>2</sub>(OH)<sub>4</sub> (0.1 mol%), **L4** (DHQD)<sub>2</sub>PHAL (10.0 mol%), KI (0.5 equiv), NaHCO<sub>3</sub> (3.0 equiv), t-BuOH/H<sub>2</sub>O (20 mL, 1:1), constant current of 4 mA, rt, the reaction time of 40 h, in an undivided cell. <sup>b</sup>Isolated yields.

<sup>c</sup>Determined by chiral HPLC analysis. <sup>d</sup>RVC: Reticulated Vitreous Carbon

## 2.4 General procedure for electrochemical enantioselective dihydroxylation reaction of N-alkenyl nucleobases

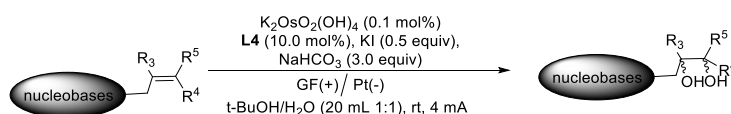

The electrocatalysis was carried out in an undivided cell under air with carbon felt anode (1.5 cm × 1.5 cm × 0.3 cm) and platinum cathode (1.5 cm × 1.5 cm × 0.2 mm). The N-alkenyl nucleobases (1.0 mmol), K<sub>2</sub>OsO<sub>2</sub>(OH)<sub>4</sub> (0.001 mmol), **L4** (0.1 mmol), KI (0.5 mmol), NaHCO<sub>3</sub> (3.0 mmol) were dissolved in t-BuOH/H<sub>2</sub>O (20 mL, 1:1). Electrocatalysis was performed at rt with a constant current of 4.0 mA maintained for 40 h. After the reaction, the electrodes were washed with ethyl acetate (3×10.0 mL). The mixture was dried over anhydrous Na<sub>2</sub>SO<sub>4</sub>, filtered, and concentrated in vacuo. The resulting residue was purified by flash column chromatography on silica gel with CH<sub>2</sub>Cl<sub>2</sub>/MeOH (40/1) to afford the corresponding products.

## 2.5 Scale-up synthesis of model product 2a

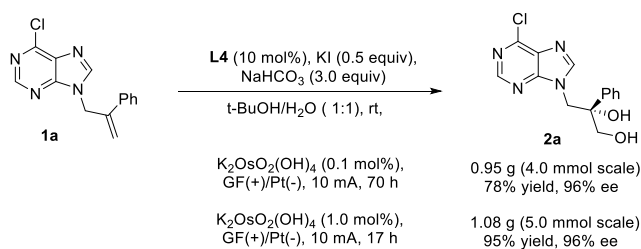

The electrocatalysis was carried out in an undivided cell under air with carbon felt anode (4.0 cm × 4.0 cm × 0.6 cm) and platinum cathode (4.0 cm × 4.0 cm × 0.2 mm). To one vial, **1a** (4.0 mmol), K<sub>2</sub>OsO<sub>2</sub>(OH)<sub>4</sub> (0.004 mmol), **L4** (0.4 mmol), KI (2.0 mmol), NaHCO<sub>3</sub> (12.0 mmol) and t-BuOH/H<sub>2</sub>O (80.0 mL, 1:1) were added. To another vial, **1a** (5.0 mmol), K<sub>2</sub>OsO<sub>2</sub>(OH)<sub>4</sub> (0.05 mmol), **L4** (0.5 mmol), KI (2.5 mmol), NaHCO<sub>3</sub> (15.0 mmol) and t-BuOH/H<sub>2</sub>O (100.0 mL, 1:1) were added. Electrocatalysis was performed at rt with a constant current of 10.0 mA until the starting materials were consumed as indicated by TLC analysis. After these reactions, the electrodes were washed with ethyl acetate (3×30.0 mL). The mixture was dried over anhydrous Na<sub>2</sub>SO<sub>4</sub>, filtered, and concentrated in vacuo. The resulting residue was purified by flash column chromatography on silica gel with CH<sub>2</sub>Cl<sub>2</sub>/MeOH (40/1) afforded the product **2a**.

## 3. The X-ray data of 2a

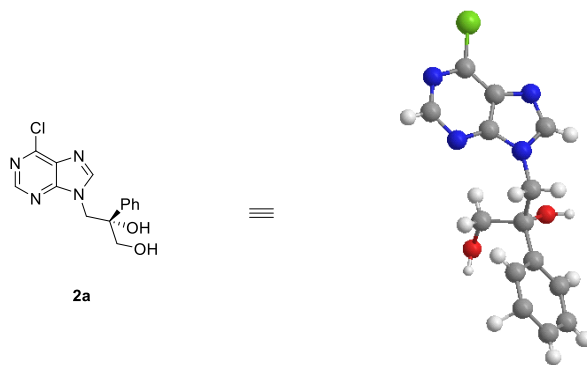

The chiral product of **2a** was recrystallized by ethyl acetate/ petroleum ether/methanol (30/10/1). CCDC 2150120 (**2a**) contains the supplementary crystallographic data for this paper. These data can be obtained free of charge from The Cambridge Crystallographic Data Centre via [www.ccdc.cam.ac.uk/data\\_request/cif](http://www.ccdc.cam.ac.uk/data_request/cif).

**Table 1 Crystal data and structure refinement for 2a.**

|                     |                                                                 |
|---------------------|-----------------------------------------------------------------|
| Identification code | LPX-20211213                                                    |
| Empirical formula   | C <sub>14</sub> H <sub>16</sub> ClN <sub>4</sub> O <sub>4</sub> |

|                                                |                                                                |
|------------------------------------------------|----------------------------------------------------------------|
| Formula weight                                 | 339.76                                                         |
| Temperature/K                                  | 293 (2)                                                        |
| Crystal system                                 | monoclinic                                                     |
| Space group                                    | P2 <sub>1</sub>                                                |
| a/Å                                            | 10.76520(10)                                                   |
| b/Å                                            | 6.84890(10)                                                    |
| c/Å                                            | 11.20770(10)                                                   |
| $\alpha/^\circ$                                | 90                                                             |
| $\beta/^\circ$                                 | 110.1070(10)                                                   |
| $\gamma/^\circ$                                | 90                                                             |
| Volume/Å <sup>3</sup>                          | 775.977(16)                                                    |
| Z                                              | 2                                                              |
| $\rho_{\text{calc}}/\text{g}/\text{cm}^3$      | 1.454                                                          |
| $\mu/\text{mm}^{-1}$                           | 2.427                                                          |
| F(000)                                         | 354.0                                                          |
| Crystal size/mm <sup>3</sup>                   | 0.01 × 0.01 × 0.01                                             |
| Radiation                                      | Cu K $\alpha$ ( $\lambda$ = 1.54184)                           |
| 2 $\Theta$ range for data collection/ $^\circ$ | 8.402 to 142.808                                               |
| Index ranges                                   | -13 ≤ h ≤ 13, -8 ≤ k ≤ 7, -13 ≤ l ≤ 13                         |
| Reflections collected                          | 18673                                                          |
| Independent reflections                        | 2824 [ $R_{\text{int}}$ = 0.0417, $R_{\text{sigma}}$ = 0.0195] |
| Data/restraints/parameters                     | 2824/1/216                                                     |
| Goodness-of-fit on F <sup>2</sup>              | 1.149                                                          |
| Final R indexes [ $I \geq 2\sigma(I)$ ]        | $R_1$ = 0.0435, $wR_2$ = 0.1066                                |
| Final R indexes [all data]                     | $R_1$ = 0.0436, $wR_2$ = 0.1067                                |
| Largest diff. peak/hole / e Å <sup>-3</sup>    | 0.31/-0.62                                                     |
| Flack parameter                                | 0.023(11)                                                      |

#### 4. The analytical and spectral characterization data

##### (1) The analytical and spectral characterization data of starting materials

###### 6-chloro-9-(2-phenylallyl)-9H-purine (1a)

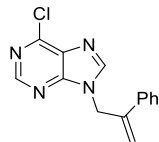

White solid, m.p. 87.0-88.5 °C, 1.48 g, 55% yield;  $^1\text{H}$  NMR (400 MHz,  $\text{CDCl}_3$ )  $\delta$  8.77 (s, 1H), 8.08 (s, 1H), 7.43-7.40 (m, 2H), 7.30-7.28 (m, 3H), 5.63 (s, 1H), 5.33 (s, 2H), 5.21 (s, 1H);  $^{13}\text{C}$  NMR (100 MHz,  $\text{CDCl}_3$ )  $\delta$  152.1, 151.8, 151.0, 145.1, 141.9, 136.9, 131.3, 128.81, 128.75, 126.0, 116.9, 47.5; HRMS (ESI-TOF): exact mass calcd for  $\text{C}_{14}\text{H}_{11}\text{ClN}_4$  ( $\text{M}+\text{H}$ ) $^+$  requires m/z 271.0745, found m/z 271.0741.

###### 6-bromo-9-(2-phenylallyl)-9H-purine (1b)

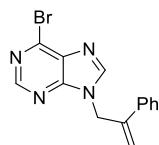

White solid, m.p. 106.7-108.6 °C, 2.01 g, 64% yield;  $^1\text{H}$  NMR (600 MHz,  $\text{CDCl}_3$ )  $\delta$  8.72 (s, 1H), 8.09 (s, 1H), 7.42-7.41 (m, 2H), 7.32-7.26 (m, 3H), 5.63 (s, 1H), 5.32 (s, 2H), 5.21 (s, 1H);  $^{13}\text{C}$  NMR (150 MHz,  $\text{CDCl}_3$ )  $\delta$  152.0, 150.6, 145.0, 143.1, 141.9, 136.9, 133.9, 128.84, 128.79, 126.0, 116.9, 47.6; HRMS (ESI-TOF): exact mass calcd for  $\text{C}_{14}\text{H}_{11}\text{BrN}_4$  ( $\text{M}+\text{H}$ ) $^+$  requires m/z 315.0240, found m/z 315.0245.

###### 9-(2-phenylallyl)-9H-purine (1c)

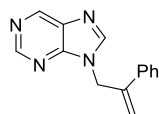

White solid, m.p. 61.9-64.0 °C, 1.26 g, 53% yield;  $^1\text{H}$  NMR (400 MHz,  $\text{CDCl}_3$ )  $\delta$  9.12 (s, 1H), 9.03 (s, 1H), 8.06 (s, 1H), 7.45-7.42 (m, 2H), 7.32-7.27 (m, 3H), 5.63 (s, 1H), 5.32 (s, 2H), 5.18 (s, 1H);  $^{13}\text{C}$  NMR (100 MHz,  $\text{CDCl}_3$ )  $\delta$  152.8, 151.4, 148.6, 145.1, 142.2, 137.1, 133.8, 128.8, 128.7, 126.0, 116.5, 46.8; HRMS (ESI-TOF): exact mass calcd for  $\text{C}_{14}\text{H}_{12}\text{N}_4$  ( $\text{M}+\text{H}$ ) $^+$  requires m/z 237.1135, found m/z 237.1137.

###### 6-methyl-9-(2-phenylallyl)-9H-purine (1d)

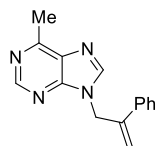

White solid, m.p. 66.5-67.2 °C, 0.78 g, 31% yield; **<sup>1</sup>H NMR** (400 MHz, CDCl<sub>3</sub>) δ 8.87 (s, 1H), 7.96 (s, 1H), 7.44-7.41 (m, 2H), 7.32-7.28 (m, 3H), 5.61 (s, 1H), 5.29 (s, 2H), 5.16 (s, 1H), 2.83 (s, 3H); **<sup>13</sup>C NMR** (100 MHz, CDCl<sub>3</sub>) δ 159.4, 152.6, 150.7, 143.7, 142.5, 137.3, 132.9, 128.9, 128.8, 126.1, 116.5, 47.1, 19.6; **HRMS** (ESI-TOF): exact mass calcd for C<sub>15</sub>H<sub>14</sub>N<sub>4</sub> (M+H)<sup>+</sup> requires m/z 251.1291, found m/z 251.1298.

#### 6-ethoxy-9-(2-phenylallyl)-9H-purine (1f)

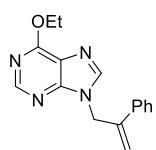

White solid, m.p. 29.2-32.1 °C, 1.54 g, 55% yield; **<sup>1</sup>H NMR** (600 MHz, CDCl<sub>3</sub>) δ 8.56 (s, 1H), 7.87 (s, 1H), 7.42 (d, *J* = 7.2 Hz, 2H), 7.30-7.26 (m, 3H), 5.59 (s, 1H), 5.27 (s, 2H), 5.12 (s, 1H), 4.67-4.63 (m, 2H), 1.50 (t, *J* = 7.2 Hz, 3H); **<sup>13</sup>C NMR** (150 MHz, CDCl<sub>3</sub>) δ 160.9, 152.3, 152.1, 142.5, 142.0, 137.3, 128.7, 128.6, 126.0, 121.2, 116.0, 63.2, 47.1, 14.5; **HRMS** (ESI-TOF): exact mass calcd for C<sub>16</sub>H<sub>16</sub>N<sub>4</sub>O (M+Na)<sup>+</sup> requires m/z 303.1216, found m/z 303.1209.

#### 6-(benzyloxy)-9-(2-phenylallyl)-9H-purine (1g)

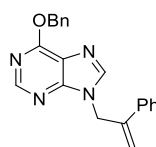

White solid, m.p. 102.9-104.3 °C, 2.01 g, 59% yield, **<sup>1</sup>H NMR** (600 MHz, CDCl<sub>3</sub>) δ 8.58 (s, 1H), 7.86 (s, 1H), 7.53 (d, *J* = 7.2 Hz, 2H), 7.43-7.41 (m, 2H), 7.36-7.34 (m, 2H), 7.31-7.27 (m, 4H), 5.66 (s, 2H), 5.59 (s, 1H), 5.26 (s, 2H), 5.12 (s, 1H); **<sup>13</sup>C NMR** (150 MHz, CDCl<sub>3</sub>) δ 160.7, 152.4, 152.2, 142.5, 142.2, 137.3, 136.2, 128.8, 128.7, 128.53, 128.45, 128.2, 126.1, 121.3, 116.2, 68.5, 47.2; **HRMS** (ESI-TOF): exact mass calcd for C<sub>21</sub>H<sub>18</sub>N<sub>4</sub>O (M+H)<sup>+</sup> requires m/z 343.1553, found m/z 343.1559.

#### N,N-dimethyl-9-(2-phenylallyl)-9H-purin-6-amine (1h)

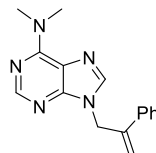

White solid, m.p. 126.5-127.5 °C, 1.45 g, 52% yield; **<sup>1</sup>H NMR** (600 MHz, CDCl<sub>3</sub>) δ 8.39 (s, 1H), 7.67 (s, 1H), 7.44 (d, *J* = 7.2 Hz, 2H), 7.31-7.27 (m, 3H), 5.58 (s, 1H), 5.20 (s, 2H), 5.08 (s, 1H), 3.51 (s, 6H); **<sup>13</sup>C NMR** (150 MHz, CDCl<sub>3</sub>) δ 155.0, 152.7, 150.7, 142.8, 138.2, 137.6, 128.7, 128.5, 126.1, 119.9, 115.7, 46.7, 38.6; **HRMS** (ESI-TOF): exact mass calcd for C<sub>16</sub>H<sub>17</sub>N<sub>5</sub> (M+H)<sup>+</sup> requires *m/z* 280.1557, found *m/z* 280.1556.

**N,N-diethyl-9-(2-phenylallyl)-9H-purin-6-amine (1i)**

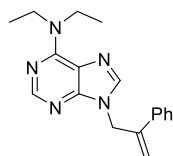

White solid, m.p. 85.7-87.6 °C, 1.84 g, 60% yield; **<sup>1</sup>H NMR** (600 MHz, CDCl<sub>3</sub>) δ 8.39 (s, 1H), 7.68 (s, 1H), 7.45 (d, *J* = 7.2 Hz, 2H), 7.32-7.26 (m, 3H), 5.58 (s, 1H), 5.19 (s, 2H), 5.07 (s, 1H), 3.97 (s, 4H), 1.28 (t, *J* = 7.2 Hz, 6H); **<sup>13</sup>C NMR** (150 MHz, CDCl<sub>3</sub>) δ 153.9, 152.8, 150.7, 142.8, 138.2, 137.6, 128.7, 128.4, 126.1, 119.4, 115.6, 46.6, 43.0, 13.6; **HRMS** (ESI-TOF): exact mass calcd for C<sub>18</sub>H<sub>21</sub>N<sub>5</sub> (M+H)<sup>+</sup> requires *m/z* 308.1870, found *m/z* 308.1864.

**tert-butyl (tert-butoxycarbonyl)(9-(2-phenylallyl)-9H-purin-6-yl)carbamate (1j)**

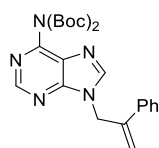

White solid, m.p. 86.4-89.0 °C, 1.80 g, 40% yield; **<sup>1</sup>H NMR** (400 MHz, CDCl<sub>3</sub>) δ 8.89 (s, 1H), 8.01 (s, 1H), 7.42-7.40 (m, 2H), 7.31-7.25 (m, 3H), 5.61 (s, 1H), 5.32 (s, 2H), 5.19 (s, 1H), 1.39 (s, 18H); **<sup>13</sup>C NMR** (100 MHz, CDCl<sub>3</sub>) δ 153.4, 152.2, 150.4, 150.3, 144.6, 142.4, 137.1, 128.8, 128.7, 128.6, 126.1, 116.6, 83.7, 47.3, 27.8; **HRMS** (ESI-TOF): exact mass calcd for C<sub>24</sub>H<sub>29</sub>N<sub>5</sub>O<sub>4</sub> (M+H)<sup>+</sup> requires *m/z* 452.2292, found *m/z* 452.2282.

**9-(2-phenylallyl)-6-(pyrrolidin-1-yl)-9H-purine (1k)**

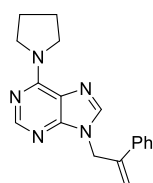

White solid, m.p. 177.7-181.6 °C, 2.01 g, 53% yield; **<sup>1</sup>H NMR** (400 MHz, CDCl<sub>3</sub>) δ 8.40 (s, 1H), 7.67 (s, 1H), 7.46-7.44 (m, 2H), 7.33-7.25 (m, 3H), 5.58 (s, 1H), 5.21 (s, 2H), 5.08 (s, 1H), 4.14 (s, 2H), 3.76 (s, 2H), 2.02 (s, 4H); **<sup>13</sup>C NMR** (100 MHz, CDCl<sub>3</sub>) δ 153.2, 153.1, 150.3, 142.9, 138.7,

137.6, 128.8, 128.5, 126.1, 120.1, 115.7, 46.7, 26.3, 24.4; **HRMS** (ESI-TOF): exact mass calcd for  $C_{18}H_{19}N_5$  ( $M+H$ )<sup>+</sup> requires  $m/z$  306.1713, found  $m/z$  306.1714.

**6-phenyl-9-(2-phenylallyl)-9H-purine (1l)**

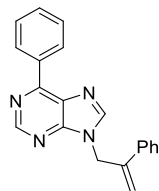

White solid, m.p. 123.8-125.4 °C, 1.03 g, 33% yield; **<sup>1</sup>H NMR** (600 MHz,  $CDCl_3$ )  $\delta$  9.06 (s, 1H), 8.78-8.77 (m, 2H), 8.06 (s, 1H), 7.56-7.50 (m, 3H), 7.46-7.45 (m, 2H), 7.33-7.28 (m, 3H), 5.63 (s, 1H), 5.34 (s, 2H), 5.19 (s, 1H); **<sup>13</sup>C NMR** (150 MHz,  $CDCl_3$ )  $\delta$  155.0, 152.7, 152.6, 144.3, 142.5, 137.4, 135.7, 131.1, 130.9, 129.9, 128.9, 128.8, 126.1, 116.5, 47.1; **HRMS** (ESI-TOF): exact mass calcd for  $C_{20}H_{16}N_4$  ( $M+H$ )<sup>+</sup> requires  $m/z$  313.1448, found  $m/z$  313.1493.

**6-(naphthalen-1-yl)-9-(2-phenylallyl)-9H-purine (1m)**

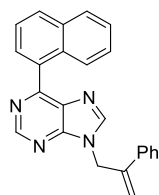

White solid, m.p. 108.8-109.9 °C, 1.41 g, 39% yield; **<sup>1</sup>H NMR** (600 MHz,  $CDCl_3$ )  $\delta$  9.19 (s, 1H), 8.30 (d,  $J$  = 7.2 Hz, 1H), 8.05-8.03 (m, 2H), 7.99 (d,  $J$  = 8.4 Hz, 1H), 7.92-7.91 (m, 1H), 7.62 (t,  $J$  = 6.6, 1H), 7.52-7.47 (m, 4H), 7.35-7.29 (m, 3H), 5.63 (s, 1H), 5.33 (s, 2H), 5.19 (s, 1H); **<sup>13</sup>C NMR** (150 MHz,  $CDCl_3$ )  $\delta$  158.0, 152.4, 144.7, 142.3, 137.3, 134.1, 132.5, 132.4, 131.1, 130.7, 130.0, 128.8, 128.7, 128.5, 126.8, 126.10, 126.08, 125.8, 125.1, 116.4, 47.0; **HRMS** (ESI-TOF): exact mass calcd for  $C_{24}H_{18}N_4$  ( $M+H$ )<sup>+</sup> requires  $m/z$  363.1604, found  $m/z$  363.1603.

**2,6-dichloro-9-(2-phenylallyl)-9H-purine (1n)**

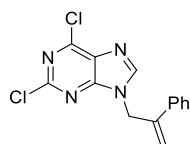

White solid, m.p. 114.8-115.6 °C, 1.31 g, 43% yield; **<sup>1</sup>H NMR** (600 MHz,  $CDCl_3$ )  $\delta$  8.06 (s, 1H), 7.41-7.39 (m, 2H), 7.32-7.28 (m, 3H), 5.65 (s, 1H), 5.29 (s, 2H), 5.24 (s, 1H); **<sup>13</sup>C NMR** (150 MHz,  $CDCl_3$ )  $\delta$  153.1, 153.0, 151.6, 145.7, 141.5, 136.6, 130.4, 128.84, 128.82, 125.9, 117.3, 47.7; **HRMS** (ESI-TOF): exact mass calcd for  $C_{14}H_{10}Cl_2N_4$  ( $M+H$ )<sup>+</sup> requires  $m/z$  305.0355, found  $m/z$

305.0346.

**tert-butyl (6-chloro-9-(2-phenylallyl)-9H-purin-2-yl)carbamate (1o)**

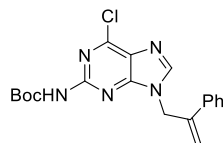

White solid, 149.5-151.9 °C, 2.50 g, 65% yield; **<sup>1</sup>H NMR** (400 MHz, CDCl<sub>3</sub>) δ 7.88 (s, 1H), 7.62 (s, 1H), 7.46-7.44 (m, 2H), 7.33-7.27 (m, 3H), 5.65 (s, 1H), 5.26-5.25 (m, 3H), 1.56 (s, 9H); **<sup>13</sup>C NMR** (100 MHz, CDCl<sub>3</sub>) δ 153.0, 152.6, 151.3, 150.3, 144.1, 142.1, 137.0, 128.9, 128.8, 127.6, 126.2, 117.2, 81.8, 47.5, 28.3; **HRMS** (ESI-TOF): exact mass calcd for C<sub>19</sub>H<sub>20</sub>ClN<sub>5</sub>O<sub>2</sub> (M+Na)<sup>+</sup> requires m/z 408.1198, found m/z 408.1208.

**1,3-dimethyl-9-(2-phenylallyl)-3,9-dihydro-1H-purine-2,6-dione (1p)**

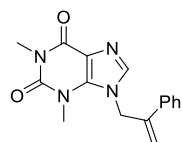

White solid, m.p. 112.3-114.3 °C, 1.94 g, 49% yield; **<sup>1</sup>H NMR** (400 MHz, CDCl<sub>3</sub>) δ 7.49 (s, 1H), 7.44-7.42 (m, 2H), 7.35-7.29 (m, 3H), 5.55 (s, 1H), 5.38 (s, 2H), 5.12 (s, 1H), 3.55 (d, *J* = 1.2 Hz, 3H), 3.41 (d, *J* = 1.2 Hz, 3H); **<sup>13</sup>C NMR** (100 MHz, CDCl<sub>3</sub>) δ 155.4, 151.8, 148.7, 143.1, 141.3, 137.5, 128.9, 128.7, 126.3, 116.3, 107.0, 50.2, 29.9, 28.1; **HRMS** (ESI-TOF): exact mass calcd for C<sub>16</sub>H<sub>16</sub>N<sub>4</sub>O<sub>2</sub> (M+Na)<sup>+</sup> requires m/z 319.1165, found m/z 319.1162.

**6-chloro-9-(2-methylallyl)-9H-purine (1q)**

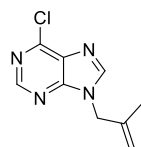

Yellow oil, 1.00 g, 48% yield; **<sup>1</sup>H NMR** (400 MHz, CDCl<sub>3</sub>) δ 8.64-8.62 (m, 1H), 8.07 (s, 1H), 4.91 (s, 1H), 4.75 (s, 2H), 4.68 (s, 1H), 1.64 (s, 3H); **<sup>13</sup>C NMR** (100 MHz, CDCl<sub>3</sub>) δ 152.0, 151.8, 150.8, 145.4, 139.0, 131.2, 114.6, 49.5, 19.9; **HRMS** (ESI-TOF): exact mass calcd for C<sub>9</sub>H<sub>9</sub>ClN<sub>4</sub> (M+H)<sup>+</sup> requires m/z 209.0589, found m/z 209.0598.

**6-chloro-9-(2-methylenebutyl)-9H-purine (1r)**

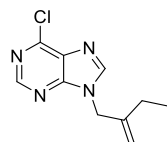

Colorless oil; 0.89 g, 40% yield; **<sup>1</sup>H NMR** (400 MHz, CDCl<sub>3</sub>) δ 8.72 (s, 1H), 8.09 (s, 1H), 5.01 (s, 1H), 4.84 (s, 2H), 4.79 (s, 1H), 2.00 (q, *J* = 7.6 Hz, 2H), 1.05 (t, *J* = 7.2 Hz, 3H); **<sup>13</sup>C NMR** (100 MHz, CDCl<sub>3</sub>) δ 152.2, 152.0, 151.2, 145.4, 144.8, 131.5, 112.8, 48.7, 26.4, 11.8; **HRMS** (ESI-TOF): exact mass calcd for C<sub>10</sub>H<sub>11</sub>ClN<sub>4</sub> (M+H)<sup>+</sup> requires *m/z* 223.0745, found *m/z* 223.0750.

**6-chloro-9-(2-cyclohexylallyl)-9H-purine (1s)**

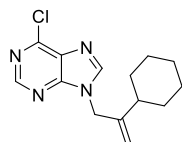

White solid, m.p. 61.4-62.7 °C, 0.74 g, 42% yield; **<sup>1</sup>H NMR** (400 MHz, CDCl<sub>3</sub>) δ 8.74 (s, 1H), 8.09 (s, 1H), 5.02 (s, 1H), 4.86 (s, 2H), 4.70 (s, 1H), 1.81-1.75 (m, 5H), 1.67-1.64 (m, 1H), 1.22-1.17 (m, 5H); **<sup>13</sup>C NMR** (100 MHz, CDCl<sub>3</sub>) δ 152.2, 152.1, 151.2, 148.7, 145.5, 131.5, 112.2, 47.7, 41.9, 32.2, 26.5, 26.1; **HRMS** (ESI-TOF): exact mass calcd for C<sub>14</sub>H<sub>17</sub>ClN<sub>4</sub> (M+H)<sup>+</sup> requires *m/z* 277.1215, found *m/z* 277.1215.

**2,6-dichloro-9-(2-methylallyl)-9H-purine (1t)**

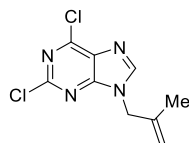

White solid, 66.6-67.1 °C, 1.52 g, 63% yield; **<sup>1</sup>H NMR** (400 MHz, CDCl<sub>3</sub>) δ 8.09 (s, 1H), 5.05 (s, 1H), 4.80 (s, 1H), 4.78 (s, 2H), 1.75 (s, 3H); **<sup>13</sup>C NMR** (100 MHz, CDCl<sub>3</sub>) δ 153.4, 153.3, 152.0, 146.0, 138.7, 130.7, 115.3, 49.8, 20.1; **HRMS** (ESI-TOF): exact mass calcd for C<sub>9</sub>H<sub>8</sub>Cl<sub>2</sub>N<sub>4</sub> (M+H)<sup>+</sup> requires *m/z* 243.0199, found *m/z* 243.0205.

**1-(2-phenylallyl)-1H-benzo[d]imidazole (1x)**

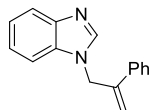

White solid, m.p. 106.4-108.4 °C, 1.24 g, 53% yield; **<sup>1</sup>H NMR** (400 MHz, CDCl<sub>3</sub>) δ 7.87 (s, 1H), 7.81-7.79 (m, 1H), 7.40-7.36 (m, 3H), 7.35-7.20 (m, 6H), 5.51 (s, 1H), 5.12 (s, 2H), 4.94 (s, 1H); **<sup>13</sup>C NMR** (100 MHz, CDCl<sub>3</sub>) δ 143.9, 143.4, 142.3, 138.0, 128.8, 128.6, 126.7, 126.0, 123.1, 122.3, 120.5, 115.3, 110.1, 48.7; **HRMS** (ESI-TOF): exact mass calcd for C<sub>16</sub>H<sub>14</sub>N<sub>2</sub> (M+H)<sup>+</sup> requires *m/z* 235.1230, found *m/z* 235.1237.

**6-chloro-9-cinnamyl-9H-purine (3a)**

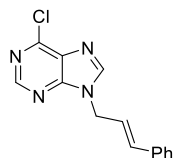

White solid, m.p. 80.1-83.6 °C, 1.70 g, 63% yield; **<sup>1</sup>H NMR** (400 MHz, CDCl<sub>3</sub>) δ 8.77 (s, 1H), 8.21 (s, 1H), 7.38-7.26 (m, 5H), 6.68 (d, *J* = 16.0 Hz, 1H), 6.40-6.33 (m, 1H), 5.07 (d, *J* = 6.4 Hz, 2H); **<sup>13</sup>C NMR** (100 MHz, CDCl<sub>3</sub>) δ 152.1, 151.8, 151.1, 145.0, 135.5, 135.3, 131.7, 128.8, 128.7, 126.7, 121.5, 46.1; **HRMS** (ESI-TOF): exact mass calcd for C<sub>14</sub>H<sub>11</sub>ClN<sub>4</sub> (M+Na)<sup>+</sup> requires *m/z* 293.0564, found *m/z* 293.0556.

**2,6-dichloro-9-cinnamyl-9H-purine (3b)**

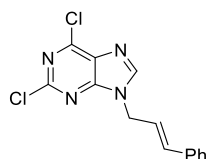

White solid, m.p. 136.8-138.0 °C, 1.52 g, 50% yield; **<sup>1</sup>H NMR** (400 MHz, CDCl<sub>3</sub>) δ 8.17 (s, 1H), 7.39-7.28 (m, 5H), 6.70 (d, *J* = 15.6 Hz, 1H), 6.37-6.30 (m, 1H), 5.03 (d, *J* = 6.4 Hz, 2H); **<sup>13</sup>C NMR** (100 MHz, CDCl<sub>3</sub>) δ 153.3, 153.1, 152.0, 145.6, 136.1, 135.2, 130.9, 128.9, 126.9, 121.0, 46.4; **HRMS** (ESI-TOF): exact mass calcd for C<sub>14</sub>H<sub>10</sub>Cl<sub>2</sub>N<sub>4</sub> (M+H)<sup>+</sup> requires *m/z* 305.0355, found *m/z* 305.0352.

**(E)-6-chloro-9-(pent-2-en-1-yl)-9H-purine (3c)**

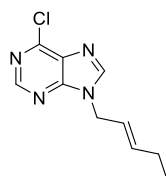

White solid, m.p. 26.6-29.7 °C, 0.98 g, 44% yield; **<sup>1</sup>H NMR** (600 MHz, CDCl<sub>3</sub>) δ 8.69 (s, 1H), 8.08 (s, 1H), 5.80-5.76 (m, 1H), 5.58-5.54 (m, 1H), 4.88 (d, *J* = 7.2 Hz, 2H), 2.25-2.20 (m, 2H), 1.02 (t, *J* = 7.2 Hz, 2H); **<sup>13</sup>C NMR** (150 MHz, CDCl<sub>3</sub>) δ 151.9, 151.7, 150.9, 144.7, 138.8, 131.6, 120.9, 40.8, 20.9, 13.9; **HRMS** (ESI-TOF): exact mass calcd for C<sub>10</sub>H<sub>11</sub>ClN<sub>4</sub> (M+H)<sup>+</sup> requires *m/z* 223.0745, found *m/z* 223.0741.

**(2) The analytical and spectral characterization data of the products**

**(S)-3-(6-chloro-9H-purin-9-yl)-2-phenylpropane-1,2-diol (2a)**

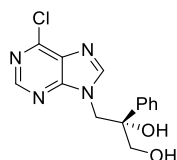

White solid, m.p. 66.2-69.2 °C, 288.8 mg, 95% yield, 96% ee;  $[\alpha]_{\text{D}}^{20} = 21.79$  ( $c = 0.257$ ,  $\text{CH}_3\text{OH}$ ); **HPLC** CHIRALCEL OD-H, *n*-hexane/2-propanol = 70/30, flow rate = 0.8 mL/min,  $\lambda = 256$  nm, retention time: 11.053 min, 17.538 min; **TLC**:  $R_f = 0.25$  (dichloromethane: methanol = 20:1) [UV];  **$^1\text{H}$  NMR** (600 MHz,  $\text{CD}_3\text{OD}$ )  $\delta$  8.57 (s, 1H), 8.30 (s, 1H), 7.43 (d,  $J = 7.2$  Hz, 2H), 7.18 (dt,  $J = 36.6, 7.8$  Hz, 3H), 4.76 (s, 2H), 3.90 (d,  $J = 11.4$  Hz, 1H), 3.75 (d,  $J = 11.4$  Hz, 1H);  **$^{13}\text{C}$  NMR** (150 MHz,  $\text{CD}_3\text{OD}$ )  $\delta$  153.8, 152.6, 150.8, 149.1, 142.4, 131.3, 129.1, 128.6, 126.8, 77.5, 68.6, 52.0; **HRMS** (ESI-TOF): exact mass calcd for  $\text{C}_{14}\text{H}_{13}\text{ClN}_4\text{O}_2$  ( $\text{M}+\text{H}$ ) $^+$  requires  $m/z$  305.0800, found  $m/z$  305.0801.

**(S)-3-(6-bromo-9H-purin-9-yl)-2-phenylpropane-1,2-diol (2b)**

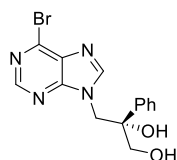

Brown oil, 327.1 mg, 94% yield, 95% ee;  $[\alpha]_{\text{D}}^{22} = 22.73$  ( $c = 0.274$ ,  $\text{CH}_3\text{OH}$ ); **HPLC** CHIRALCEL OD-H, *n*-hexane/2-propanol = 70/30, flow rate = 0.8 mL/min,  $\lambda = 256$  nm, retention time: 12.903 min, 17.563 min; **TLC**:  $R_f = 0.27$  (dichloromethane: methanol = 20:1) [UV];  **$^1\text{H}$  NMR** (400 MHz,  $\text{CD}_3\text{OD}$ )  $\delta$  8.52 (s, 1H), 8.30 (s, 1H), 7.44-7.42 (m, 2H), 7.18 (dt,  $J = 25.2, 7.2$  Hz, 3H), 4.75 (s, 2H), 3.90 (d,  $J = 11.6$  Hz, 1H), 3.75 (d,  $J = 11.6$  Hz, 1H);  **$^{13}\text{C}$  NMR** (100 MHz,  $\text{CD}_3\text{OD}$ )  $\delta$  152.5, 148.9, 142.7, 142.4, 134.0, 129.1, 128.6, 126.8, 77.5, 68.6, 52.0; **HRMS** (ESI-TOF): exact mass calcd for  $\text{C}_{14}\text{H}_{13}\text{BrN}_4\text{O}_2$  ( $\text{M}+\text{H}$ ) $^+$  requires  $m/z$  349.0295, found  $m/z$  349.0292.

**(S)-2-phenyl-3-(9H-purin-9-yl)propane-1,2-diol (2c)**

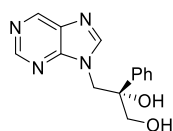

White solid, m.p. 107.6-108.9 °C, 72.9 mg, 27% yield, 84% ee;  $[\alpha]_{\text{D}}^{21} = 56.73$  ( $c = 0.241$ ,  $\text{CH}_3\text{OH}$ ); **HPLC** CHIRALCEL OD-H, *n*-hexane/2-propanol = 70/30, flow rate = 0.8 mL/min,  $\lambda = 256$  nm, retention time: 10.295 min, 17.490 min; **TLC**:  $R_f = 0.32$  (dichloromethane: methanol = 20:1) [UV];  **$^1\text{H}$  NMR** (600 MHz,  $\text{CD}_3\text{OD}$ )  $\delta$  8.94 (s, 1H), 8.79 (s, 1H), 8.29 (s, 1H), 7.45-7.44 (m,

2H), 7.16 (dt,  $J = 37.8, 7.2$  Hz, 3H), 4.76 (dd,  $J = 16.8, 14.4$  Hz, 2H), 3.89 (d,  $J = 11.4$  Hz, 1H), 3.76 (d,  $J = 11.4$  Hz, 1H);  $^{13}\text{C}$  NMR (150 MHz,  $\text{CD}_3\text{OD}$ )  $\delta$  153.3, 152.9, 149.2, 148.1, 142.6, 134.0, 129.1, 128.5, 126.8, 77.6, 68.6, 51.4; **HRMS** (ESI-TOF): exact mass calcd for  $\text{C}_{14}\text{H}_{14}\text{N}_4\text{O}_2$  ( $\text{M}+\text{H}$ ) $^+$  requires  $m/z$  271.1190, found  $m/z$  271.1193.

**(S)-3-(6-methyl-9H-purin-9-yl)-2-phenylpropane-1,2-diol (2d)**

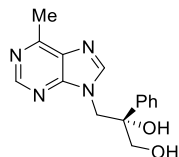

White solid, m.p. 161.9-162.9 °C, 264.2 mg, 93% yield, 94% ee;  $[\alpha]_{\text{D}}^{20} = 9.49$  ( $c = 0.260$ ,  $\text{CH}_3\text{OH}$ ); **HPLC** CHIRALCEL OD-H,  $n$ -hexane/2-propanol = 70/30, flow rate = 0.8 mL/min,  $\lambda = 250$  nm, retention time: 9.499 min, 13.586 min; **TLC**:  $R_f = 0.29$  (dichloromethane: methanol = 20:1) [UV];  $^1\text{H}$  NMR (600 MHz,  $\text{CD}_3\text{OD}$ )  $\delta$  8.65 (s, 1H), 8.21 (s, 1H), 7.46-7.44 (m, 2H), 7.19 (dt,  $J = 37.2, 7.2$  Hz, 3H), 4.74 (s, 2H), 3.86 (d,  $J = 11.4$  Hz, 1H), 3.73 (d,  $J = 11.4$  Hz, 1H), 2.74 (s, 3H);  $^{13}\text{C}$  NMR (150 MHz,  $\text{CD}_3\text{OD}$ )  $\delta$  159.4, 152.51, 152.47, 147.9, 142.7, 132.8, 129.1, 128.5, 126.9, 77.6, 68.7, 51.6, 18.9; **HRMS** (ESI-TOF): exact mass calcd for  $\text{C}_{15}\text{H}_{16}\text{N}_4\text{O}_2$  ( $\text{M}+\text{H}$ ) $^+$  requires  $m/z$  285.1346, found  $m/z$  285.1343.

**(S)-3-(6-methoxy-9H-purin-9-yl)-2-phenylpropane-1,2-diol (2e)**

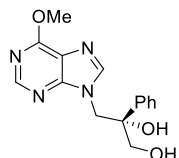

White solid, m.p. 140.9-142.6 °C, 285.1 mg, 95% yield, 96% ee;  $[\alpha]_{\text{D}}^{22} = 11.27$  ( $c = 0.284$ ,  $\text{CH}_3\text{OH}$ ); **HPLC** CHIRALCEL ID,  $n$ -hexane/2-propanol = 75/25, flow rate = 0.8 mL/min,  $\lambda = 254$  nm, retention time: 18.705 min, 19.487 min; **TLC**:  $R_f = 0.28$  (dichloromethane: methanol = 20:1) [UV];  $^1\text{H}$  NMR (600 MHz,  $\text{CD}_3\text{OD}$ )  $\delta$  8.37 (s, 1H), 8.01 (s, 1H), 7.46-7.44 (m, 2H), 7.23-7.14 (m, 3H), 4.68 (dd,  $J = 30.0, 21.0$  Hz, 2H), 4.10 (s, 3H), 3.77 (dd,  $J = 64.2, 16.8$  Hz, 2H), 3.35 (s, 2H);  $^{13}\text{C}$  NMR (150 MHz,  $\text{CD}_3\text{OD}$ )  $\delta$  162.0, 153.6, 152.8, 145.6, 142.7, 129.1, 128.4, 126.8, 121.0, 77.6, 68.5, 54.8, 51.8; **HRMS** (ESI-TOF): exact mass calcd for  $\text{C}_{15}\text{H}_{16}\text{N}_4\text{O}_3$  ( $\text{M}+\text{H}$ ) $^+$  requires  $m/z$  301.1295, found  $m/z$  301.1292.

**(S)-3-(6-ethoxy-9H-purin-9-yl)-2-phenylpropane-1,2-diol (2f)**

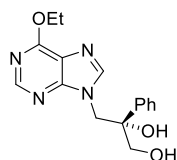

White solid, m.p. 142.9-143.8 °C, 279.6 mg, 89% yield, 93% ee;  $[\alpha]_D^{21} = 16.48$  ( $c = 0.267$ , CH<sub>3</sub>OH); **HPLC** CHIRALCEL OD-H, *n*-hexane/2-propanol = 70/30, flow rate = 0.8 mL/min,  $\lambda = 250$  nm, retention time: 11.142 min, 23.589 min; **TLC**:  $R_f = 0.31$  (dichloromethane: methanol = 20:1) [UV]; **<sup>1</sup>H NMR** (600 MHz, CD<sub>3</sub>OD)  $\delta$  8.38 (s, 1H), 8.02 (s, 1H), 7.46 (d,  $J = 7.2$  Hz, 2H), 7.20 (dt,  $J = 38.4, 7.8$  Hz, 3H), 4.69 (dd,  $J = 21.6, 14.4$  Hz, 2H), 4.60 (dd,  $J = 13.8, 7.2$  Hz, 2H), 3.82 (d,  $J = 12.0$  Hz, 2H), 3.71 (d,  $J = 12.0$  Hz, 2H), 1.45 (t,  $J = 7.2$  Hz, 3H); **<sup>13</sup>C NMR** (150 MHz, CD<sub>3</sub>OD)  $\delta$  161.7, 153.7, 152.8, 145.5, 142.8, 129.1, 128.5, 126.9, 121.0, 77.6, 68.6, 64.3, 51.7, 14.8; **HRMS** (ESI-TOF): exact mass calcd for C<sub>16</sub>H<sub>18</sub>N<sub>4</sub>O<sub>3</sub> (M+H)<sup>+</sup> requires  $m/z$  315.1452, found  $m/z$  315.1447.

**(S)-3-(6-(benzyloxy)-9H-purin-9-yl)-2-phenylpropane-1,2-diol (2g)**

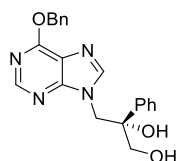

White solid, m.p. 135.3-138.1 °C, 331.0 mg, 88% yield, 93% ee;  $[\alpha]_D^{20} = 17.16$  ( $c = 0.268$ , CH<sub>3</sub>OH); **HPLC** CHIRALCEL IA, *n*-hexane/2-propanol = 70/30, flow rate = 0.8 mL/min,  $\lambda = 256$  nm, retention time: 10.383 min, 18.422 min; **TLC**:  $R_f = 0.25$  (dichloromethane: methanol = 20:1) [UV]; **<sup>1</sup>H NMR** (400 MHz, CD<sub>3</sub>OD)  $\delta$  8.40 (s, 1H), 8.01 (s, 1H), 7.49-7.44 (m, 4H), 7.35-7.28 (m, 3H), 7.23-7.13 (m, 3H), 5.58 (s, 2H), 4.68 (dd,  $J = 21.6, 14.4$  Hz, 2H), 3.76 (dd,  $J = 45.2, 11.6$  Hz, 2H); **<sup>13</sup>C NMR** (100 MHz, CD<sub>3</sub>OD)  $\delta$  161.4, 153.8, 152.7, 145.7, 142.7, 137.5, 129.5, 129.4, 129.2, 129.1, 128.5, 126.8, 121.0, 77.5, 69.7, 68.5, 51.7; **HRMS** (ESI-TOF): exact mass calcd for C<sub>21</sub>H<sub>20</sub>N<sub>4</sub>O<sub>3</sub> (M+H)<sup>+</sup> requires  $m/z$  377.1608, found  $m/z$  377.1610.

**(S)-3-(6-(dimethylamino)-9H-purin-9-yl)-2-phenylpropane-1,2-diol (2h)**

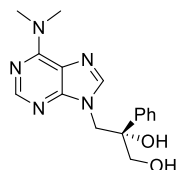

White solid, m.p. 112.1-113.3 °C, 291.2 mg, 93% yield, 95% ee;  $[\alpha]_D^{22} = 21.62$  ( $c = 0.260$ , CH<sub>3</sub>OH); **HPLC** CHIRALCEL OD-H, *n*-hexane/2-propanol = 70/30, flow rate = 0.8 mL/min,  $\lambda =$

256 nm, retention time: 9.975 min, 13.920 min; **TLC**:  $R_f$  = 0.32 (dichloromethane: methanol = 20:1) [UV];  **$^1\text{H}$  NMR** (400 MHz,  $\text{CD}_3\text{OD}$ )  $\delta$  8.13 (s, 1H), 7.74 (s, 1H), 7.50-7.48 (m, 2H), 7.22 (dt,  $J$  = 28.8, 7.2 Hz, 3H), 4.57 (dd,  $J$  = 36.4, 14.4 Hz, 2H), 3.69 (dd,  $J$  = 37.2, 11.2 Hz, 2H), 3.42 (s, 6H);  **$^{13}\text{C}$  NMR** (100 MHz,  $\text{CD}_3\text{OD}$ )  $\delta$  156.0, 152.6, 151.8, 143.2, 142.0, 129.1, 128.4, 126.9, 120.1, 77.6, 68.4, 51.5, 39.0; **HRMS** (ESI-TOF): exact mass calcd for  $\text{C}_{16}\text{H}_{19}\text{N}_5\text{O}_2$  ( $\text{M}+\text{H}$ )<sup>+</sup> requires  $m/z$  314.1612, found  $m/z$  314.1609.

**(S)-3-(6-(diethylamino)-9H-purin-9-yl)-2-phenylpropane-1,2-diol (2i)**

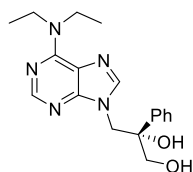

White solid, m.p. 78.3-82.0 °C, 276.4 mg, 81% yield, 92% ee;  $[\alpha]_{\text{D}}^{22}$  = -32.68 ( $c$  = 0.284,  $\text{CH}_3\text{OH}$ ); **HPLC** CHIRALCEL OD-H,  $n$ -hexane/2-propanol = 70/30, flow rate = 0.8 mL/min,  $\lambda$  = 256 nm, retention time: 7.002 min, 10.013 min; **TLC**:  $R_f$  = 0.32 (dichloromethane: methanol = 20:1) [UV];  **$^1\text{H}$  NMR** (400 MHz,  $\text{CD}_3\text{OD}$ )  $\delta$  8.15 (s, 1H), 7.75 (s, 1H), 7.52-7.49 (m, 2H), 7.30-7.19 (m, 3H), 4.59 (dd,  $J$  = 44.0, 14.4 Hz, 2H), 3.94 (s, 4H), 3.69 (dd,  $J$  = 35.6, 11.2 Hz, 2H), 1.24 (t,  $J$  = 6.8 Hz, 6H);  **$^{13}\text{C}$  NMR** (100 MHz,  $\text{CD}_3\text{OD}$ )  $\delta$  154.9, 152.8, 151.9, 143.3, 142.1, 129.1, 128.4, 126.9, 119.6, 77.6, 68.4, 51.4, 44.3, 13.8; **HRMS** (ESI-TOF): exact mass calcd for  $\text{C}_{18}\text{H}_{23}\text{N}_5\text{O}_2$  ( $\text{M}+\text{H}$ )<sup>+</sup> requires  $m/z$  342.1925, found  $m/z$  342.1926.

**tert-butyl**

**(S)-(tert-butoxycarbonyl)(9-(2,3-dihydroxy-2-phenylpropyl)-9H-purin-6-yl)carbamate (2j)**

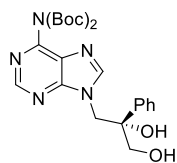

White solid, m.p. 145.9-149.6 °C, 470.6 mg, 97% yield, 95% ee;  $[\alpha]_{\text{D}}^{22}$  = 29.64 ( $c$  = 0.227,  $\text{CH}_3\text{OH}$ ); **HPLC** CHIRALCEL OD-H,  $n$ -hexane/2-propanol = 75/25, flow rate = 0.8 mL/min,  $\lambda$  = 250 nm, retention time: 9.779 min, 11.579 min; **TLC**:  $R_f$  = 0.29 (dichloromethane: methanol = 20:1) [UV];  **$^1\text{H}$  NMR** (600 MHz,  $\text{CD}_3\text{OD}$ )  $\delta$  8.73 (s, 1H), 8.34 (s, 1H), 7.47 (d,  $J$  = 7.8 Hz, 2H), 7.17 (dt,  $J$  = 40.2, 7.2 Hz, 3H), 4.89 (d,  $J$  = 14.4 Hz, 1H), 4.77 (d,  $J$  = 14.4 Hz, 1H), 3.93 (d,  $J$  = 11.4 Hz, 1H), 3.77 (d,  $J$  = 11.4 Hz, 1H), 1.33 (s, 18H);  **$^{13}\text{C}$  NMR** (150 MHz,  $\text{CD}_3\text{OD}$ )  $\delta$  155.4, 152.4, 151.2, 150.4, 149.0, 142.4, 129.2, 129.1, 128.5, 126.9, 85.08, 85.06, 77.6, 68.9, 51.8, 28.0;

**HRMS** (ESI-TOF): exact mass calcd for C<sub>24</sub>H<sub>31</sub>N<sub>5</sub>O<sub>6</sub> (M+H)<sup>+</sup> requires m/z 486.2347, found m/z 486.2340.

**(S)-2-phenyl-3-(6-(pyrrolidin-1-yl)-9H-purin-9-yl)propane-1,2-diol (2k)**

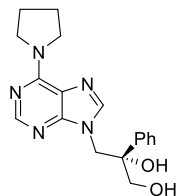

White solid, m.p. 136.7-139.4 °C, 287.4 mg, 85% yield, 97% ee; [ $\alpha$ ]<sub>D</sub><sup>22</sup> = 24.69 (c = 0.243, CH<sub>3</sub>OH); **HPLC** CHIRALCEL OD-H, *n*-hexane/2-propanol = 70/30, flow rate = 0.8 mL/min,  $\lambda$  = 250 nm, retention time: 11.884 min, 16.558 min; **TLC**: R<sub>f</sub> = 0.29 (dichloromethane: methanol = 30:1) [UV]; **<sup>1</sup>H NMR** (600 MHz, DMSO-*d*<sup>6</sup>)  $\delta$  8.17 (s, 1H), 7.87 (s, 1H), 7.51 (d, *J* = 7.8 Hz, 2H), 7.21 (dt, *J* = 45.6, 7.8 Hz, 3H), 5.76 (s, 1H), 5.32 (t, *J* = 6.0 Hz, 1H), 4.55 (dd, *J* = 39.6, 14.4 Hz, 2H), 3.99 (s, 2H), 3.86-3.46 (m, 4H), 1.90 (d, *J* = 33.0 Hz, 4H); **<sup>13</sup>C NMR** (150 MHz, DMSO-*d*<sup>6</sup>)  $\delta$  152.4, 151.8, 150.3, 142.9, 141.0, 127.6, 126.8, 126.0, 118.6, 76.0, 67.4, 49.6, 48.4, 47.0, 43.2, 25.7, 23.7; **HRMS** (ESI-TOF): exact mass calcd for C<sub>18</sub>H<sub>21</sub>N<sub>5</sub>O<sub>2</sub> (M+H)<sup>+</sup> requires m/z 340.1768, found m/z 340.1763.

**(S)-2-phenyl-3-(6-phenyl-9H-purin-9-yl)propane-1,2-diol (2l)**

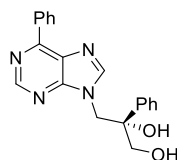

White solid, m.p. 117.0-119.9 °C, 308.0 mg, 89% yield, 98% ee; [ $\alpha$ ]<sub>D</sub><sup>22</sup> = 39.78 (c = 0.238, CH<sub>3</sub>OH); **HPLC** CHIRALCEL IA, *n*-hexane/2-propanol = 80/20, flow rate = 0.6 mL/min,  $\lambda$  = 256 nm, retention time: 20.137 min, 21.135 min; **TLC**: R<sub>f</sub> = 0.35 (dichloromethane: methanol = 20:1) [UV]; **<sup>1</sup>H NMR** (400 MHz, CD<sub>3</sub>OD)  $\delta$  8.78 (s, 1H), 8.54-8.52 (m, 2H), 8.20 (s, 1H), 7.51-7.46 (m, 5H), 7.24-7.13 (m, 3H), 4.72 (dd, *J* = 22.0, 14.4 Hz, 2H), 3.80 (dd, *J* = 44.0, 11.2 Hz, 2H); **<sup>13</sup>C NMR** (100 MHz, CD<sub>3</sub>OD)  $\delta$  155.6, 154.2, 152.7, 148.3, 142.7, 136.5, 132.0, 131.1, 130.8, 129.6, 129.1, 128.5, 126.9, 77.6, 68.5, 51.5; **HRMS** (ESI-TOF): exact mass calcd for C<sub>20</sub>H<sub>18</sub>N<sub>4</sub>O<sub>2</sub> (M+H)<sup>+</sup> requires m/z 347.1503, found m/z 347.1504.

**(S)-3-(6-(naphthalen-1-yl)-9H-purin-9-yl)-2-phenylpropane-1,2-diol (2m)**

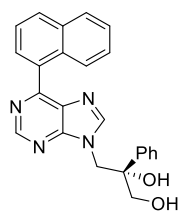

White solid, m.p. 83.3-86.0 °C, 273.3 mg, 69% yield, 99% ee;  $[\alpha]_{\text{D}}^{22} = 13.22$  ( $c = 0.227$ , CH<sub>3</sub>OH); **HPLC** CHIRALCEL ID, *n*-hexane/2-propanol = 80/20, flow rate = 0.8 mL/min,  $\lambda = 256$  nm, retention time: 24.455 min, 27.318 min; **TLC**:  $R_f = 0.27$  (dichloromethane: methanol = 20:1) [UV]; **<sup>1</sup>H NMR** (600 MHz, CD<sub>3</sub>OD)  $\delta$  8.92 (s, 1H), 8.25 (s, 1H), 8.05 (d,  $J = 8.4$  Hz, 1H), 7.96 (d,  $J = 7.8$  Hz, 1H), 7.81-7.77 (m, 2H), 7.62 (t,  $J = 7.2$  Hz, 1H), 7.53-7.48 (m, 3H), 7.45-7.42 (m, 1H), 7.24 (t,  $J = 7.8$  Hz, 2H), 7.17 (t,  $J = 7.8$  Hz, 1H), 4.79 (s, 2H), 3.91 (d,  $J = 11.4$  Hz, 1H), 3.78 (d,  $J = 11.4$  Hz, 1H); **<sup>13</sup>C NMR** (150 MHz, CD<sub>3</sub>OD)  $\delta$  158.3, 154.0, 152.7, 148.9, 142.7, 135.3, 133.6, 132.7, 132.3, 131.5, 130.1, 129.5, 129.1, 128.5, 127.7, 127.3, 126.9, 126.5, 126.2, 77.7, 68.6, 51.7; **HRMS** (ESI-TOF): exact mass calcd for C<sub>24</sub>H<sub>20</sub>N<sub>4</sub>O<sub>2</sub> (M+H)<sup>+</sup> requires  $m/z$  397.1659, found  $m/z$  397.1660.

**(S)-3-(2,6-dichloro-9H-purin-9-yl)-2-phenylpropane-1,2-diol (2n)**

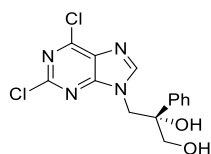

White solid, m.p. 167.8-169.3 °C, 189.3 mg, 56% yield, 94% ee;  $[\alpha]_{\text{D}}^{22} = -29.69$  ( $c = 0.274$ , CH<sub>3</sub>OH); **HPLC** CHIRALCEL OD-H, *n*-hexane/2-propanol = 70/30, flow rate = 0.8 mL/min,  $\lambda = 250$  nm, retention time: 10.197 min, 14.640 min; **TLC**:  $R_f = 0.32$  (dichloromethane: methanol = 20:1) [UV]; **<sup>1</sup>H NMR** (600 MHz, CD<sub>3</sub>OD)  $\delta$  8.28 (s, 1H), 7.41-7.39 (m, 2H), 7.18 (dt,  $J = 34.2$ , 7.2 Hz, 3H), 4.69 (dd,  $J = 18.6$ , 14.4 Hz, 2H), 3.95 (d,  $J = 11.4$  Hz, 1H), 3.77 (d,  $J = 11.4$  Hz, 1H); **<sup>13</sup>C NMR** (150 MHz, CD<sub>3</sub>OD)  $\delta$  155.2, 153.4, 151.3, 149.7, 142.2, 130.6, 129.1, 128.6, 126.9, 77.4, 68.5, 52.4; **HRMS** (ESI-TOF): exact mass calcd for C<sub>14</sub>H<sub>12</sub>Cl<sub>2</sub>N<sub>4</sub>O<sub>2</sub> (M+H)<sup>+</sup> requires  $m/z$  339.0410, found  $m/z$  339.0401.

**tert-butyl-(S)-((6-chloro-9-(2,3-dihydroxy-2-phenylpropyl)-9H-purin-2-yl)carbamate (2o)**

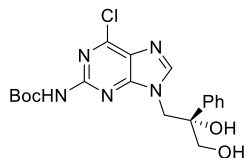

White solid, m.p. 161.7-164.3 °C, 373.0 mg, 89% yield, 98% ee;  $[\alpha]_{\text{D}}^{22} = -29.76$  ( $c = 0.336$ , CH<sub>3</sub>OH); **HPLC** CHIRALCEL IA, *n*-hexane/2-propanol = 80/20, flow rate = 0.8 mL/min,  $\lambda = 250$  nm, retention time: 11.552 min, 13.834 min; **TLC**:  $R_f = 0.34$  (dichloromethane: methanol = 20:1) [UV]; **<sup>1</sup>H NMR** (600 MHz, CD<sub>3</sub>OD)  $\delta$  7.99 (s, 1H), 7.51 (d,  $J = 7.2$  Hz, 2H), 7.24 (dt,  $J = 39.6, 7.2$  Hz, 3H), 4.77 (d,  $J = 15.0$  Hz, 1H), 4.67 (d,  $J = 15.0$  Hz, 1H), 3.76 (d,  $J = 12.0$  Hz, 1H), 3.62 (d,  $J = 11.4$  Hz, 1H), 1.57 (s, 9H); **<sup>13</sup>C NMR** (150 MHz, CD<sub>3</sub>OD)  $\delta$  154.6, 154.2, 153.3, 151.4, 148.0, 143.1, 129.1, 128.5, 127.5, 127.0, 82.3, 77.2, 68.0, 51.5, 28.5; **HRMS** (ESI-TOF): exact mass calcd for C<sub>19</sub>H<sub>22</sub>ClN<sub>5</sub>O<sub>4</sub> (M+H)<sup>+</sup> requires  $m/z$  420.1433, found  $m/z$  420.1430.

**(S)-9-(2,3-dihydroxy-2-phenylpropyl)-1,3-dimethyl-3,9-dihydro-1H-purine-2,6-dione (2p)**

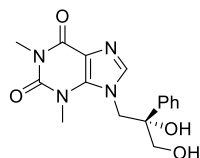

White solid, m.p. 138.0-140.3 °C, 280.6 mg, 85% yield, 88% ee;  $[\alpha]_{\text{D}}^{22} = 22.81$  ( $c = 0.300$ , CH<sub>3</sub>OH); **HPLC** CHIRALCEL IA, *n*-hexane/2-propanol = 70/30, flow rate = 0.8 mL/min,  $\lambda = 250$  nm, retention time: 12.671 min, 14.628 min; **TLC**:  $R_f = 0.30$  (dichloromethane: methanol = 20:1) [UV]; **<sup>1</sup>H NMR** (600 MHz, CD<sub>3</sub>OD)  $\delta$  7.60 (s, 1H), 7.43 (d,  $J = 7.2$  Hz, 2H), 7.26 (t,  $J = 7.2$  Hz, 2H), 7.20 (t,  $J = 7.2$  Hz, 2H), 4.85 (d,  $J = 13.2$  Hz, 1H), 4.72 (d,  $J = 14.4$  Hz, 1H), 3.82 (d,  $J = 11.4$  Hz, 1H), 3.71 (d,  $J = 11.4$  Hz, 1H), 3.44 (s, 3H), 3.29 (s, 3H); **<sup>13</sup>C NMR** (150 MHz, CD<sub>3</sub>OD)  $\delta$  157.1, 152.9, 149.2, 144.6, 142.5, 129.1, 128.5, 126.8, 108.7, 77.6, 68.5, 53.9, 30.1, 28.3; **HRMS** (ESI-TOF): exact mass calcd for C<sub>16</sub>H<sub>18</sub>N<sub>4</sub>O<sub>4</sub> (M+H)<sup>+</sup> requires  $m/z$  331.1401, found  $m/z$  331.1392.

**(S)-3-(6-chloro-9H-purin-9-yl)-2-methylpropane-1,2-diol (2q)**

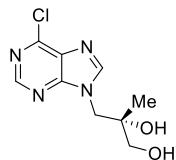

White solid, m.p. 128.0-130.2 °C, 222.7 mg, 92% yield, 57% ee;  $[\alpha]_{\text{D}}^{22} = -10.67$  ( $c = 0.300$  CH<sub>3</sub>OH); **HPLC** CHIRALCEL IC, *n*-hexane/2-propanol = 75/25, flow rate = 0.8 mL/min,  $\lambda = 254$  nm, retention time: 13.296 min, 14.619 min; **TLC**:  $R_f = 0.22$  (dichloromethane: methanol = 20:1) [UV]; **<sup>1</sup>H NMR** (600 MHz, CD<sub>3</sub>OD)  $\delta$  8.72 (s, 1H), 8.53 (s, 1H), 4.41 (dd,  $J = 25.2, 10.8$  Hz, 2H), 3.43-3.39 (m, 2H), 1.11 (s, 3H); **<sup>13</sup>C NMR** (150 MHz, CD<sub>3</sub>OD)  $\delta$  154.0, 152.9, 151.1, 149.5,

131.7, 73.3, 68.4, 51.5, 22.5; **HRMS** (ESI-TOF): exact mass calcd for  $C_9H_{11}ClN_4O_2$  ( $M+H$ )<sup>+</sup> requires  $m/z$  243.0643, found  $m/z$  243.0644.

**(S)-2-((6-chloro-9H-purin-9-yl)methyl)butane-1,2-diol (2r)**

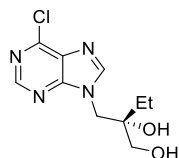

White solid, m.p. 98.7-100.7 °C, 225.3 mg, 88% yield, 84% ee;  $[\alpha]_D^{21} = -18.59$  ( $c = 0.283$ ,  $CH_3OH$ ); **HPLC** CHIRALCEL IC, *n*-hexane/2-propanol = 70/30, flow rate = 0.8 mL/min,  $\lambda = 250$  nm, retention time: 11.190 min, 12.856 min; **TLC**:  $R_f = 0.32$  (dichloromethane: methanol = 20:1) [UV]; **<sup>1</sup>H NMR** (600 MHz,  $CD_3OD$ )  $\delta$  8.71 (s, 1H), 8.52 (s, 1H), 4.42 (dd,  $J = 21.6, 14.4$  Hz, 2H), 3.43 (d,  $J = 11.4$  Hz, 1H), 3.31 (d,  $J = 11.4$  Hz, 1H), 1.61-1.54 (sext,  $J = 7.2$  Hz, 1H), 1.48-1.42 (sext,  $J = 7.2$  Hz, 1H), 0.96 (t,  $J = 7.2$  Hz, 3H); **<sup>13</sup>C NMR** (150 MHz,  $CD_3OD$ )  $\delta$  154.0, 152.8, 151.1, 149.6, 131.7, 75.1, 64.9, 50.3, 28.5, 7.5; **HRMS** (ESI-TOF): exact mass calcd for  $C_{10}H_{13}ClN_4O_2$  ( $M+H$ )<sup>+</sup> requires  $m/z$  257.0800, found  $m/z$  257.0791.

**(S)-3-(6-chloro-9H-purin-9-yl)-2-cyclohexylpropane-1,2-diol (2s)**

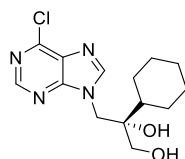

White solid, m.p. 158.8-159.3 °C, 272.9 mg, 88% yield, 75% ee;  $[\alpha]_D^{22} = 18.45$  ( $c = 0.300$ ,  $CH_3OH$ ); **HPLC** CHIRALCEL ID, *n*-hexane/2-propanol = 80/20, flow rate = 0.8 mL/min,  $\lambda = 256$  nm, retention time: 14.102 min, 15.310 min; **TLC**:  $R_f = 0.36$  (dichloromethane: methanol = 20:1) [UV]; **<sup>1</sup>H NMR** (400 MHz,  $CD_3OD$ )  $\delta$  8.73 (s, 1H), 8.53 (s, 1H), 4.49 (dd,  $J = 30.0, 14.4$  Hz, 2H), 3.42 (d,  $J = 11.6$  Hz, 1H), 3.34 (d,  $J = 11.2$  Hz, 1H), 2.03-1.91 (m, 2H), 1.79 (s, 2H), 1.67 (s, 1H), 1.49-1.43 (m, 1H), 1.28-1.12 (m, 6H); **<sup>13</sup>C NMR** (100 MHz,  $CD_3OD$ )  $\delta$  154.2, 152.8, 151.1, 149.9, 131.7, 76.3, 64.0, 44.2, 28.0, 28.0, 27.93, 27.86, 27.8, 27.5; **HRMS** (ESI-TOF): exact mass calcd for  $C_{14}H_{19}ClN_4O_2$  ( $M+H$ )<sup>+</sup> requires  $m/z$  311.1269, found  $m/z$  311.1266.

**(S)-3-(2,6-dichloro-9H-purin-9-yl)-2-methylpropane-1,2-diol (2t)**

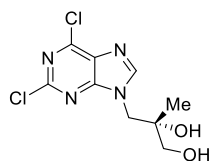

White solid, m.p. 149.1-149.9 °C, 237.4 mg, 86% yield, 68% ee;  $[\alpha]_{\text{D}}^{20} = -22.31$  ( $c = 0.260$ , CH<sub>3</sub>OH); **HPLC** CHIRALCEL ID, *n*-hexane/2-propanol = 70/30, flow rate = 0.8 mL/min,  $\lambda = 250$  nm, retention time: 7.564 min, 8.475 min; **TLC**:  $R_f = 0.35$  (dichloromethane: methanol = 20:1) [UV]; **<sup>1</sup>H NMR** (600 MHz, CD<sub>3</sub>OD)  $\delta$  8.51 (s, 1H), 4.36 (dd,  $J = 22.2, 7.8$  Hz, 2H), 3.43 (dd,  $J = 14.4, 11.4$  Hz, 2H), 1.11 (s, 3H); **<sup>13</sup>C NMR** (150 MHz, CD<sub>3</sub>OD)  $\delta$  155.4, 153.7, 151.7, 150.2, 131.0, 73.3, 68.4, 51.7, 22.4; **HRMS** (ESI-TOF): exact mass calcd for C<sub>9</sub>H<sub>10</sub>Cl<sub>2</sub>N<sub>4</sub>O<sub>2</sub> (M+H)<sup>+</sup> requires  $m/z$  277.0254, found  $m/z$  277.0251.

**(S)-N-(1-(2,3-dihydroxy-2-methylpropyl)-2-oxo-1,2-dihydropyrimidin-4-yl)benzamide (2u)**

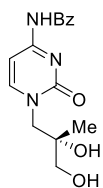

White solid, m.p. 177.2-178.3 °C, 245.5 mg, 81% yield, 80% ee;  $[\alpha]_{\text{D}}^{25} = -31.6$  ( $c = 0.336$ , CH<sub>3</sub>OH); **HPLC** CHIRALCEL OD-H, *n*-hexane/2-propanol = 80/20, flow rate = 0.8 mL/min,  $\lambda = 250$  nm, retention time: 27.841 min, 31.883 min; **TLC**:  $R_f = 0.26$  (dichloromethane: methanol = 20:1) [UV]; **<sup>1</sup>H NMR** (400 MHz, CD<sub>3</sub>OD)  $\delta$  8.04 (d,  $J = 10.8$  Hz, 1H), 7.98-7.96 (m, 2H), 7.65-7.51 (m, 4H), 4.05 (dd,  $J = 20.4, 14.0$  Hz, 2H), 3.35 (dd,  $J = 14.4, 11.6$  Hz, 2H), 1.20 (s, 3H); **<sup>13</sup>C NMR** (100 MHz, CD<sub>3</sub>OD)  $\delta$  169.1, 164.8, 159.8, 152.9, 134.7, 134.1, 129.8, 129.1, 98.2, 74.0, 68.2, 56.6, 22.8; **HRMS** (ESI-TOF): exact mass calcd for C<sub>15</sub>H<sub>17</sub>N<sub>3</sub>O<sub>4</sub> (M+H)<sup>+</sup> requires  $m/z$  304.1292, found  $m/z$  304.1290.

**(S)-N-(1-(2,3-dihydroxy-2-phenylpropyl)-2-oxo-1,2-dihydropyrimidin-4-yl)benzamide (2v)**

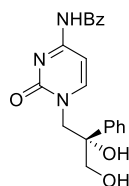

White solid, m.p. 147.5-148.2 °C, 204.4 mg, 56% yield, 95% ee;  $[\alpha]_{\text{D}}^{25} = -38.3$  ( $c = 0.283$ , CH<sub>3</sub>OH); **HPLC** CHIRALCEL OD-H, *n*-hexane/2-propanol = 70/30, flow rate = 0.8 mL/min,  $\lambda = 250$  nm, retention time: 18.002 min, 26.105 min; **TLC**:  $R_f = 0.29$  (dichloromethane: methanol = 20:1) [UV]; **<sup>1</sup>H NMR** (400 MHz, CD<sub>3</sub>OD)  $\delta$  7.96-7.94 (m, 2H), 7.87 (d,  $J = 7.6$  Hz, 1H), 7.65-7.61 (m, 1H), 7.57-7.51 (m, 4H), 7.44 (d,  $J = 7.2$  Hz, 1H), 7.36-7.33 (m, 2H), 7.28-7.25 (m, 1H), 4.61 (d,  $J = 14.0$  Hz, 1H), 4.17 (d,  $J = 14.0$  Hz, 1H), 3.78 (d,  $J = 11.6$  Hz, 1H), 3.69 (d,  $J =$

11.6 Hz, 1H);  $^{13}\text{C}$  NMR (100 MHz,  $\text{CD}_3\text{OD}$ )  $\delta$  164.7, 152.7, 143.3, 134.7, 134.1, 129.8, 129.3, 129.1, 128.6, 127.0, 98.0, 78.0, 68.4, 57.3; **HRMS** (ESI-TOF): exact mass calcd for  $\text{C}_{20}\text{H}_{19}\text{N}_3\text{O}_4$  ( $\text{M}+\text{H}$ ) $^+$  requires  $m/z$  366.1448, found  $m/z$  366.1446.

**(S)-3-benzoyl-1-(2,3-dihydroxy-2-phenylpropyl)-5-methylpyrimidine-2,4(1H,3H)-dione (2w)**

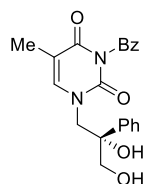

White solid, m.p. 138.4-139.2 °C, 315.5 mg, 83% yield, 98% ee;  $[\alpha]_{\text{D}}^{25} = 59.5$  ( $c = 0.600$ ,  $\text{CH}_3\text{OH}$ ); **HPLC** CHIRALCEL OD-H,  $n$ -hexane/2-propanol = 70/30, flow rate = 0.8 mL/min,  $\lambda = 250$  nm, retention time: 17.108 min, 23.746 min; **TLC**:  $R_f = 0.31$  (dichloromethane: methanol = 20:1) [UV];  $^1\text{H}$  NMR (600 MHz,  $\text{CD}_3\text{OD}$ )  $\delta$  7.67 (t,  $J = 7.8$  Hz, 2H), 7.53-7.48 (m, 6H), 7.35-7.48 (m, 3H), 4.19 (s, 2H), 3.86 (d,  $J = 11.4$  Hz, 1H), 3.71 (d,  $J = 11.4$  Hz, 1H), 1.82 (s, 3H);  $^{13}\text{C}$  NMR (150 MHz,  $\text{CD}_3\text{OD}$ )  $\delta$  170.2, 164.9, 151.9, 144.6, 142.7, 136.2, 132.7, 131.3, 130.3, 129.7, 129.5, 129.21, 129.16, 128.9, 128.6, 127.0, 109.8, 78.0, 68.6, 54.83, 54.79, 12.2; **HRMS** (ESI-TOF): exact mass calcd for  $\text{C}_{21}\text{H}_{20}\text{N}_2\text{O}_5$  ( $\text{M}+\text{Na}$ ) $^+$  requires  $m/z$  403.1264, found  $m/z$  403.1261.

**(S)-3-(1H-benzo[d]imidazol-1-yl)-2-phenylpropane-1,2-diol (2x)**

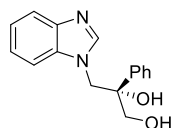

White solid, m.p. 137.7-140.2 °C, 185.0 mg, 69% yield, 85% ee;  $[\alpha]_{\text{D}}^{22} = 17.20$  ( $c = 0.283$ ,  $\text{CH}_3\text{OH}$ ); **HPLC** CHIRALCEL OD-H,  $n$ -hexane/2-propanol = 70/30, flow rate = 0.8 mL/min,  $\lambda = 250$  nm, retention time: 9.235 min, 13.211 min; **TLC**:  $R_f = 0.34$  (dichloromethane: methanol = 20:1) [UV];  $^1\text{H}$  NMR (600 MHz,  $\text{CD}_3\text{OD}$ )  $\delta$  7.82 (s, 1H), 7.56-7.54 (m, 1H), 7.41-7.37 (m, 3H), 7.25-7.13 (m, 5H), 4.58 (dd,  $J = 59.4, 14.4$  Hz, 2H), 3.81 (dd,  $J = 71.4, 11.4$  Hz, 2H);  $^{13}\text{C}$  NMR (150 MHz,  $\text{CD}_3\text{OD}$ )  $\delta$  145.7, 143.4, 143.0, 129.2, 128.5, 126.9, 123.8, 123.0, 119.5, 112.1, 77.6, 67.9, 52.8; **HRMS** (ESI-TOF): exact mass calcd for  $\text{C}_{16}\text{H}_{16}\text{N}_2\text{O}_2$  ( $\text{M}+\text{H}$ ) $^+$  requires  $m/z$  269.1285, found  $m/z$  269.1285.

**3-(6-chloro-9H-purin-9-yl)-1-phenylpropane-1,2-diol (4a)**

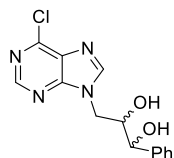

White solid, m.p. 140.0-141.7 °C, 273.6 mg, 90% yield, >20/1 dr, 97% ee;  $[\alpha]_{\text{D}}^{21} = 9.61$  ( $c = 0.222$ ,  $\text{CH}_3\text{OH}$ ); **HPLC** CHIRALCEL OD-H, *n*-hexane/2-propanol = 70/30, flow rate = 0.8 mL/min,  $\lambda = 256$  nm, retention time: 9.170 min, 10.773 min; **TLC**:  $R_f = 0.31$  (dichloromethane: methanol = 20:1) [UV];  **$^1\text{H}$  NMR** (600 MHz,  $\text{CD}_3\text{OD}$ )  $\delta$  8.66 (s, 1H), 8.46 (s, 1H), 7.44 (d,  $J = 7.8$  Hz, 2H), 7.34-7.24 (m, 3H), 4.70 (d,  $J = 4.8$  Hz, 1H), 4.42 (dd,  $J = 14.4, 3.0$  Hz, 1H), 4.29-4.25 (m, 1H), 4.19-4.16 (m, 1H);  **$^{13}\text{C}$  NMR** (150 MHz,  $\text{CD}_3\text{OD}$ )  $\delta$  153.34, 153.31, 152.7, 150.9, 149.2, 142.6, 132.1, 129.3, 128.8, 128.0, 76.2, 74.1, 48.5; **HRMS** (ESI-TOF): exact mass calcd for  $\text{C}_{14}\text{H}_{13}\text{ClN}_4\text{O}_2$  ( $\text{M}+\text{H}$ ) $^+$  requires  $m/z$  305.0800, found  $m/z$  305.0791.

### 3-(2,6-dichloro-9H-purin-9-yl)-1-phenylpropane-1,2-diol (4b)

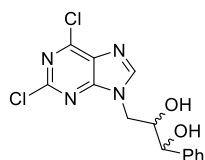

White solid, m.p. 63.1-65.9 °C, 202.8 mg, 60% yield, >20/1 dr, 93% ee;  $[\alpha]_{\text{D}}^{21} = 20.58$  ( $c = 0.243$ ,  $\text{CH}_3\text{OH}$ ); **HPLC** CHIRALCEL IA, *n*-hexane/2-propanol = 70/30, flow rate = 0.8 mL/min,  $\lambda = 250$  nm, retention time: 8.786 min, 10.319 min; **TLC**:  $R_f = 0.30$  (dichloromethane: methanol = 20:1) [UV];  **$^1\text{H}$  NMR** (600 MHz,  $\text{CD}_3\text{OD}$ )  $\delta$  8.45 (s, 1H), 7.43 (d,  $J = 7.2$  Hz, 2H), 7.29 (dt,  $J = 45.0, 7.2$  Hz, 3H), 4.69 (d,  $J = 4.8$  Hz, 1H), 4.37 (dd,  $J = 13.8, 3.0$  Hz, 1H), 4.26-4.22 (m, 1H), 4.17-4.14 (m, 1H);  **$^{13}\text{C}$  NMR** (150 MHz,  $\text{CD}_3\text{OD}$ )  $\delta$  154.7, 153.5, 151.5, 149.8, 142.4, 131.3, 129.2, 128.7, 128.0, 76.0, 74.0; **HRMS** (ESI-TOF): exact mass calcd for  $\text{C}_{14}\text{H}_{12}\text{Cl}_2\text{N}_4\text{O}_2$  ( $\text{M}+\text{H}$ ) $^+$  requires  $m/z$  339.0410, found  $m/z$  339.0403.

### 1-(6-chloro-9H-purin-9-yl)pentane-2,3-diol (4c)

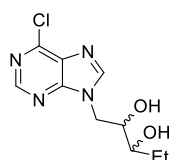

White solid, m.p. 72.4-75.1 °C, 227.9 mg, 89% yield, >20/1 dr, 53% ee;  $[\alpha]_{\text{D}}^{22} = -23.35$  ( $c = 0.260$ ,  $\text{CH}_3\text{OH}$ ); **HPLC** CHIRALCEL OD-H, *n*-hexane/2-propanol = 70/30, flow rate = 0.8 mL/min,  $\lambda = 250$  nm, retention time: 6.624 min, 7.814 min; **TLC**:  $R_f = 0.38$  (dichloromethane: methanol = 20:1) [UV];  **$^1\text{H}$  NMR** (400 MHz,  $\text{CD}_3\text{OD}$ )  $\delta$  8.73 (s, 1H), 8.53 (s, 1H), 4.71 (dd,  $J = 14.4, 3.2$  Hz, 1H),

4.34-4.28 (m, 1H), 3.80-3.76 (m, 1H), 3.41-3.37 (m, 1H), 1.83-1.76 (m, 1H), 1.51-1.43 (s, 1H), 1.02 (t,  $J = 7.2$  Hz, 3H);  $^{13}\text{C}$  NMR (100 MHz,  $\text{CD}_3\text{OD}$ )  $\delta$  153.6, 152.8, 151.0, 149.4, 132.2, 75.6, 73.5, 27.3, 10.3; **HRMS** (ESI-TOF): exact mass calcd for  $\text{C}_{10}\text{H}_{13}\text{ClN}_4\text{O}_2$  ( $\text{M}+\text{H}$ ) $^+$  requires  $m/z$  257.0800, found  $m/z$  257.0806.

**1-(6-chloro-9H-purin-9-yl)-3-methylbutane-2,3-diol (4d)**

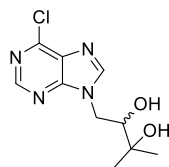

White solid, m.p. 98.1-100.2 °C, 197.2 mg, 77% yield, 92% ee;  $[\alpha]_{\text{D}}^{22} = 37.77$  ( $c = 0.274$ ,  $\text{CH}_3\text{OH}$ ); **HPLC** CHIRALCEL OD-H,  $n$ -hexane/2-propanol = 70/30, flow rate = 0.8 mL/min,  $\lambda = 254$  nm, retention time: 7.685 min, 8.924 min; **TLC**:  $R_f = 0.23$  (dichloromethane: methanol = 20:1) [UV];  $^1\text{H}$  NMR (400 MHz,  $\text{CD}_3\text{OD}$ )  $\delta$  8.73 (s, 1H), 8.54 (s, 1H), 4.74 (dd,  $J = 14.0, 2.4$  Hz, 1H), 4.26-4.20 (m, 1H), 3.72 (dd,  $J = 10.4, 2.4$  Hz, 1H), 1.30 (d,  $J = 6.8$  Hz, 6H);  $^{13}\text{C}$  NMR (100 MHz,  $\text{CD}_3\text{OD}$ )  $\delta$  153.5, 152.8, 150.9, 149.4, 132.2, 76.8, 72.8, 47.5, 26.7, 24.8; **HRMS** (ESI-TOF): exact mass calcd for  $\text{C}_{10}\text{H}_{13}\text{ClN}_4\text{O}_2$  ( $\text{M}+\text{H}$ ) $^+$  requires  $m/z$  257.0800, found  $m/z$  257.0807.

## 5. Copies of $^1\text{H}$ and $^{13}\text{C}$ NMR spectra

### (1) Copies of NMR spectra of starting materials

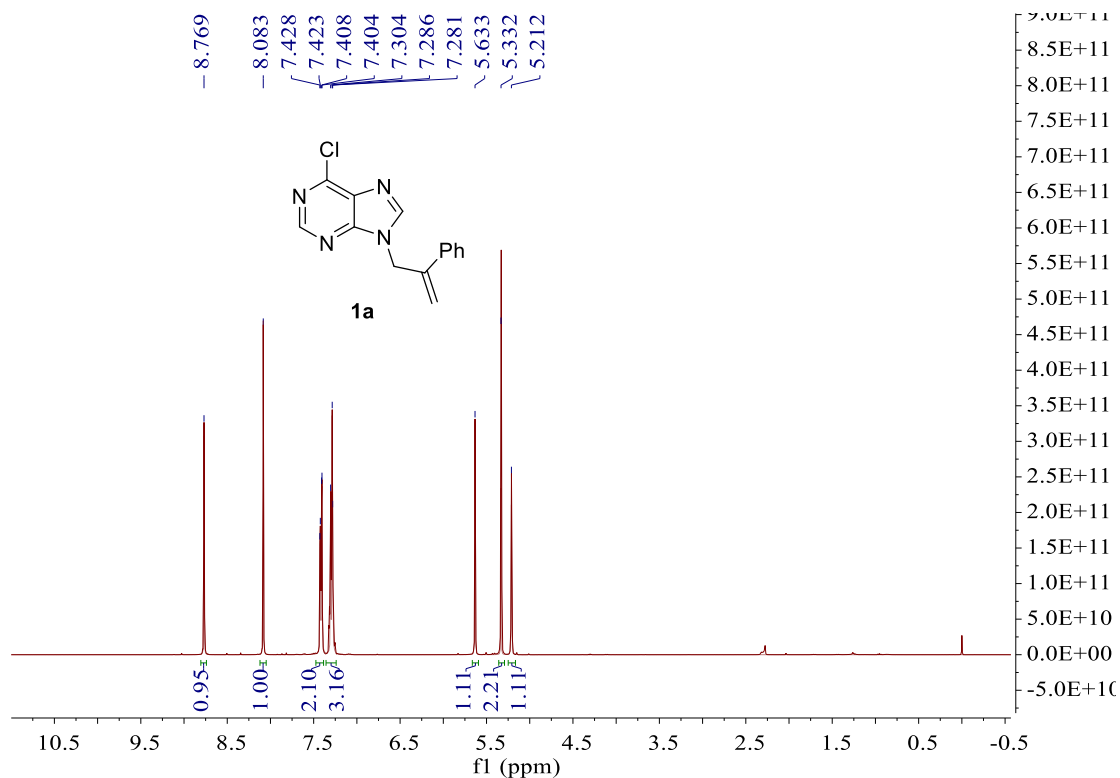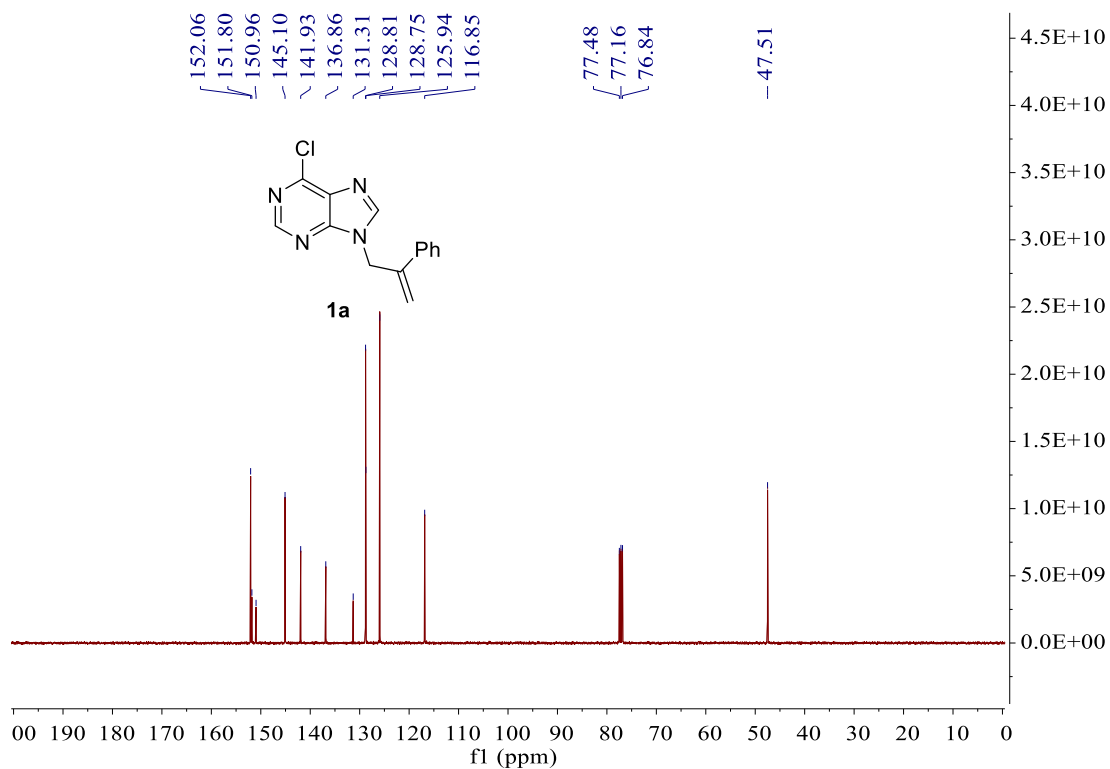

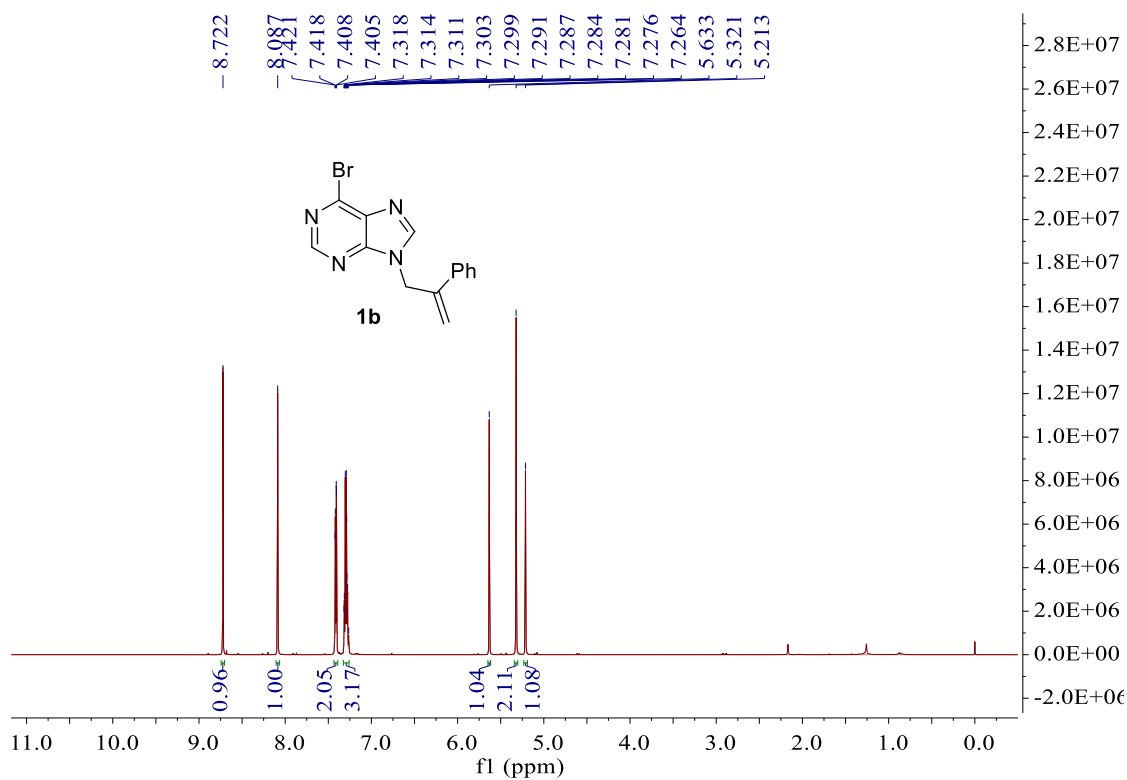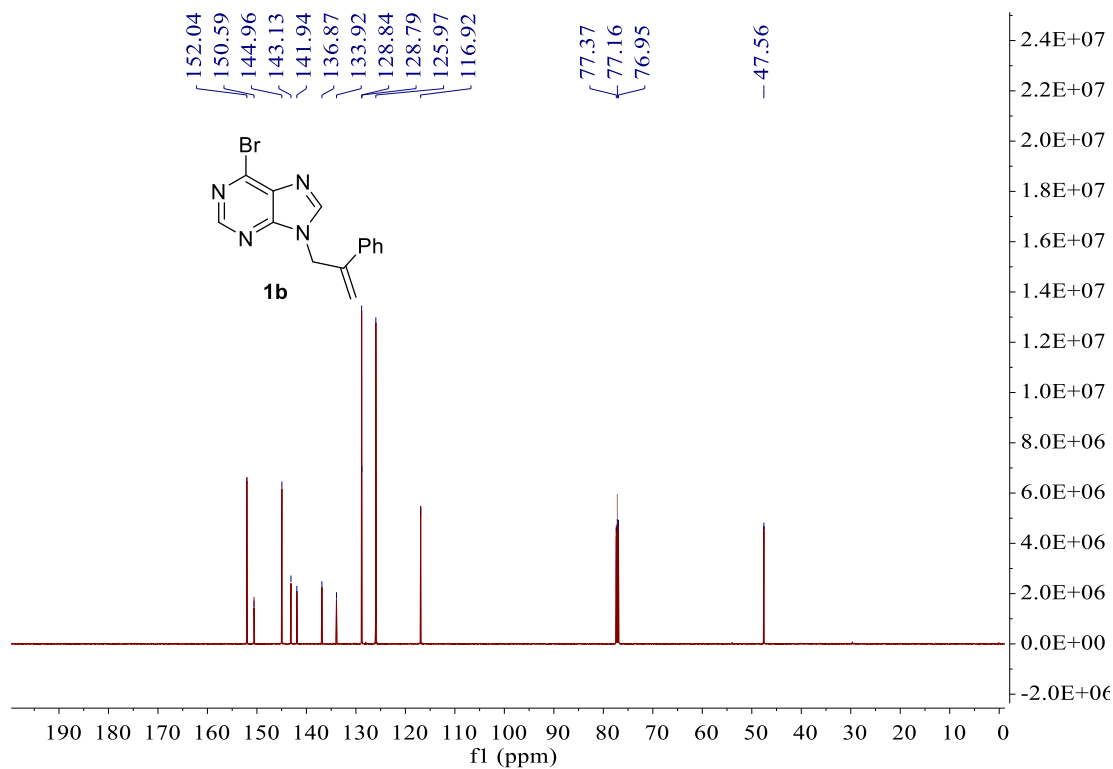

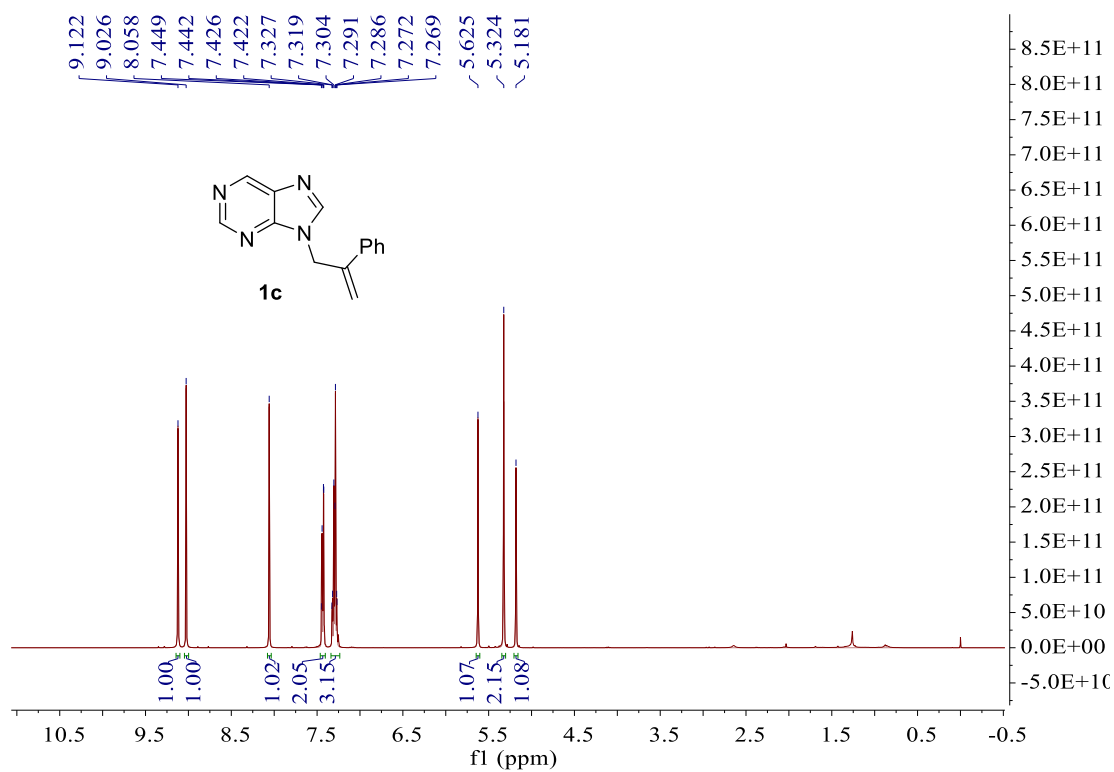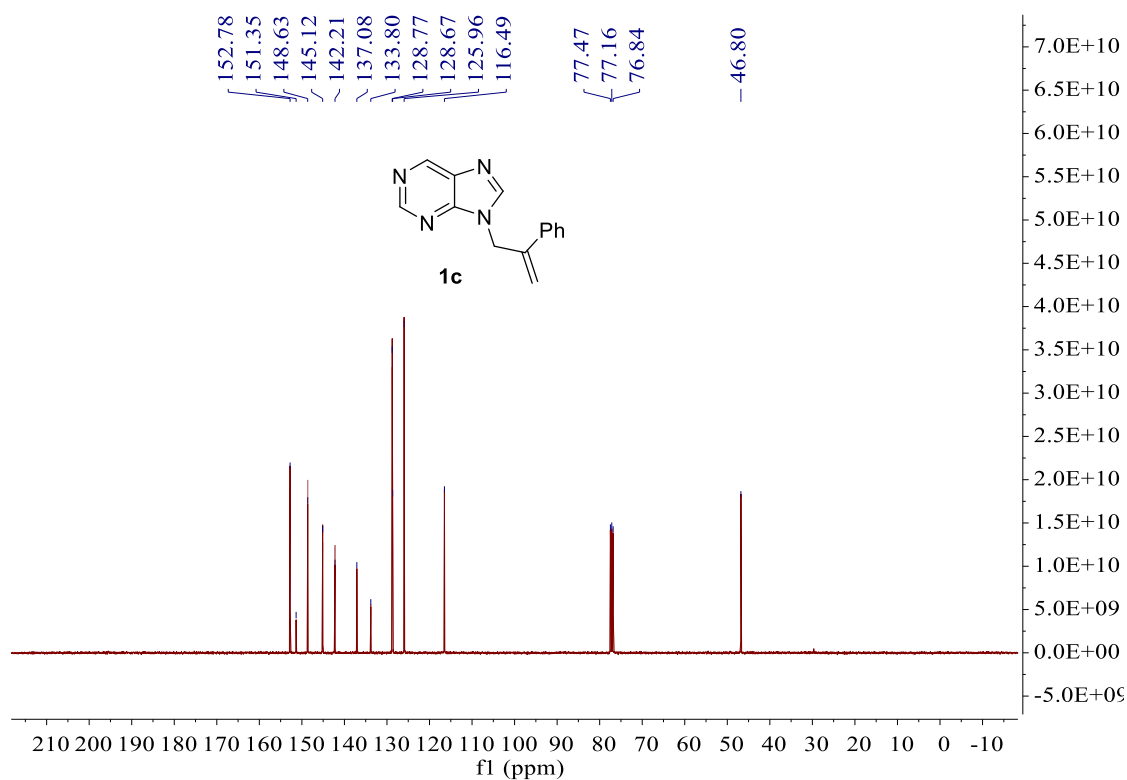

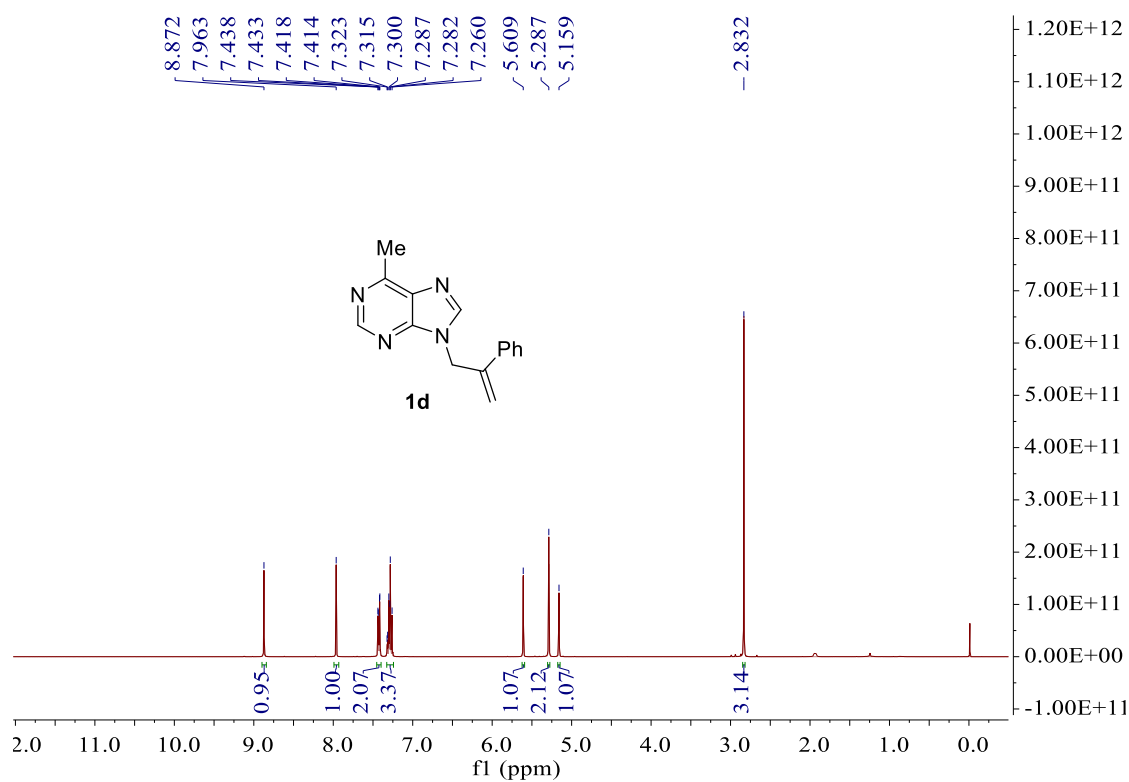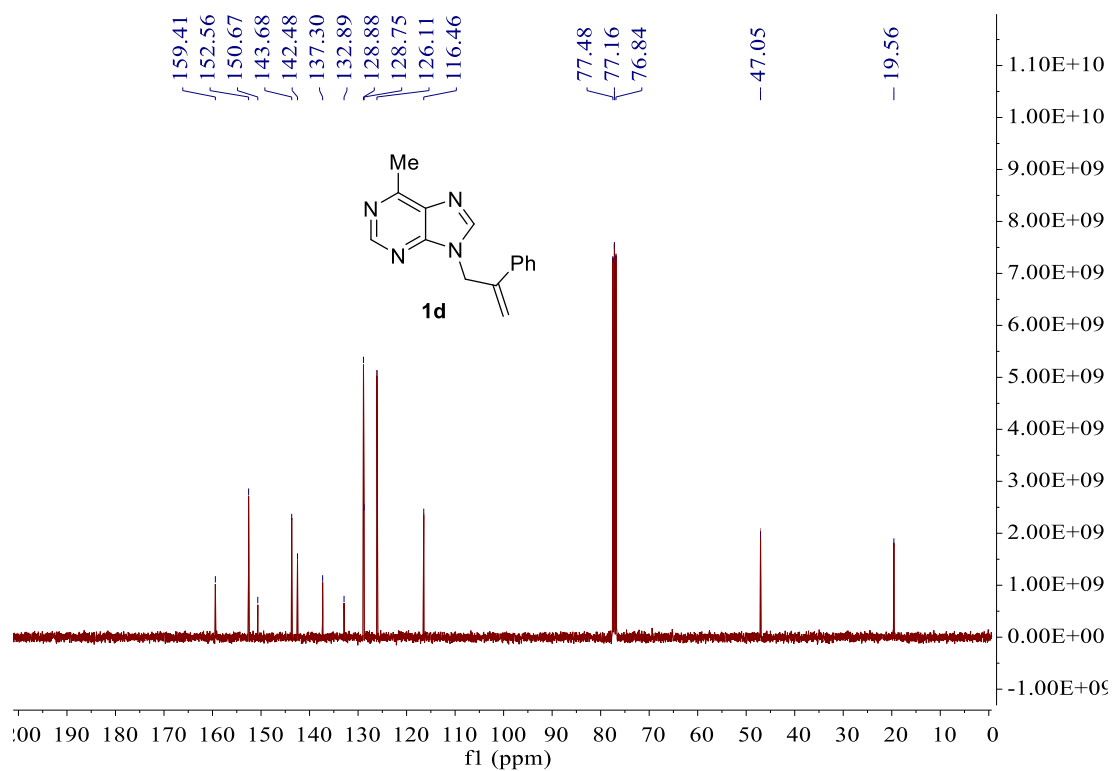

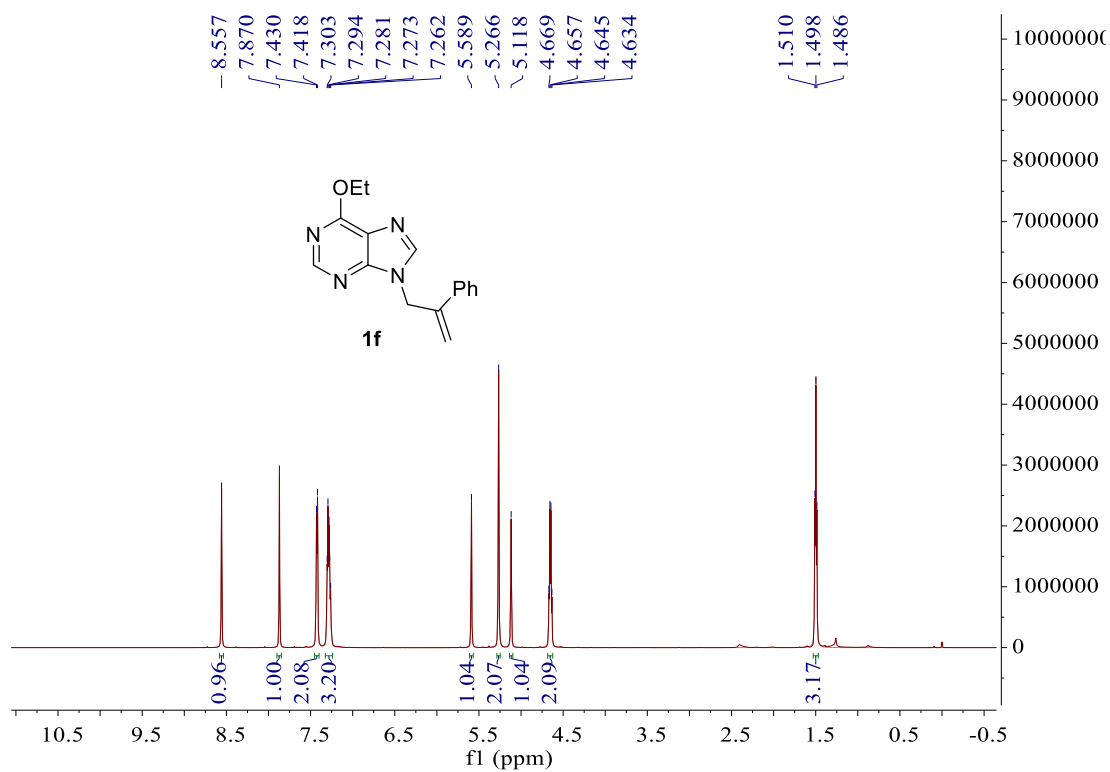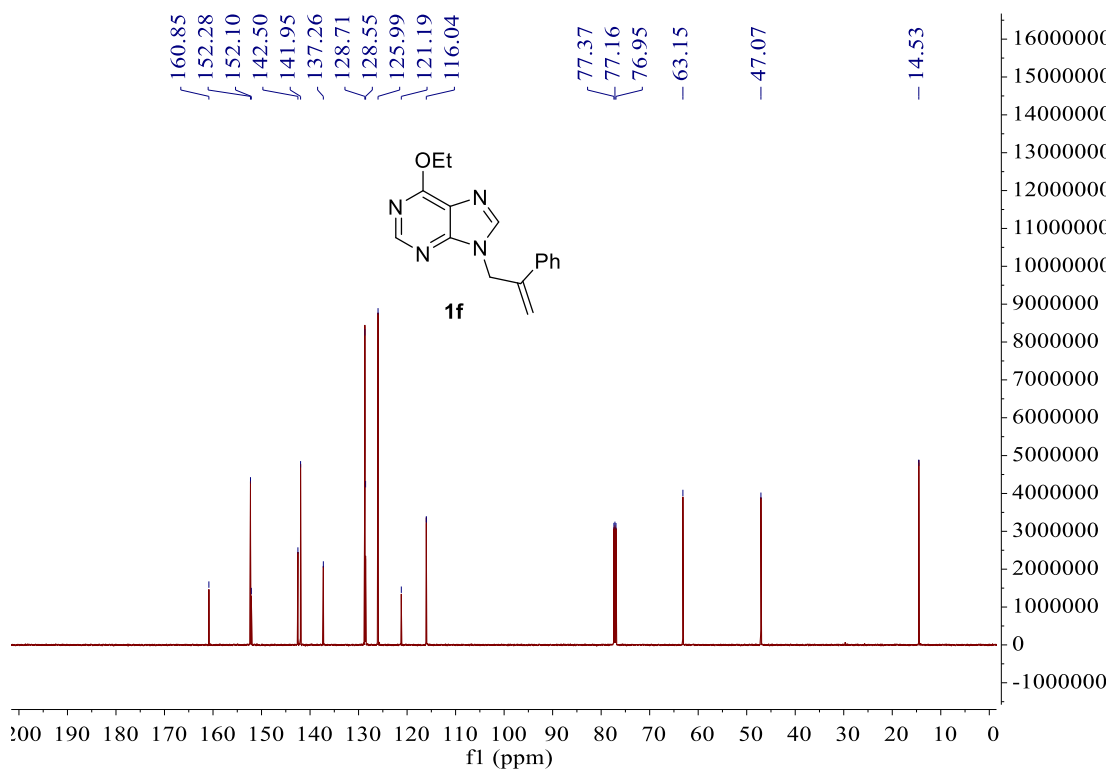

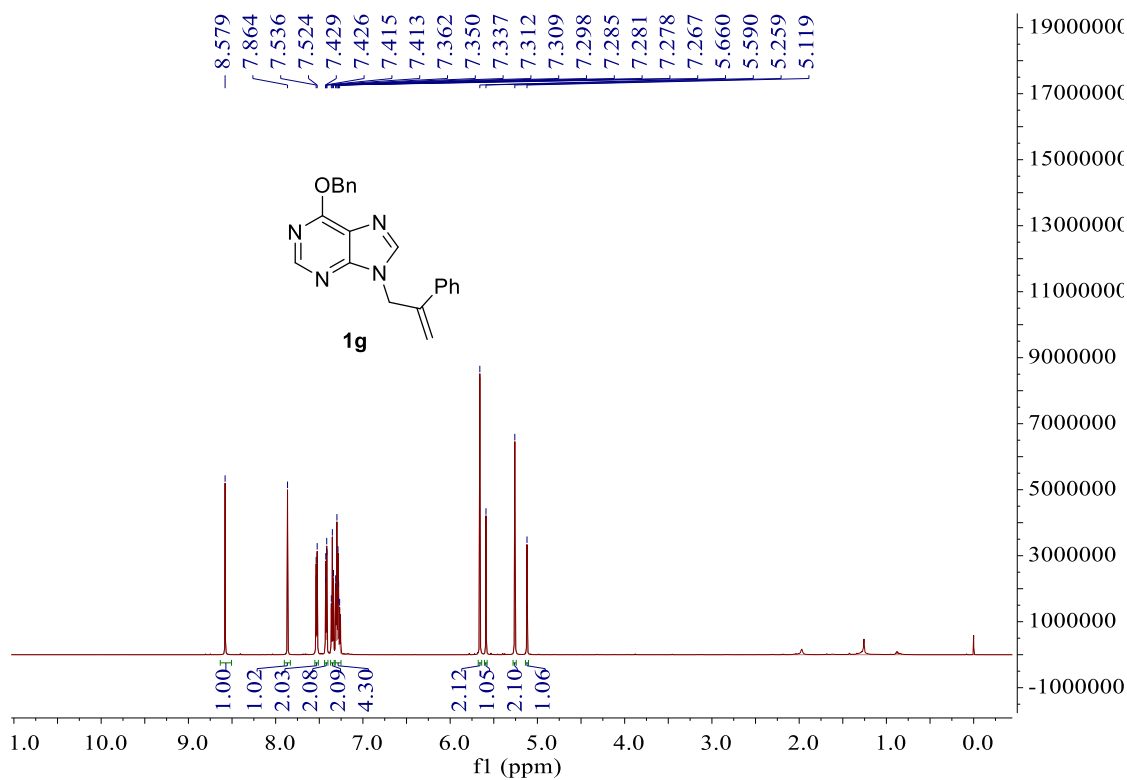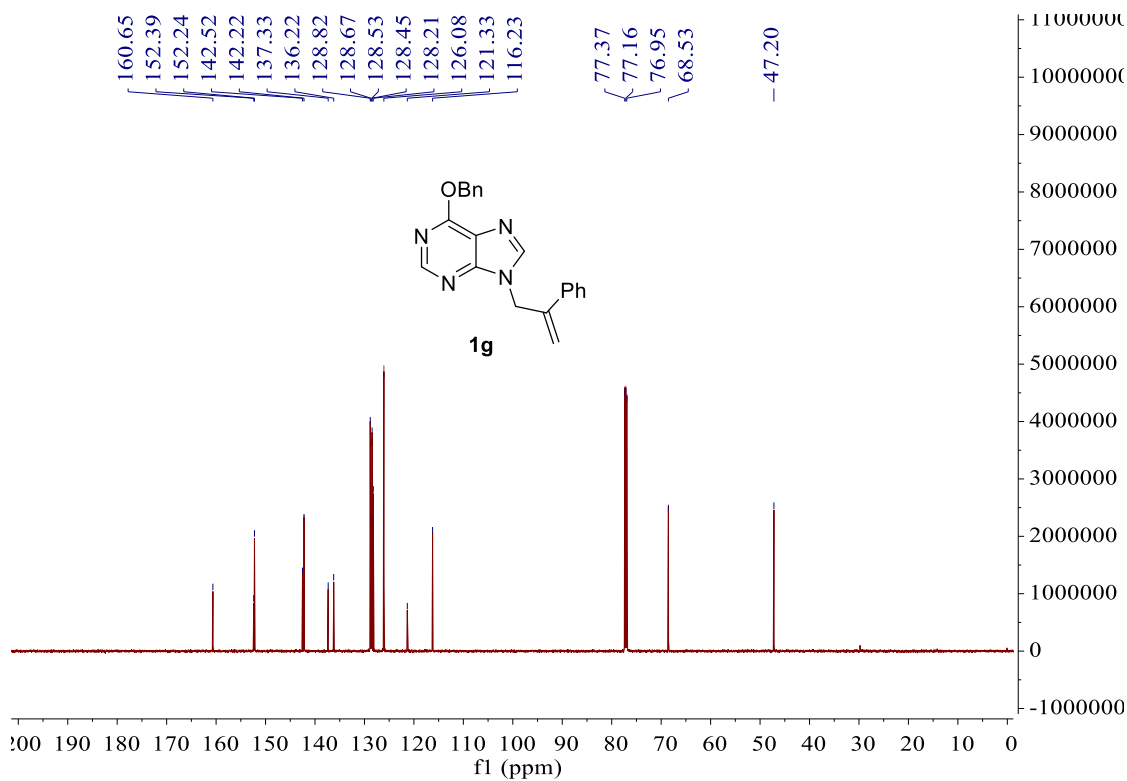

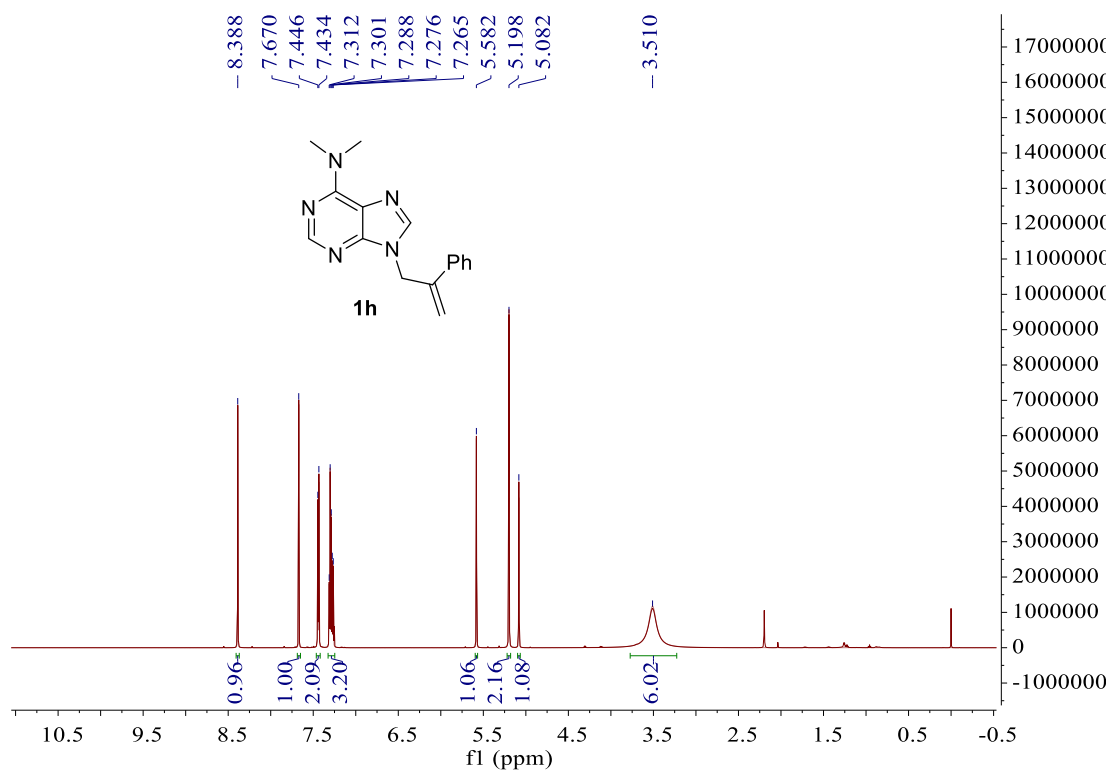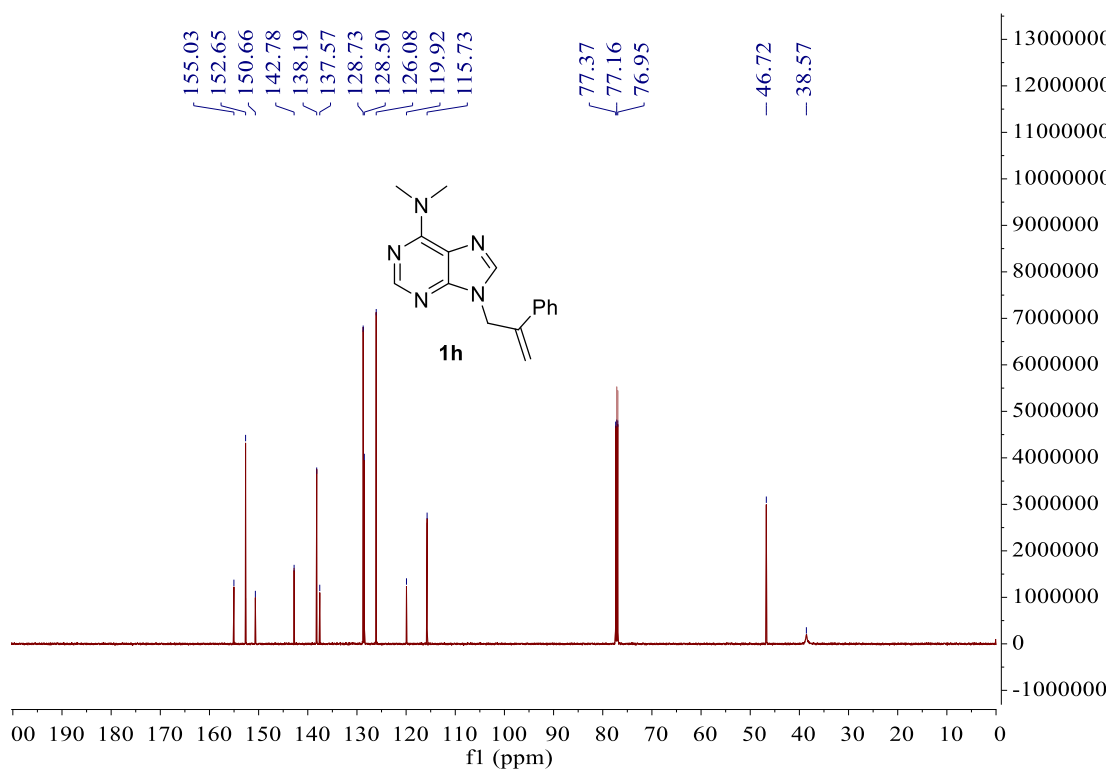

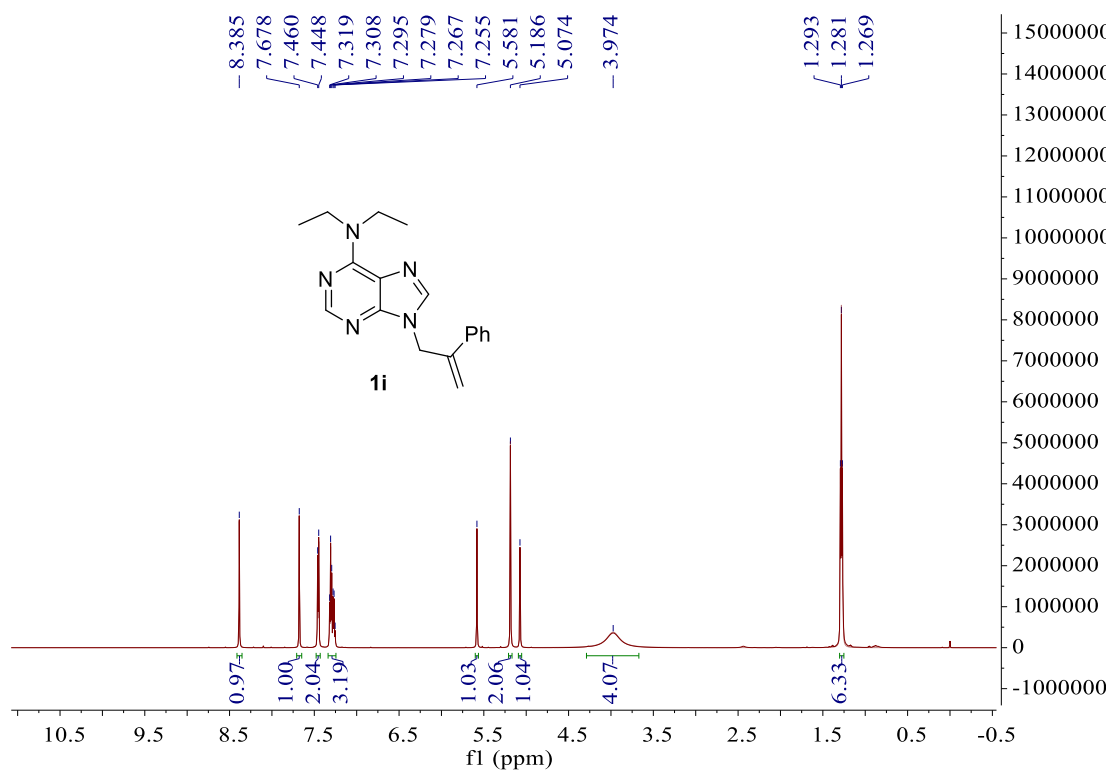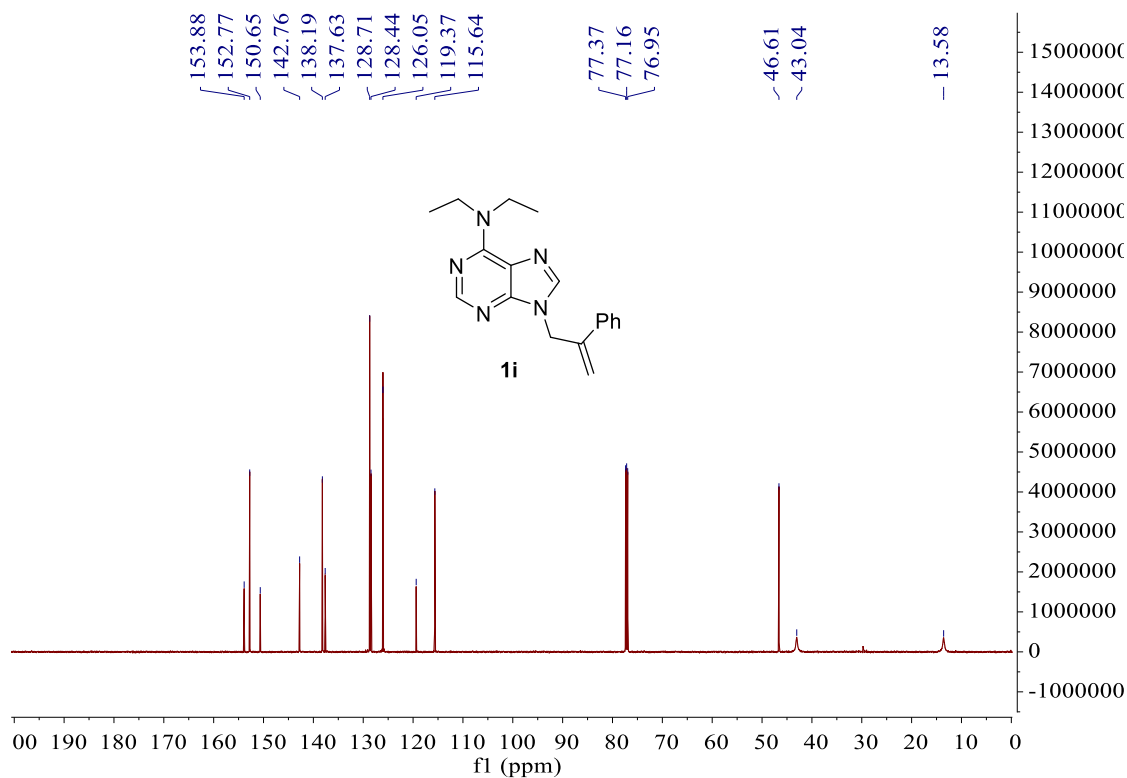

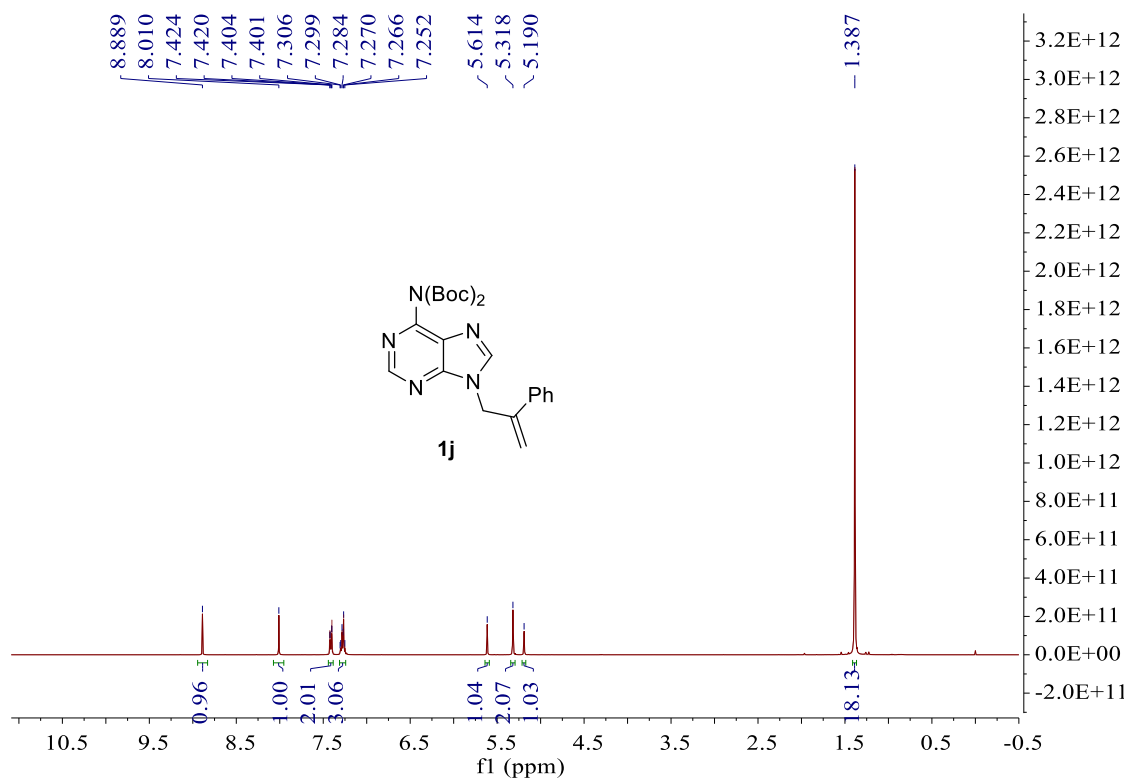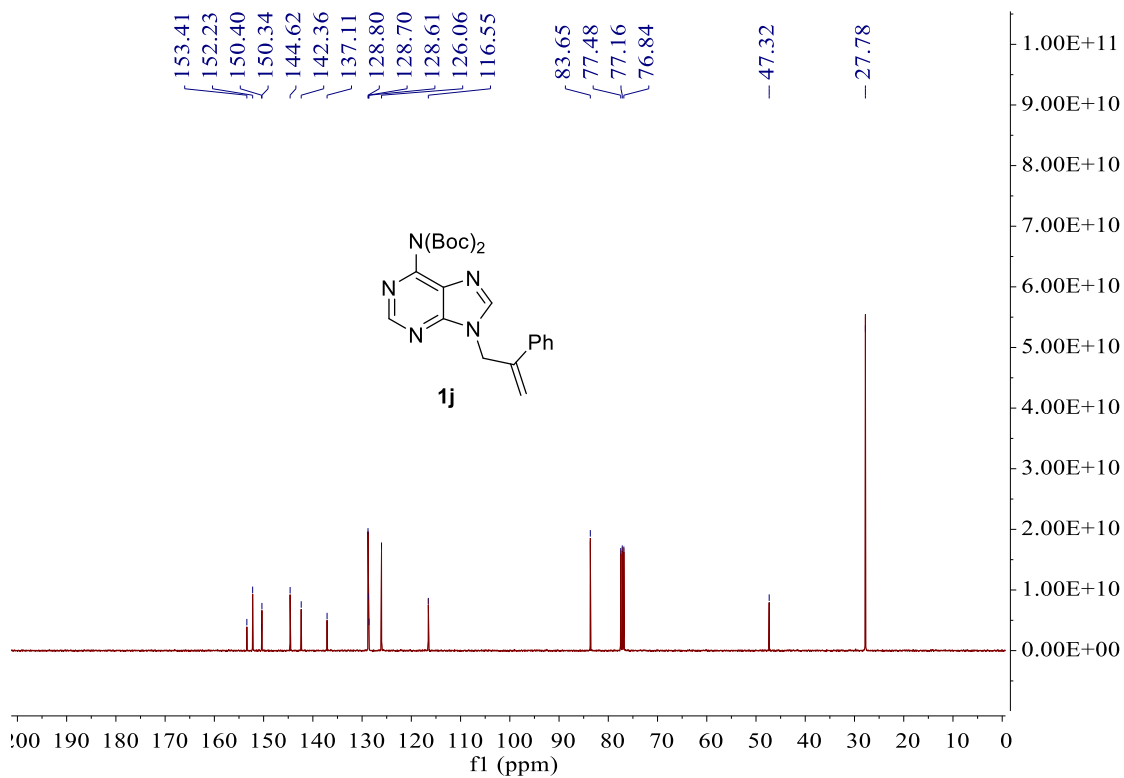

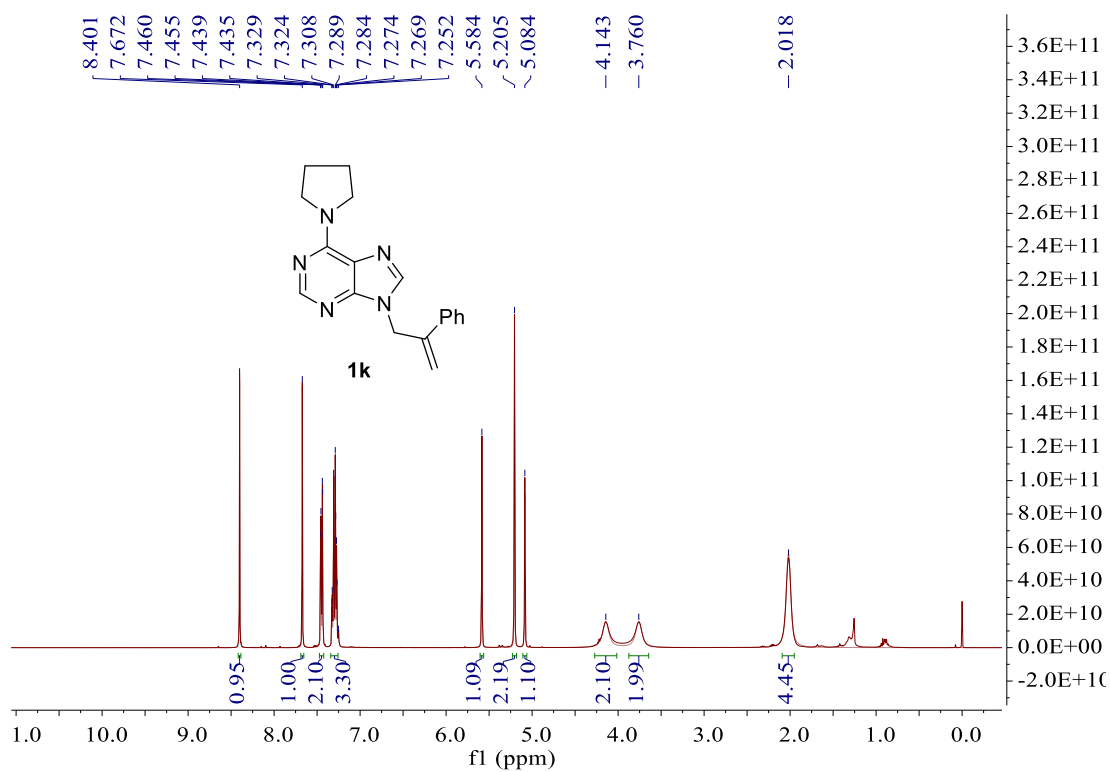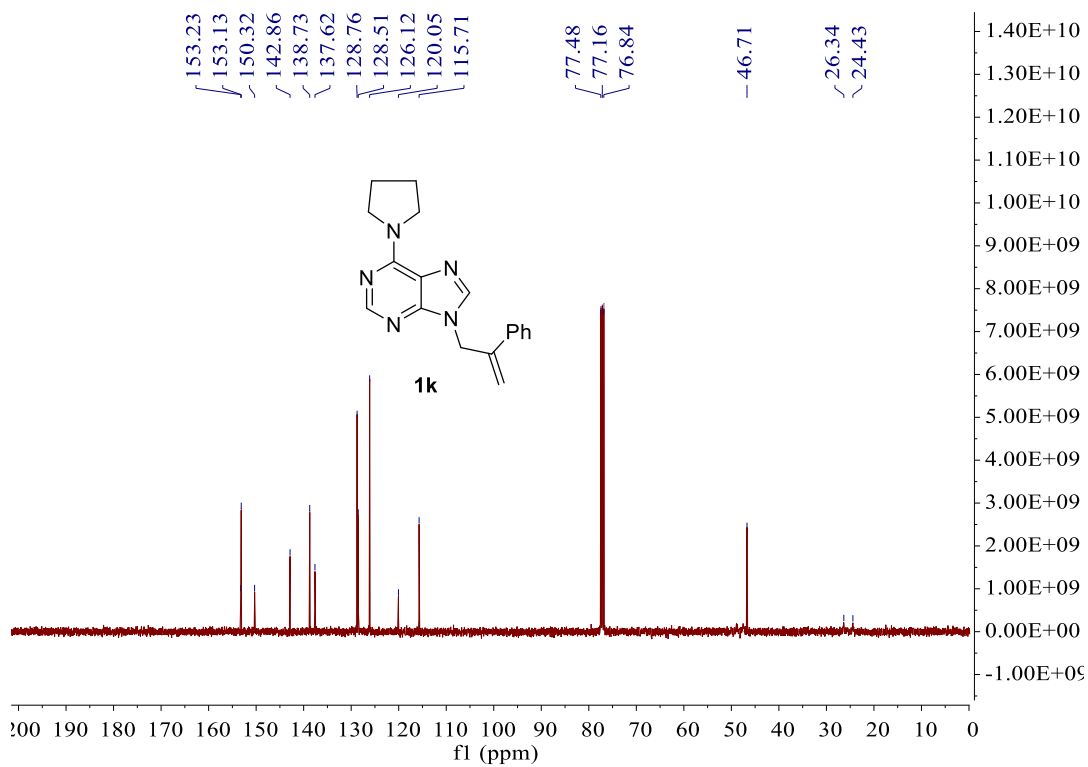

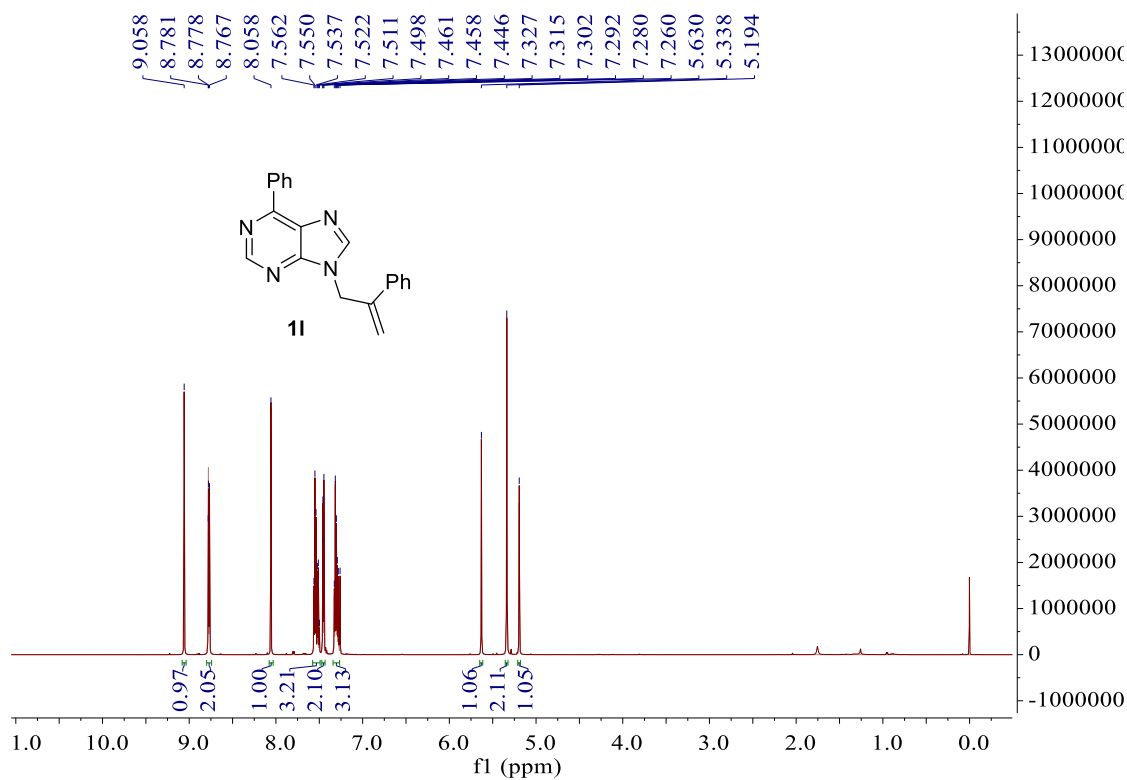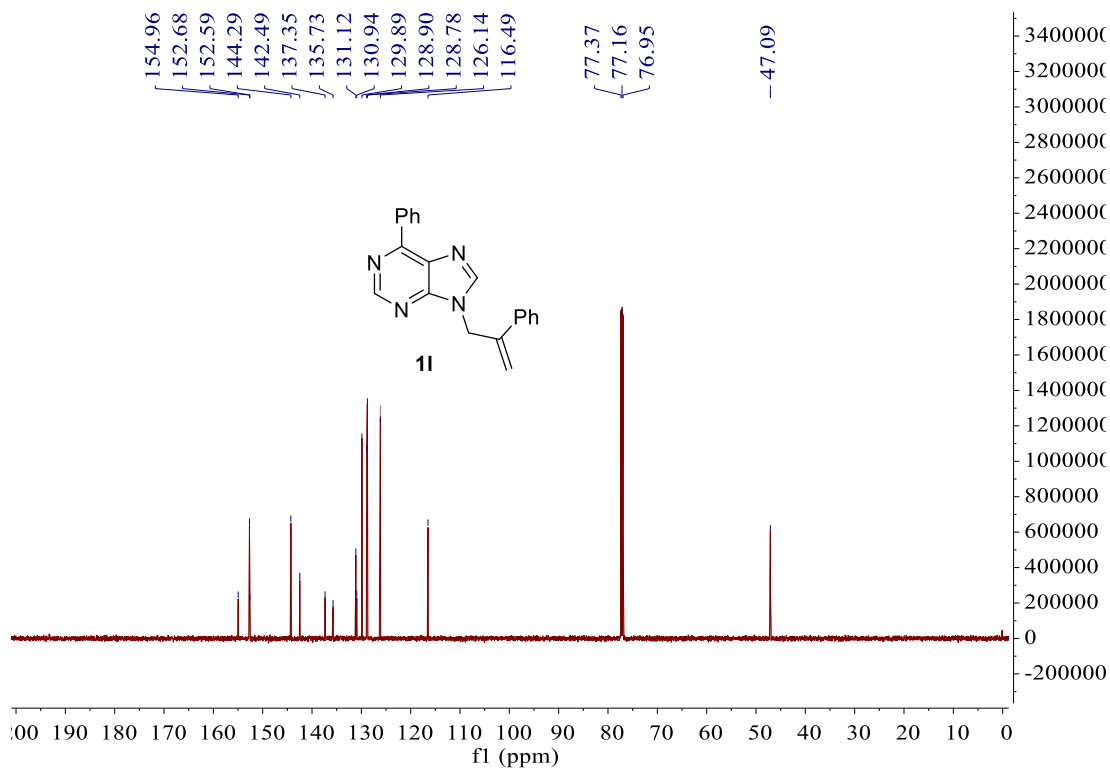

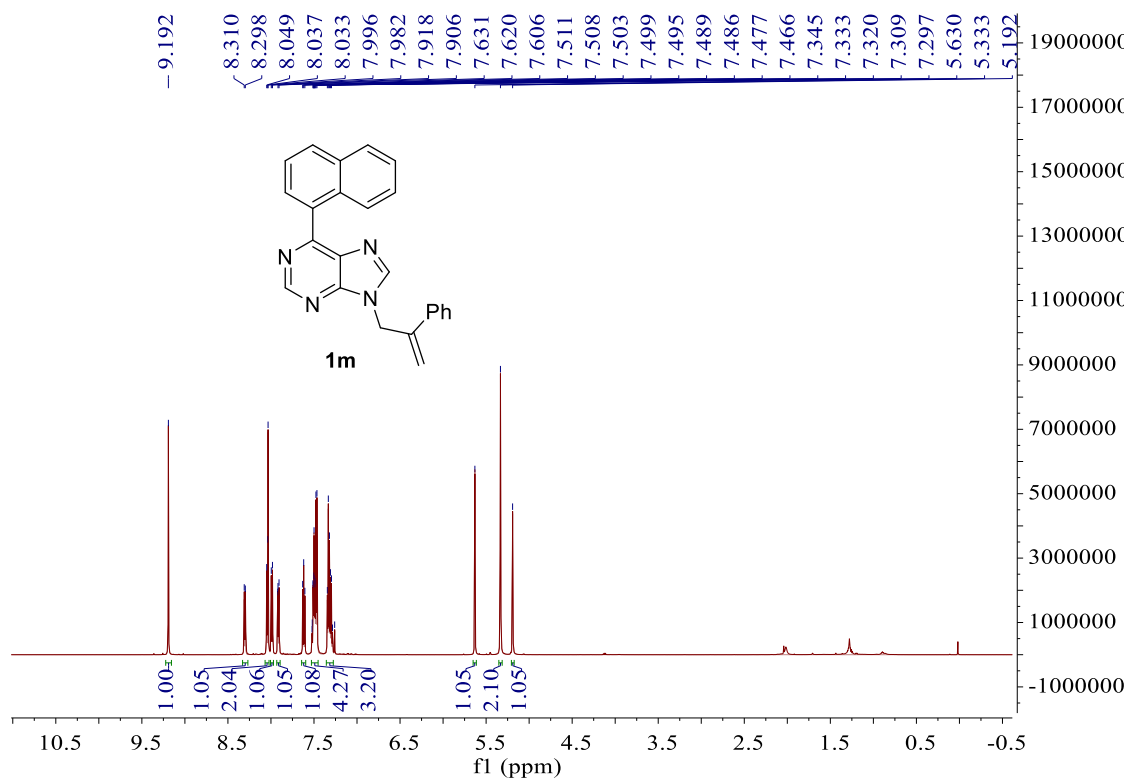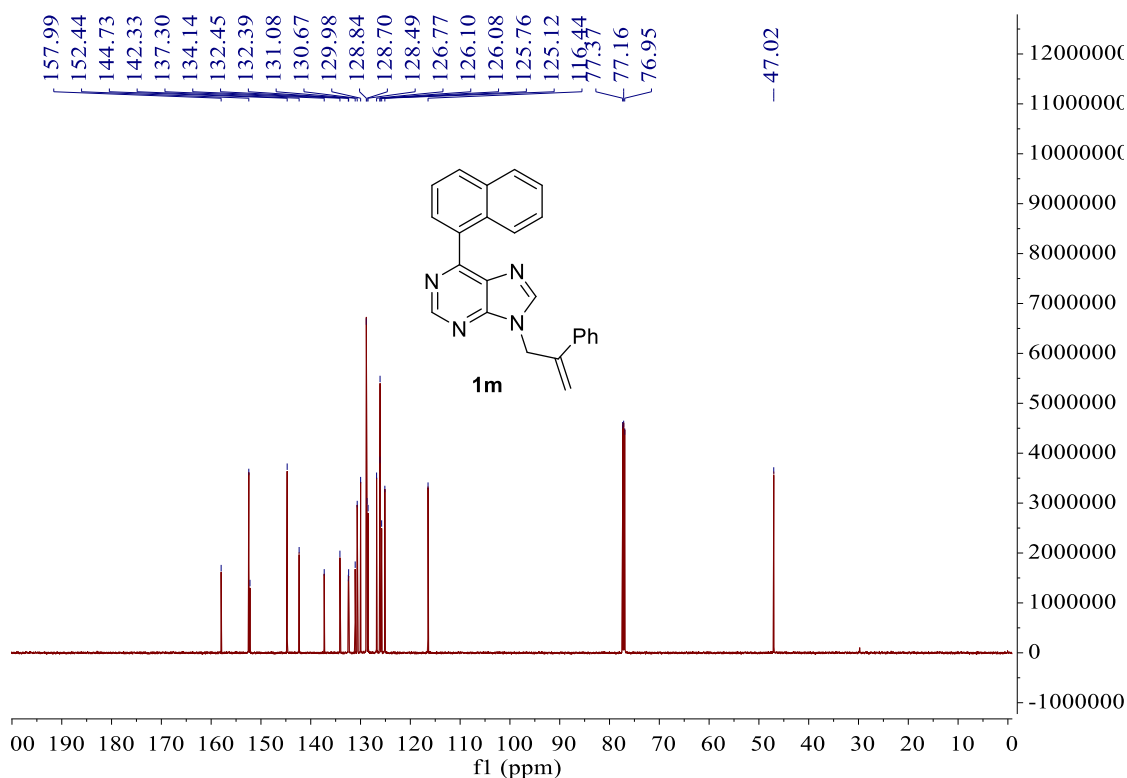

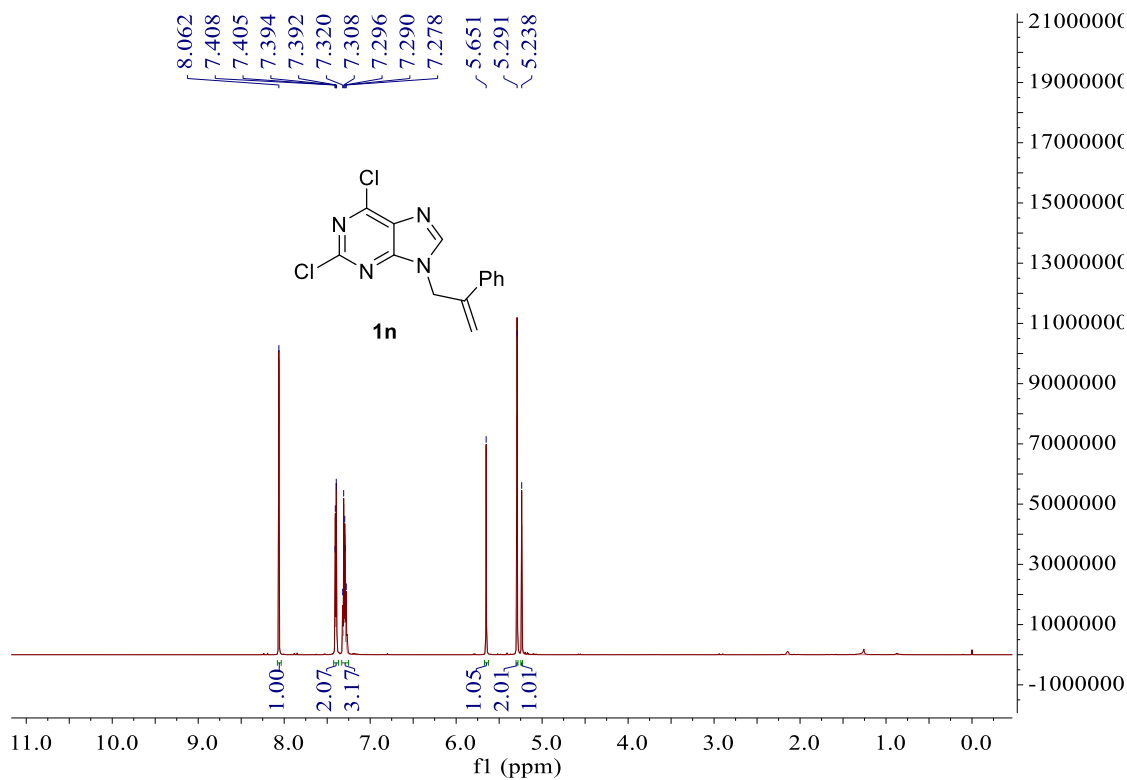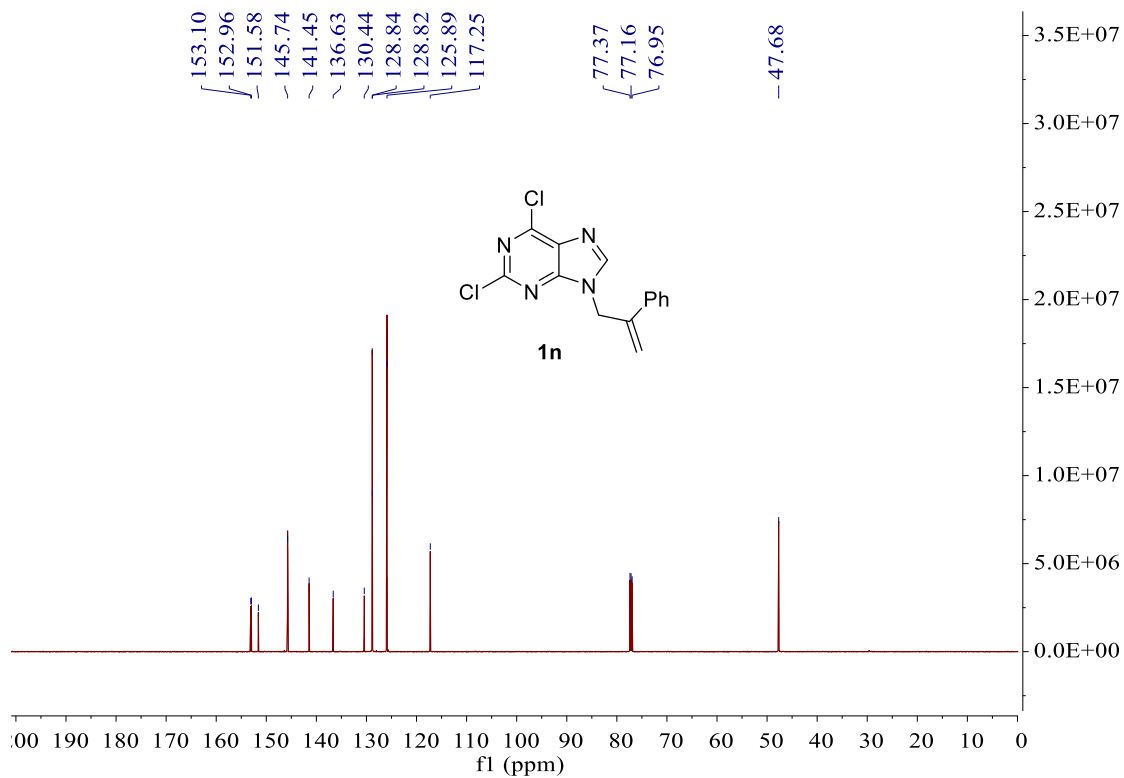

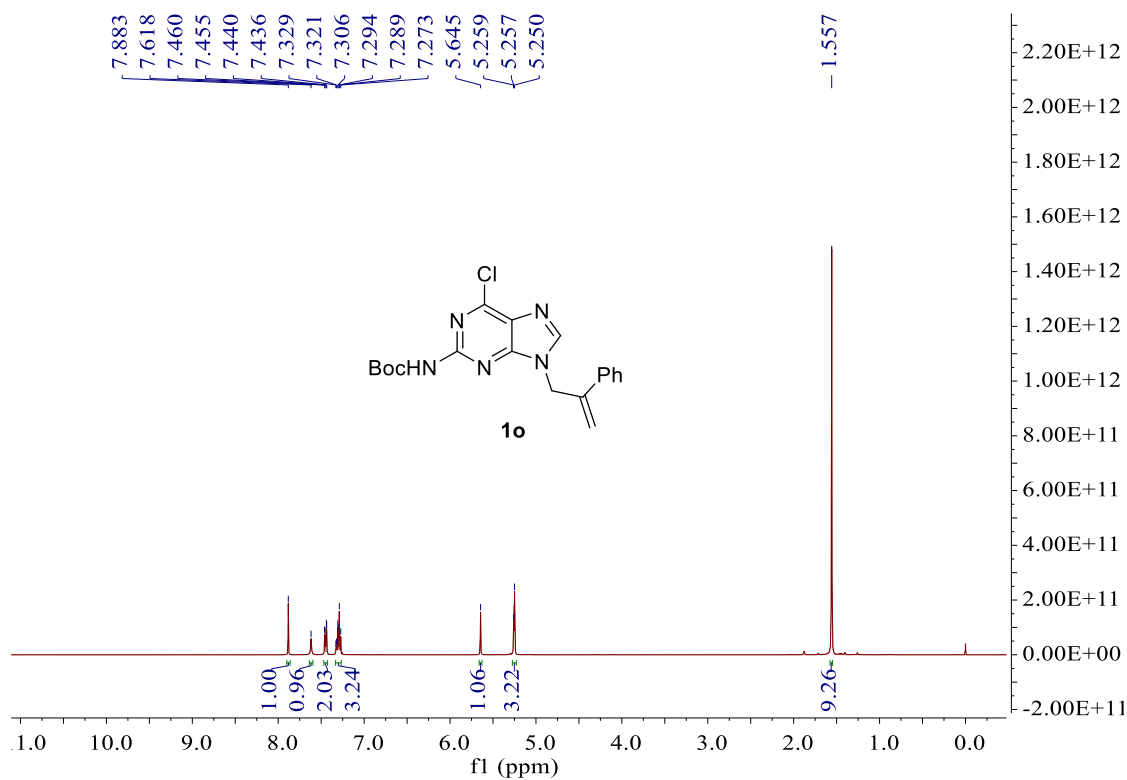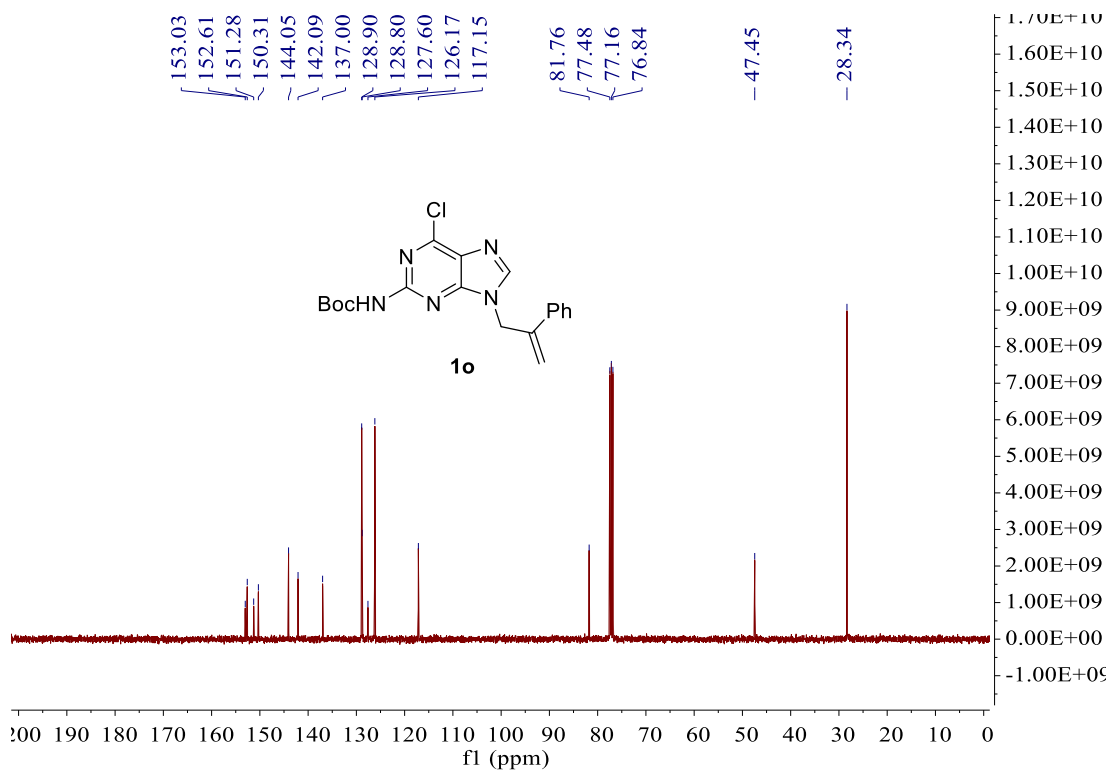

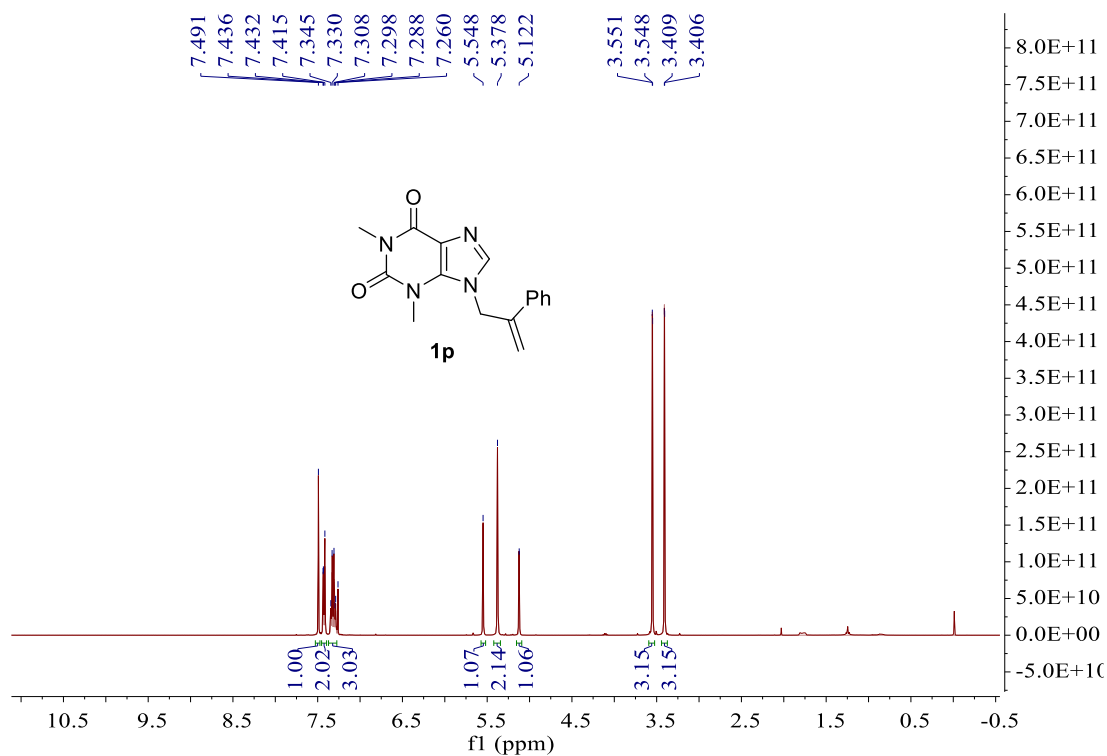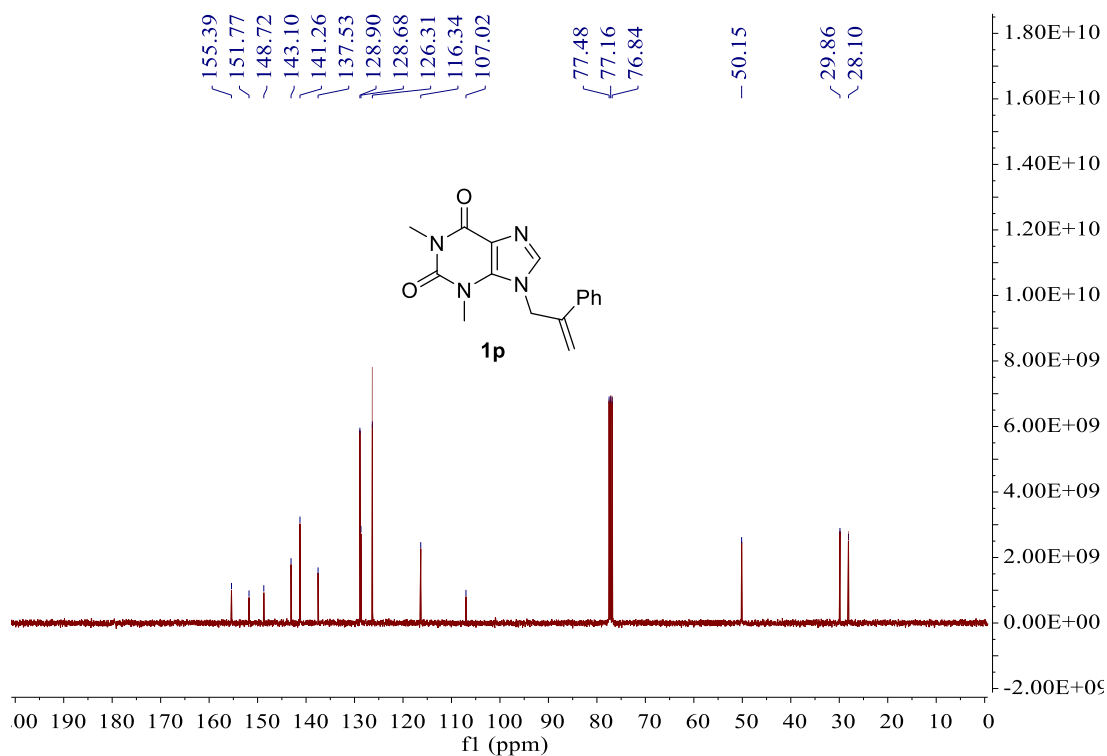

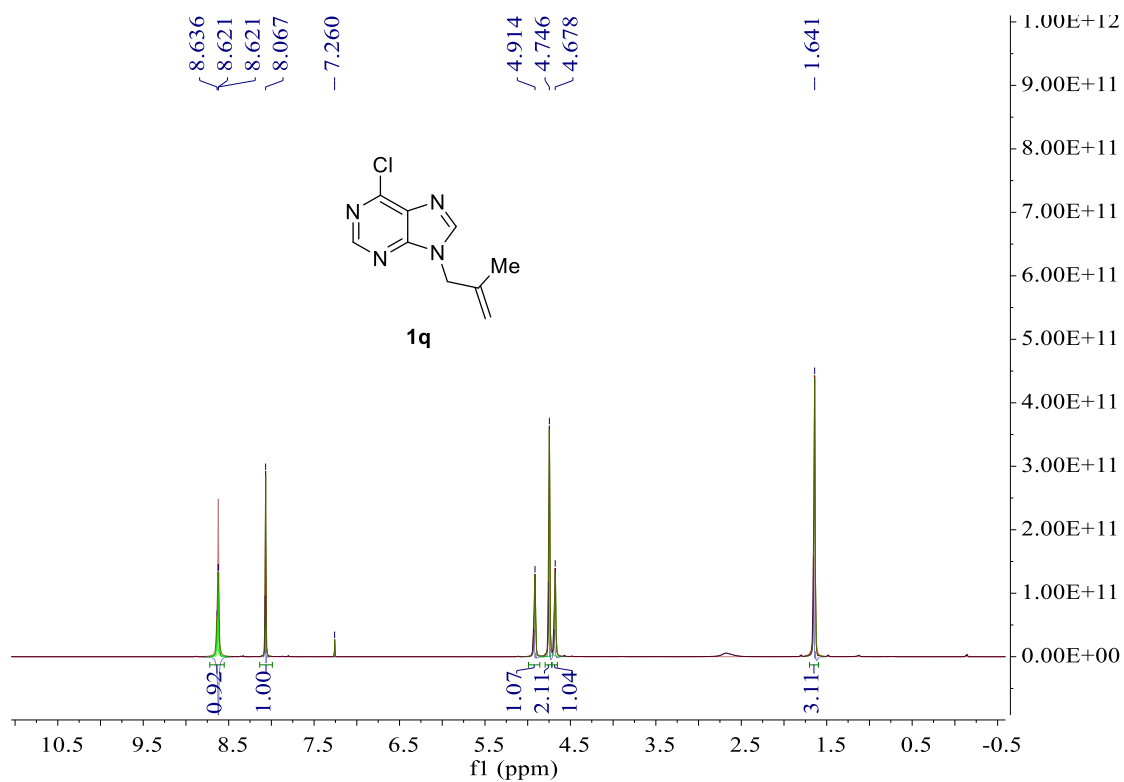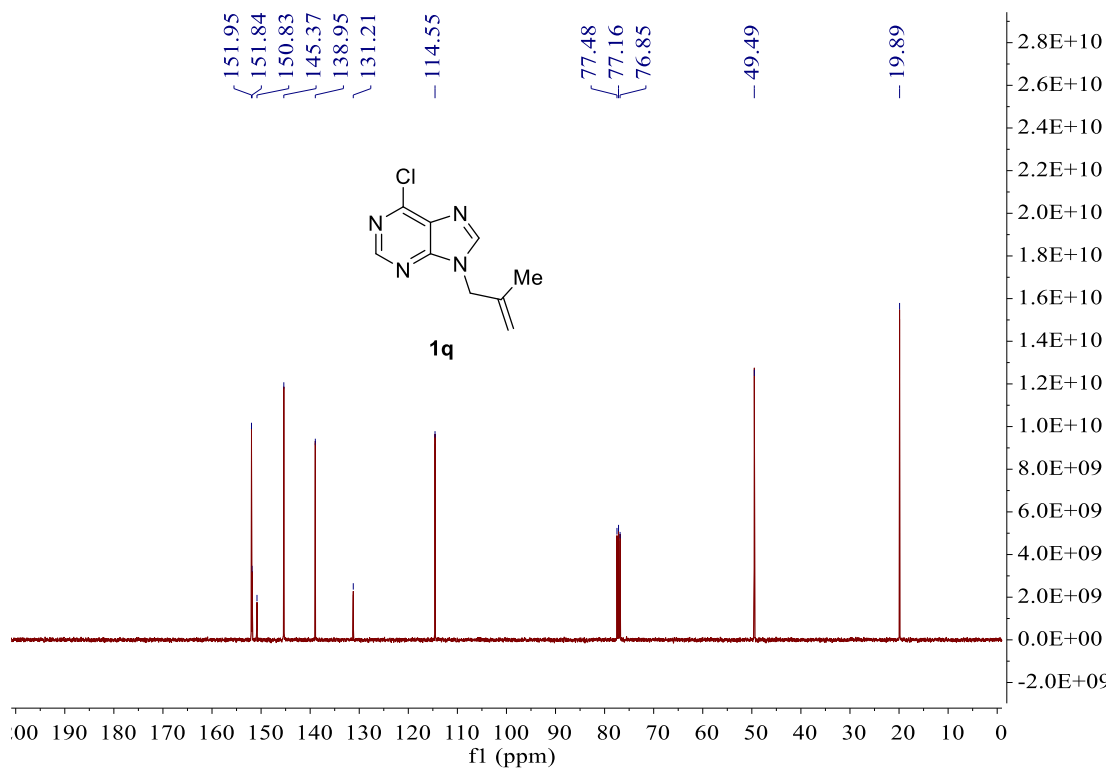

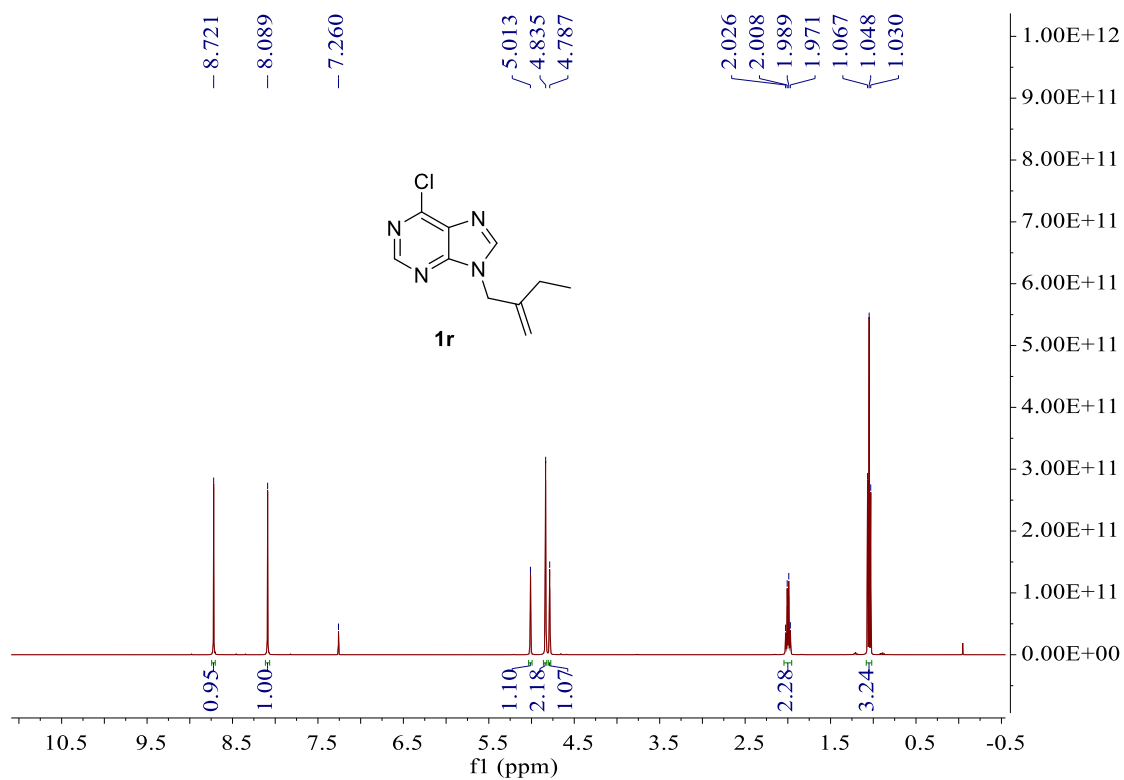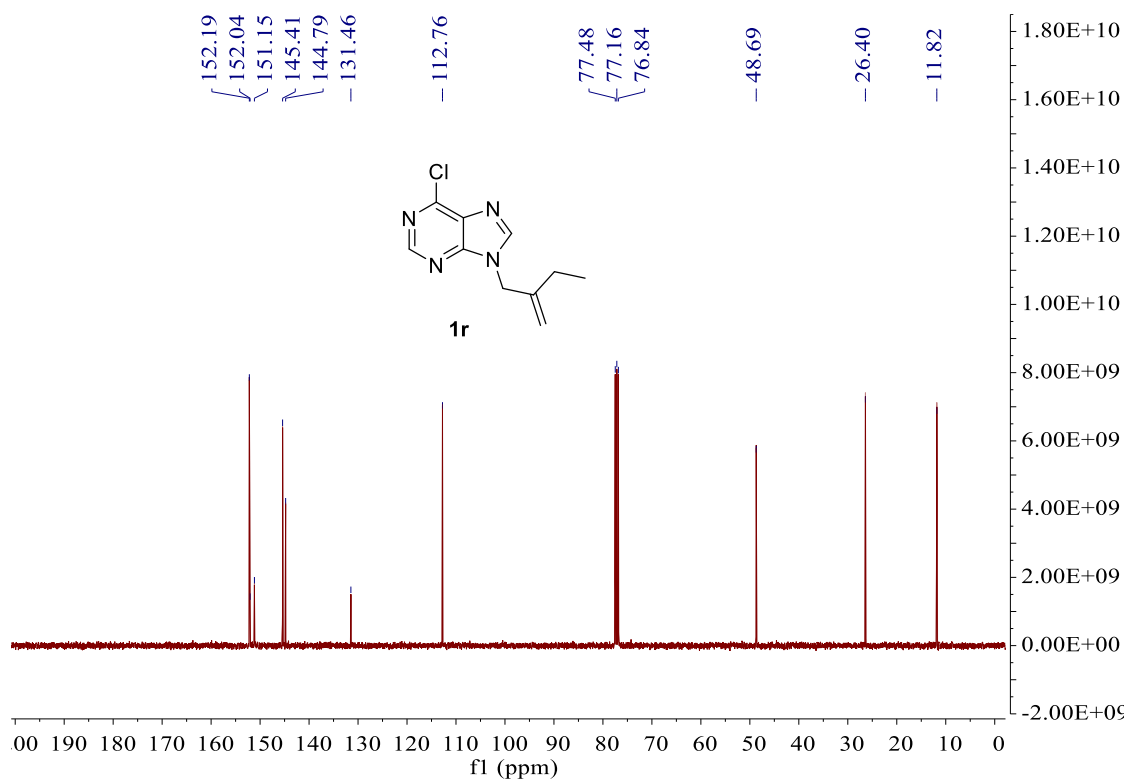

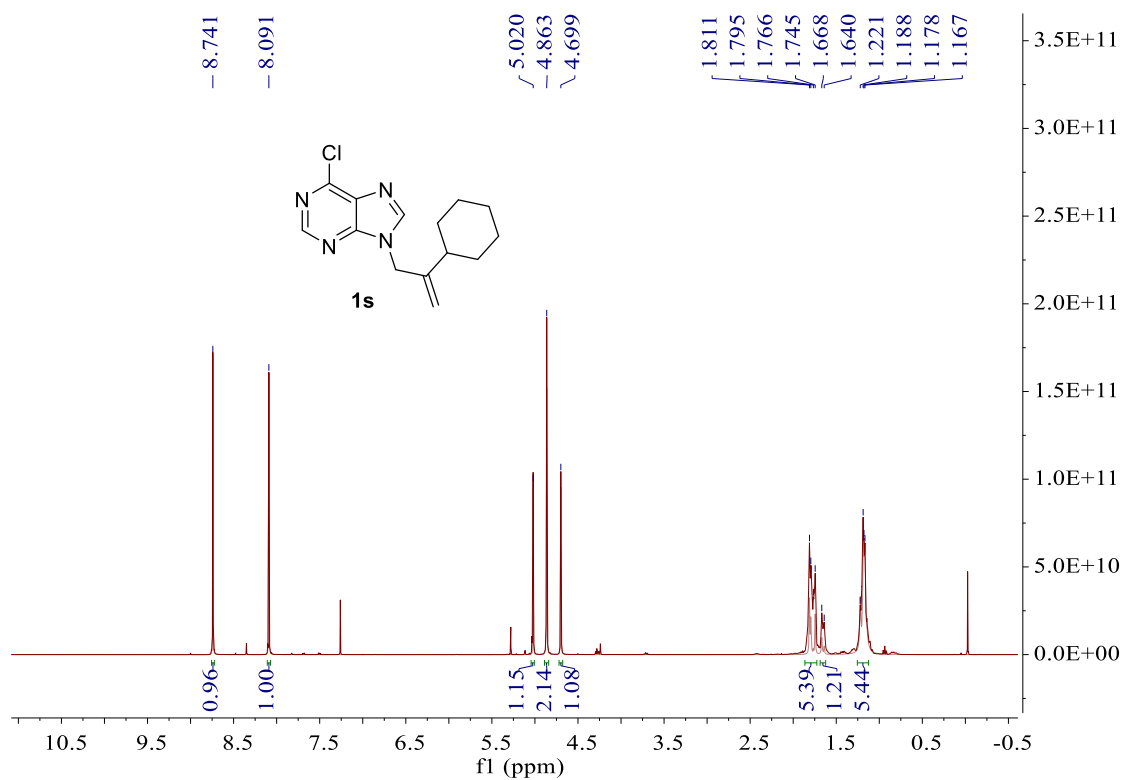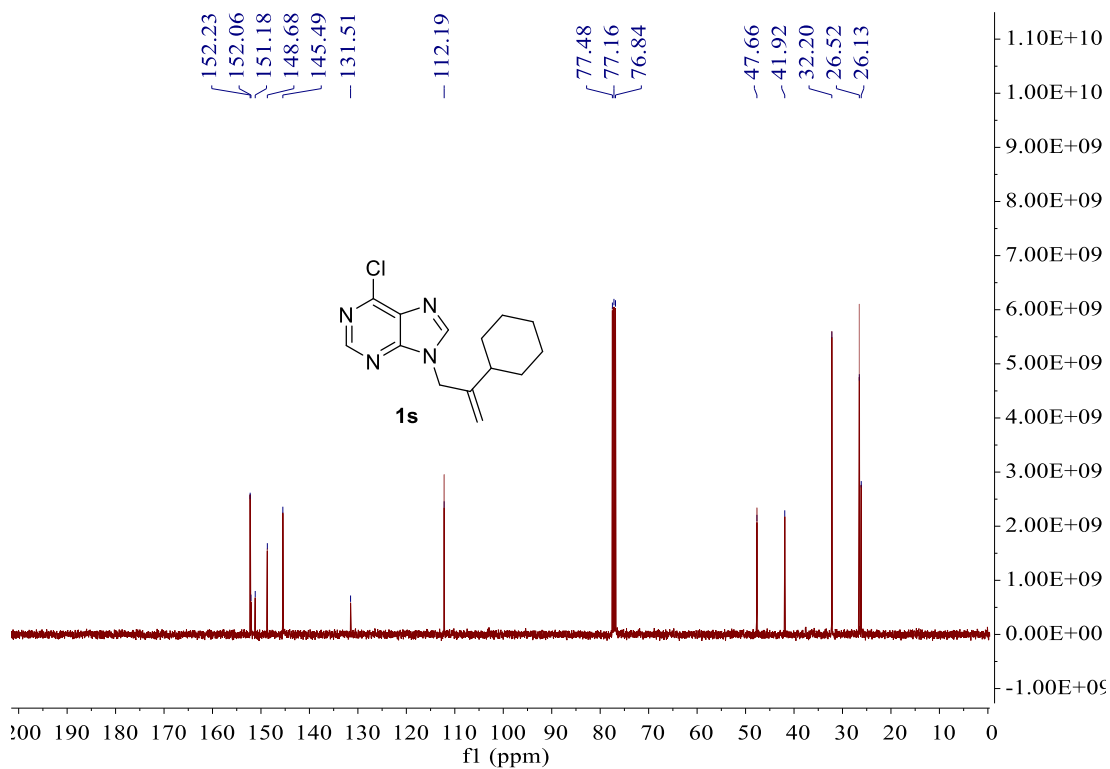

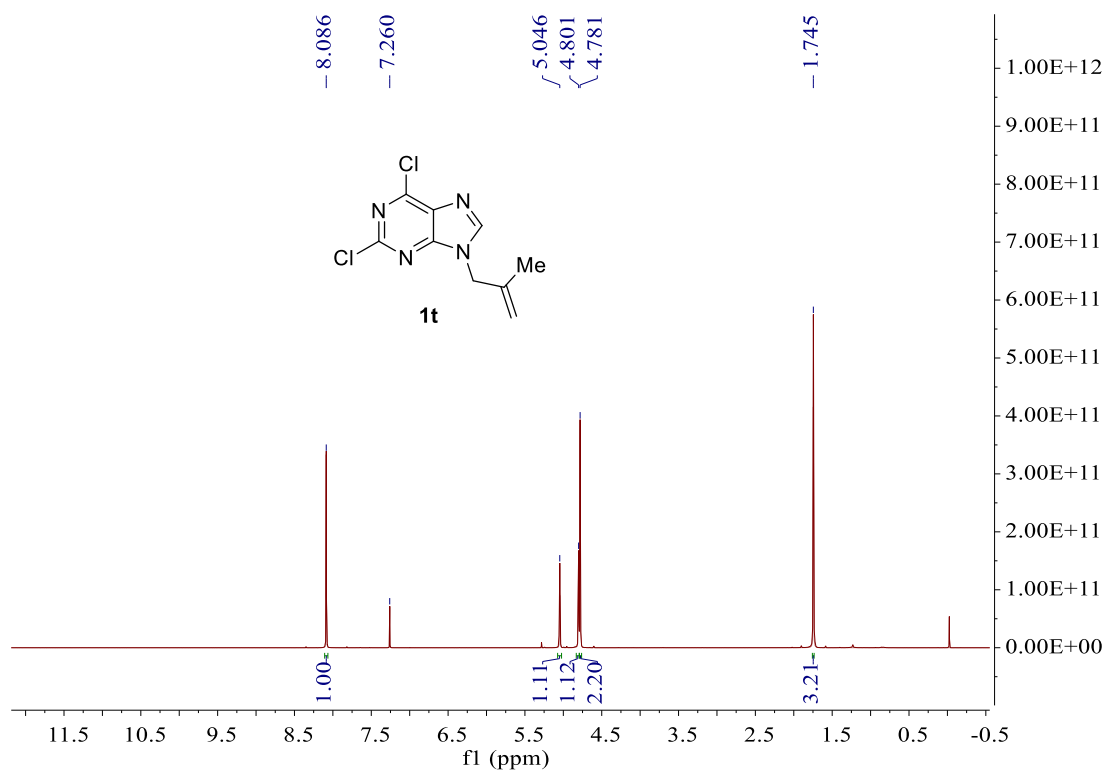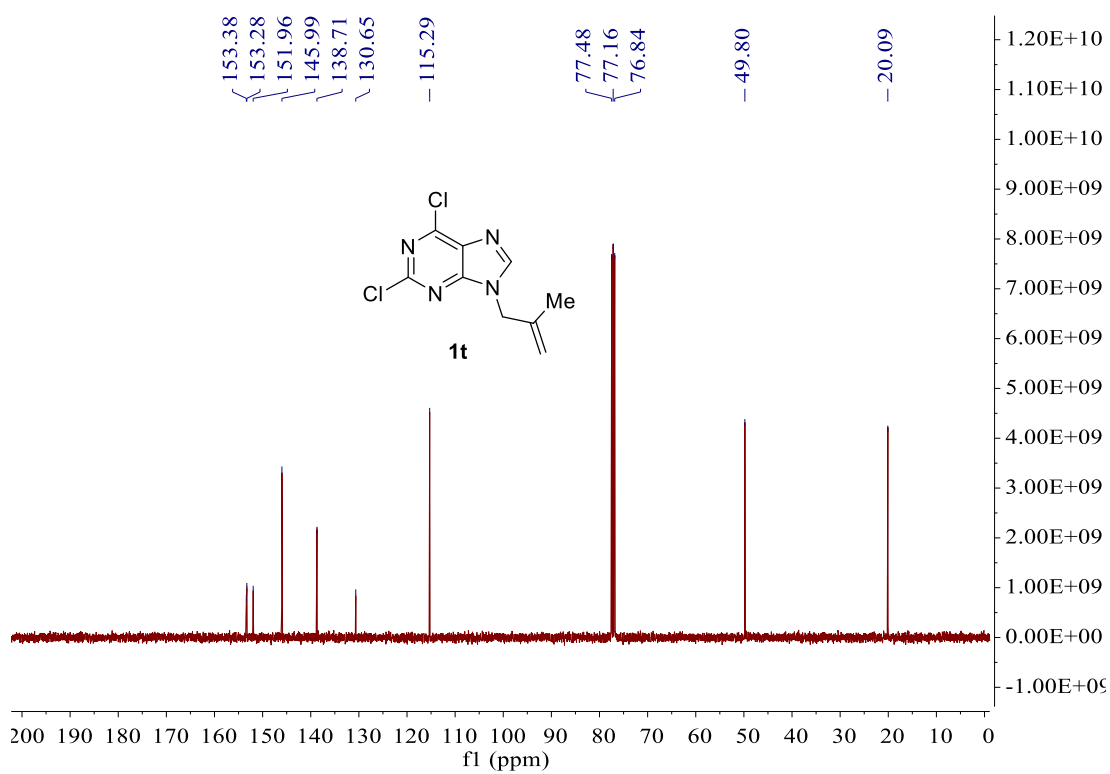

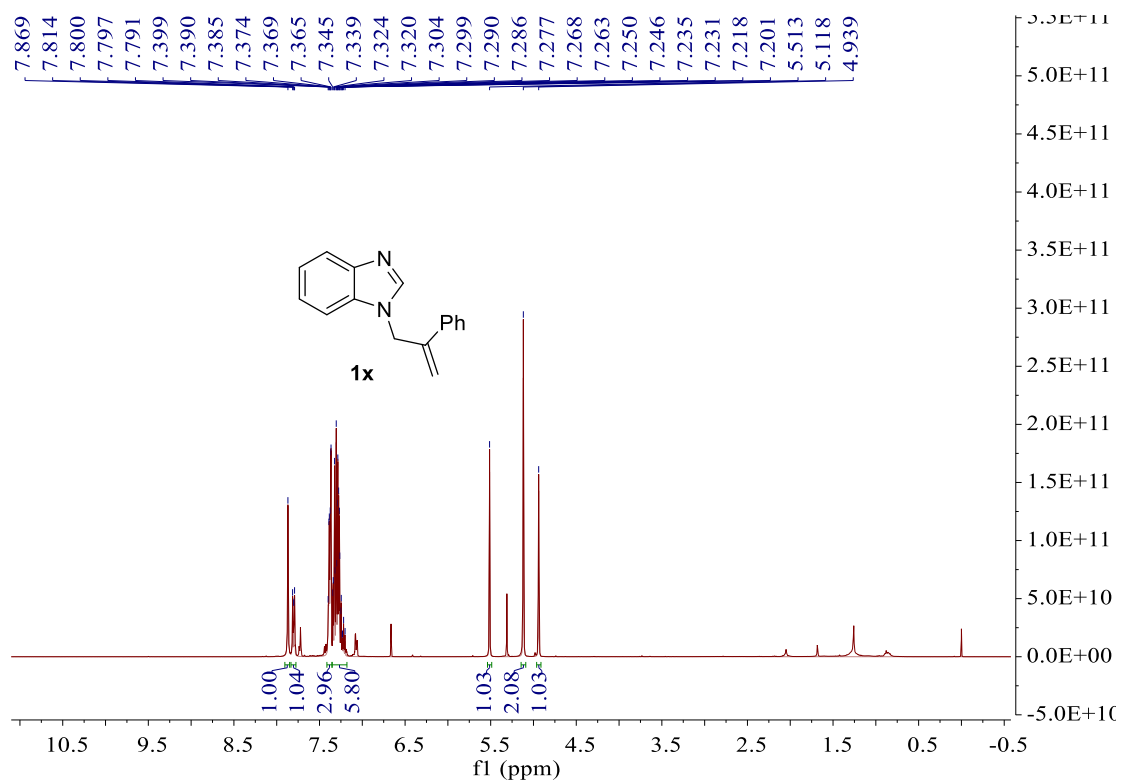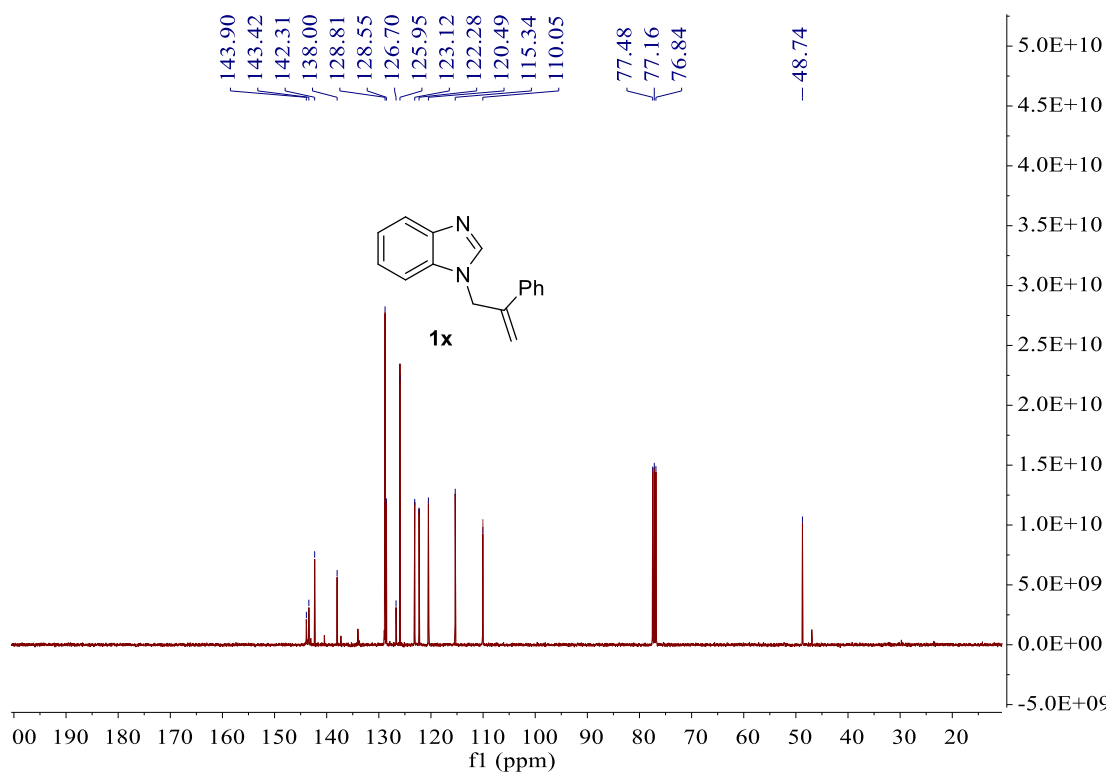

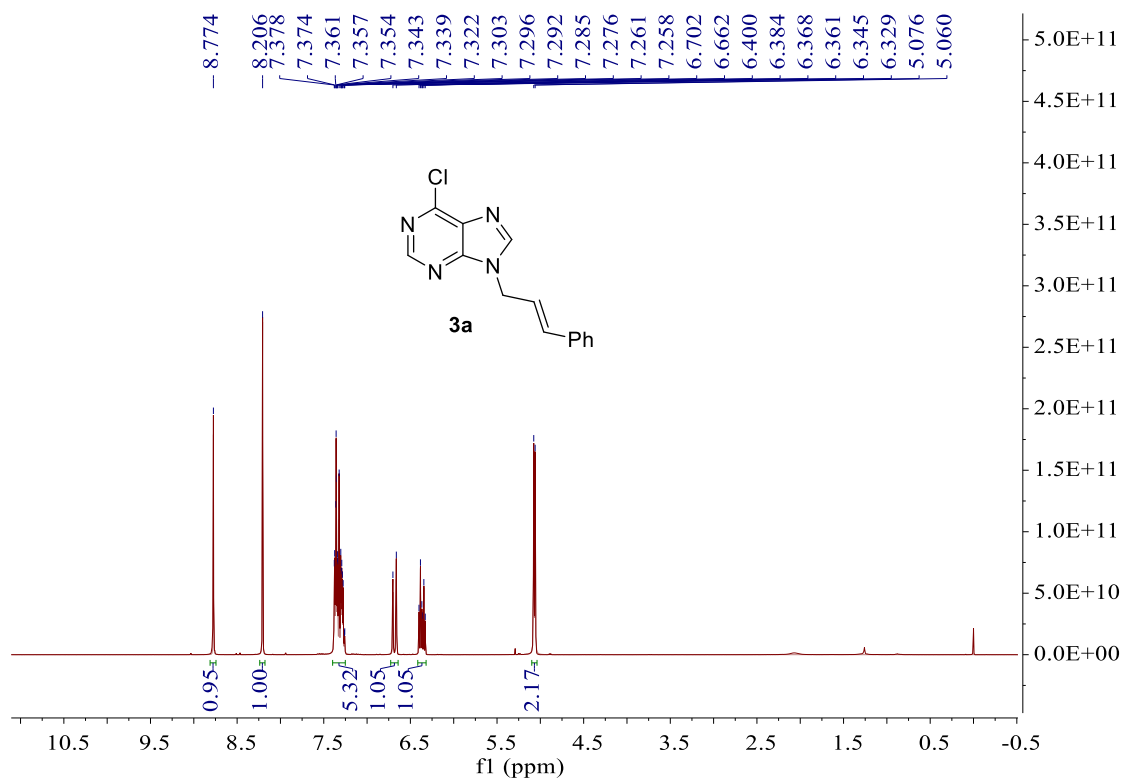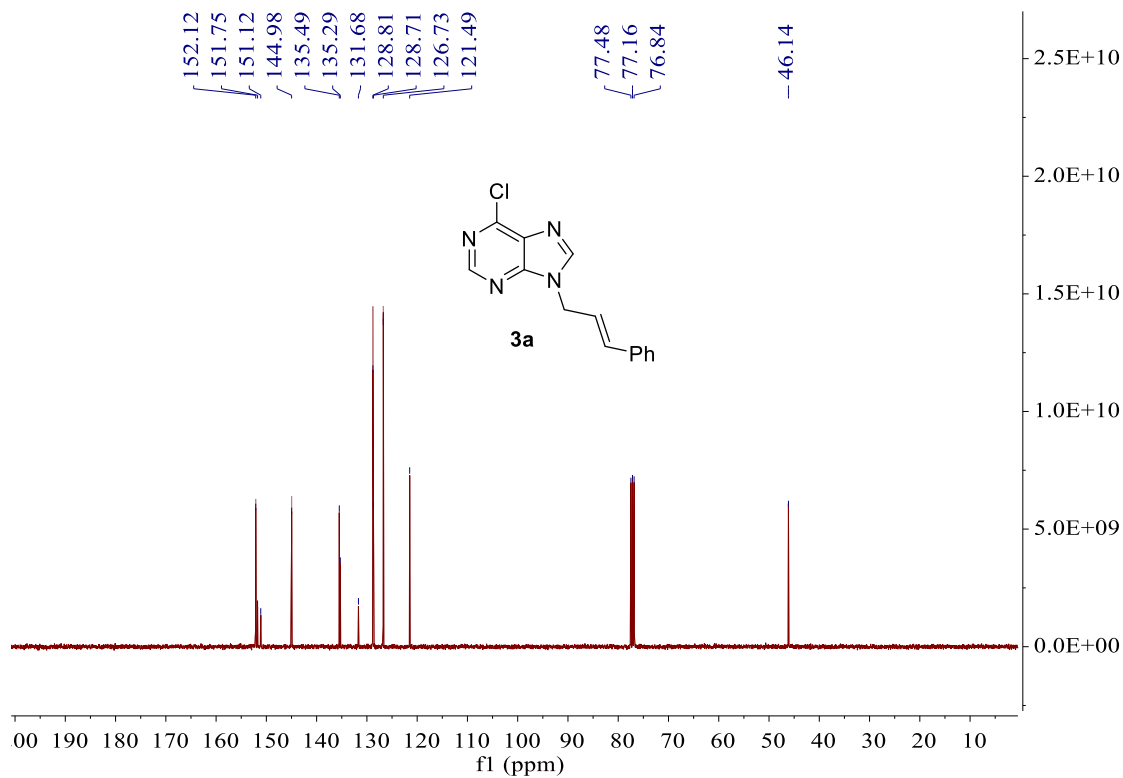

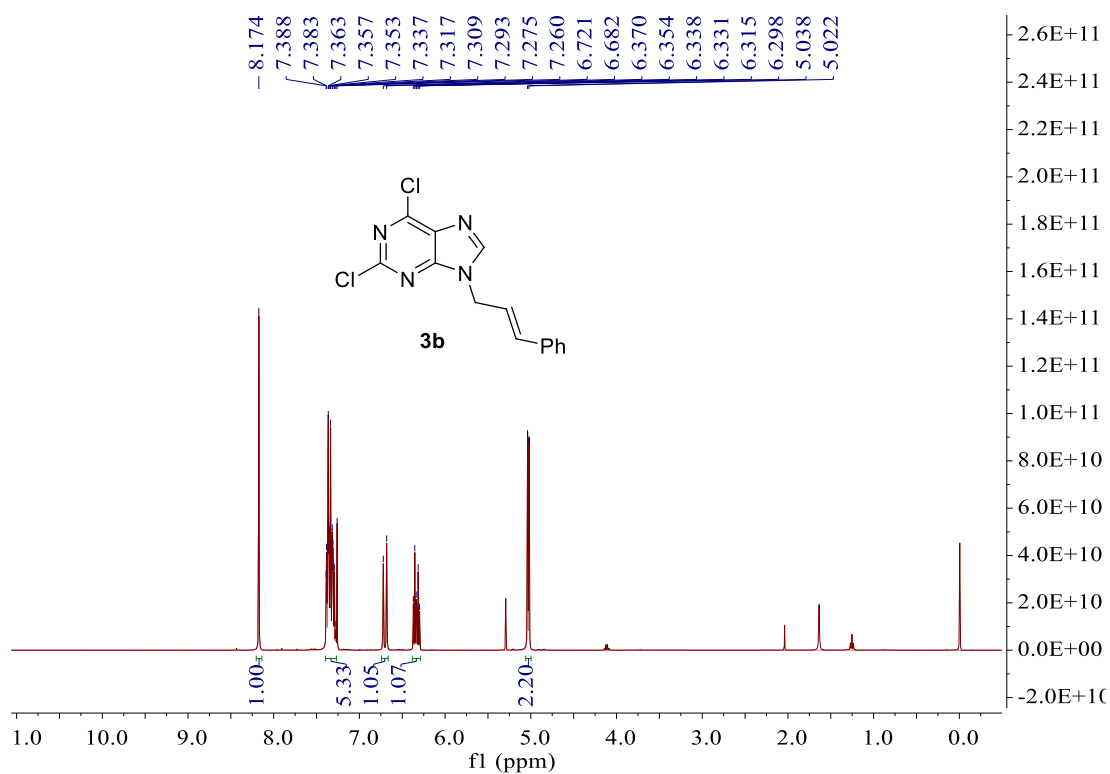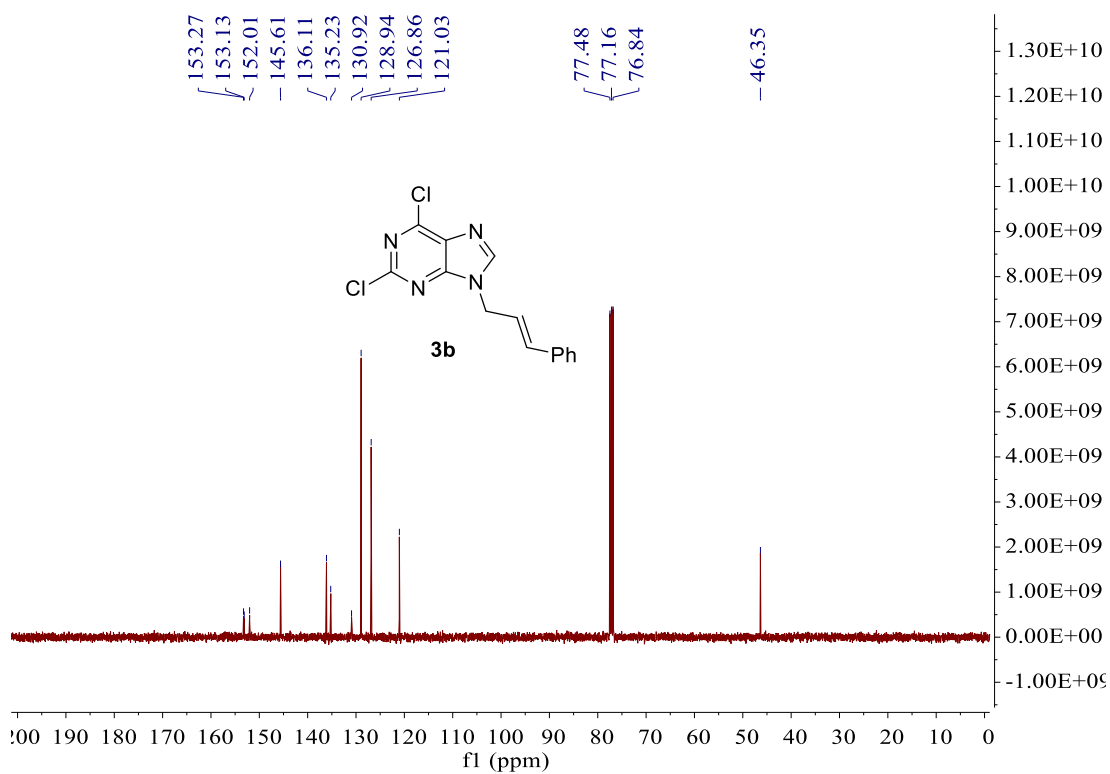

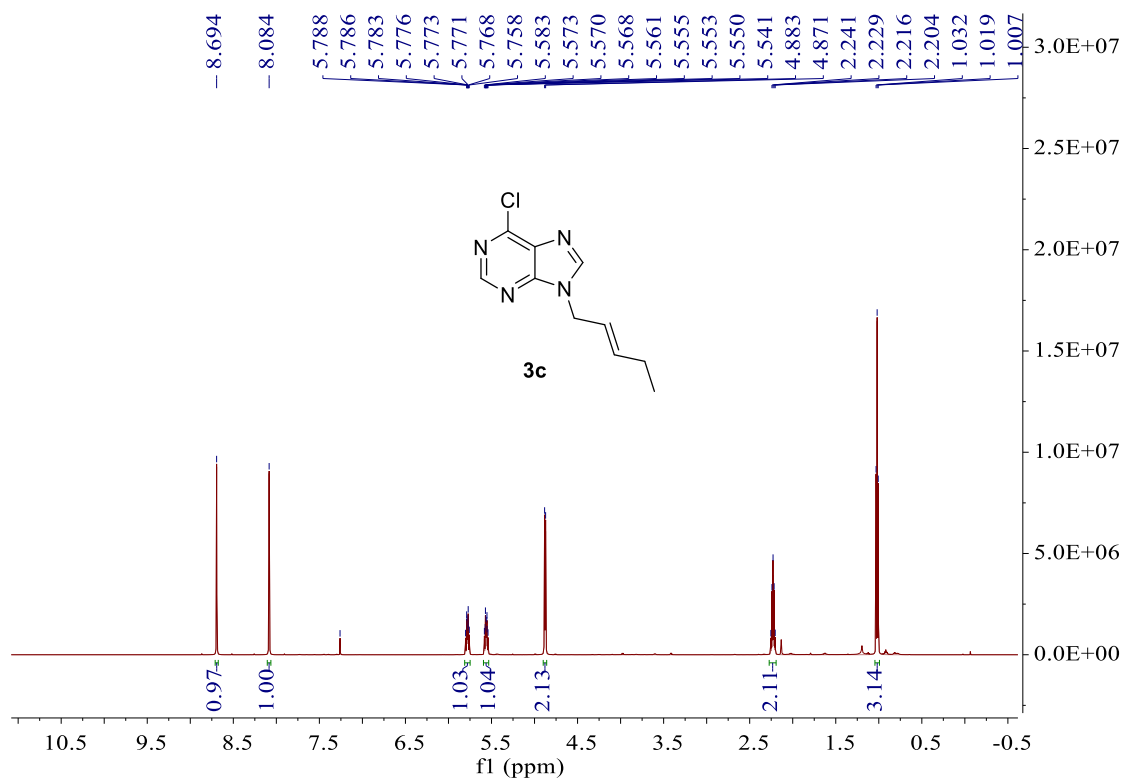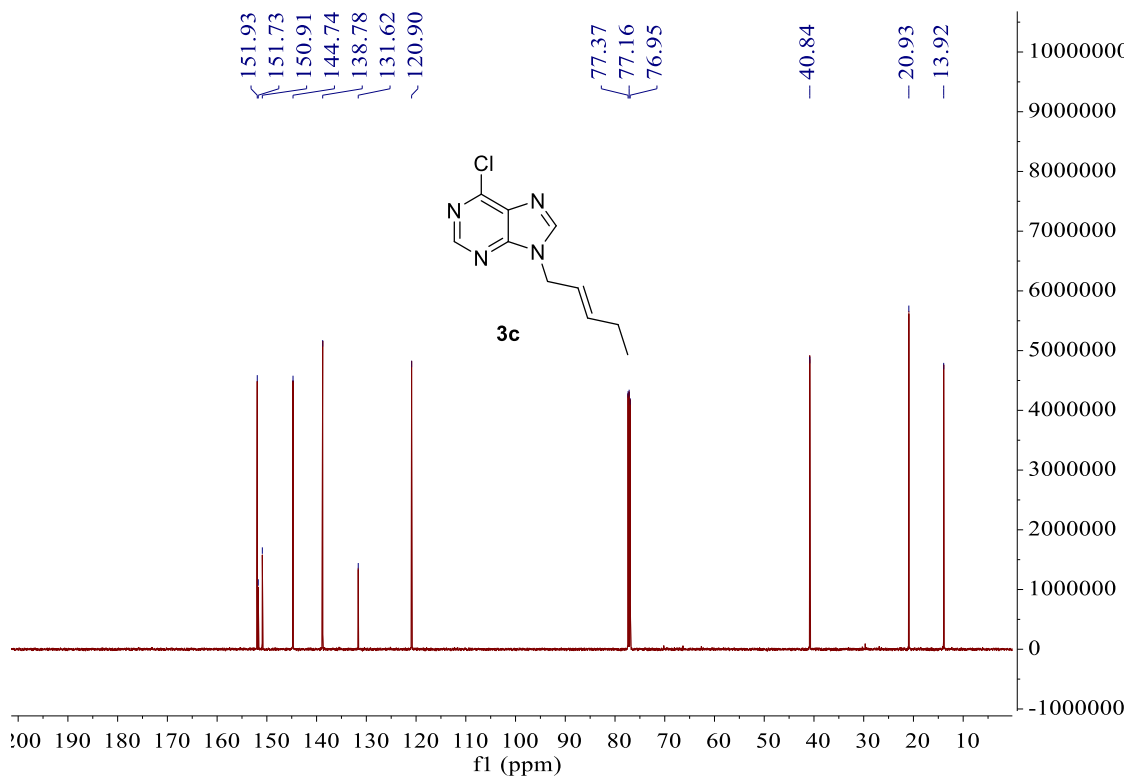

(2) Copies of NMR spectra of products

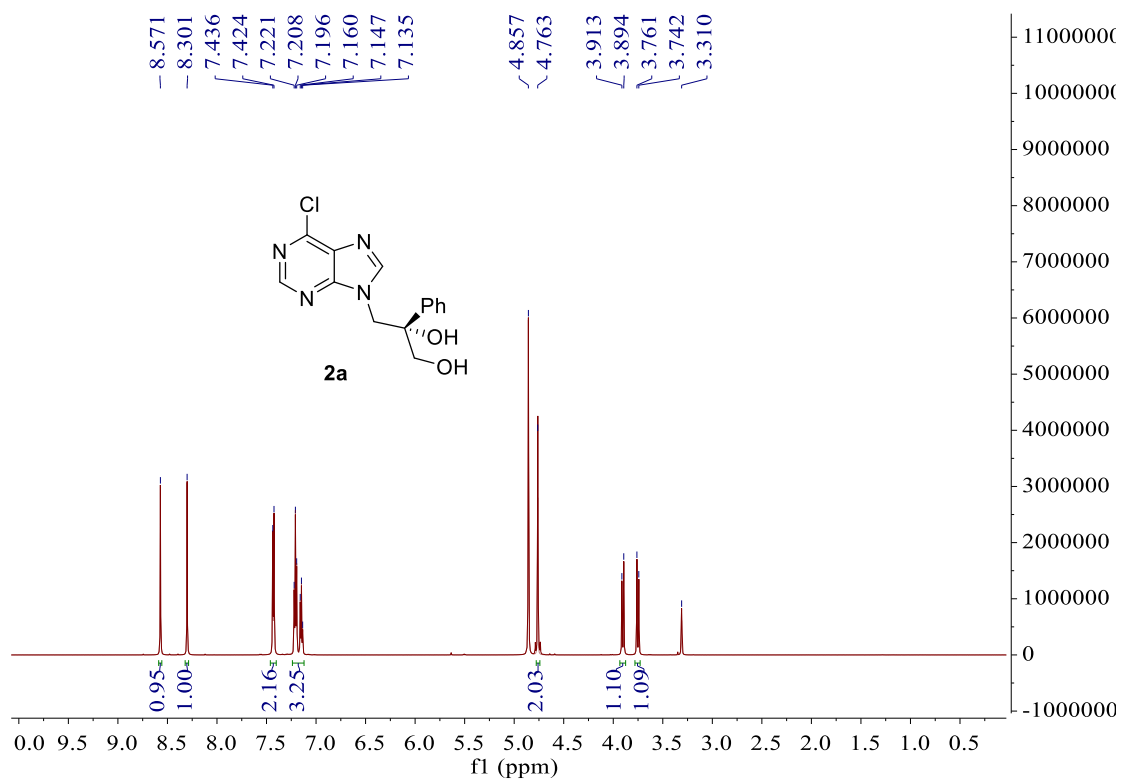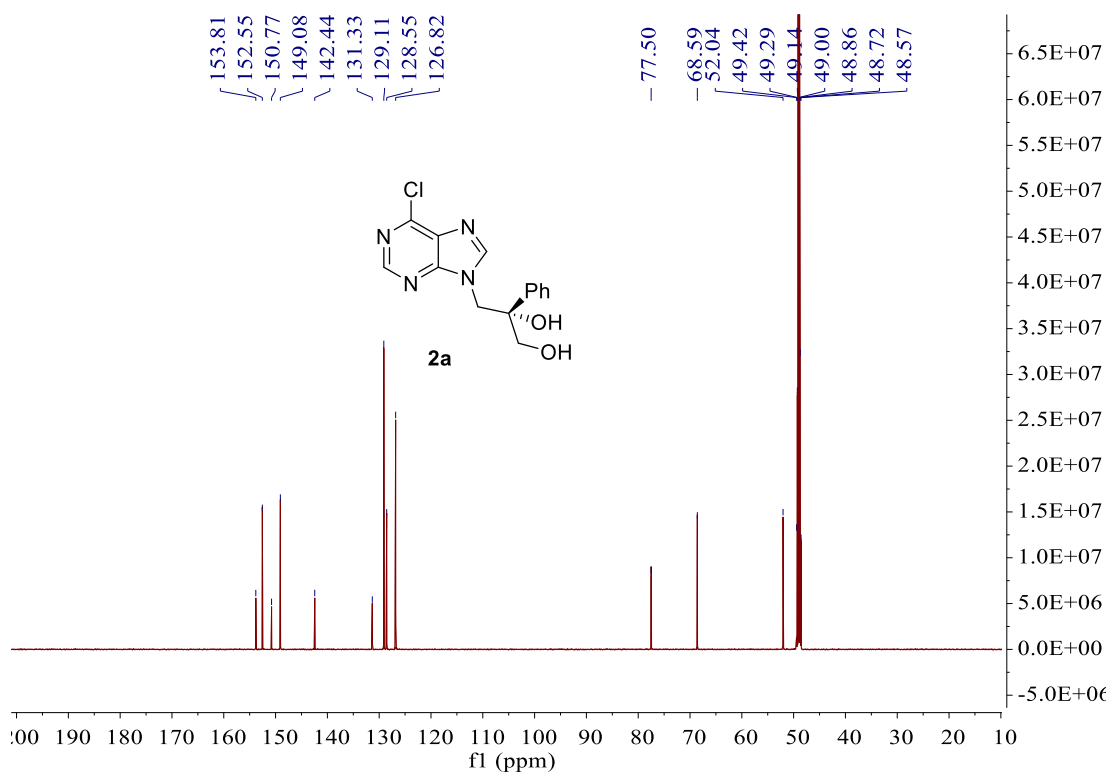

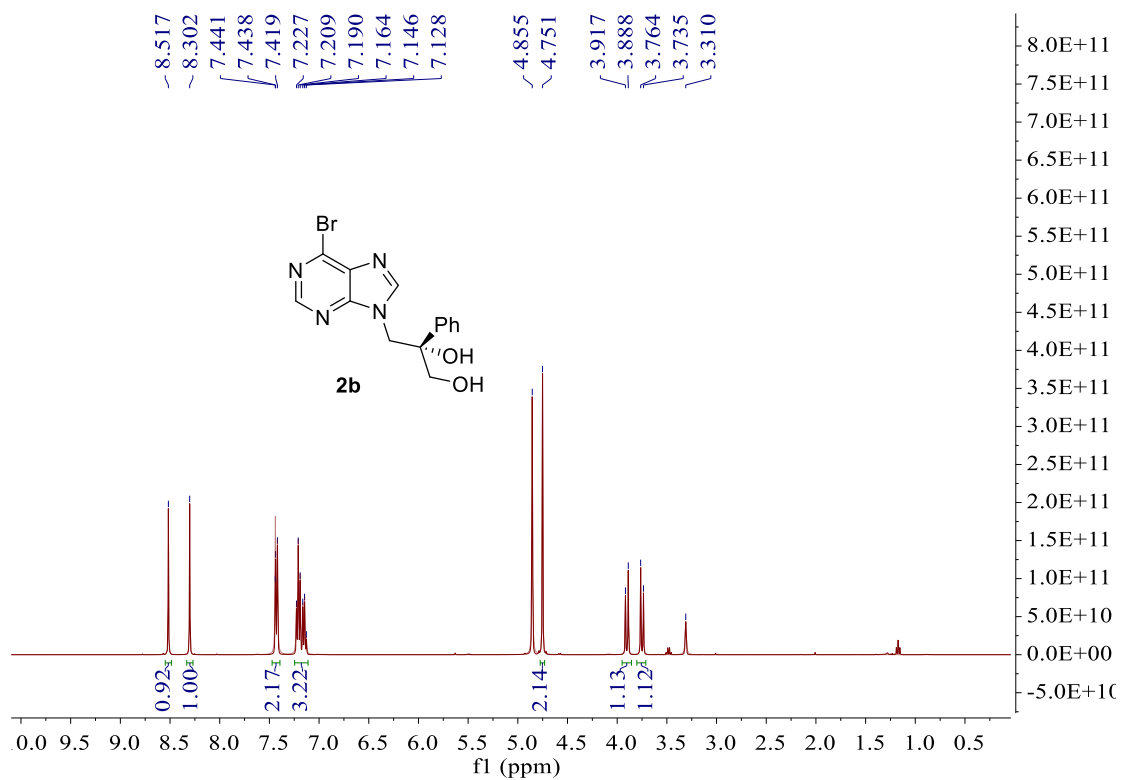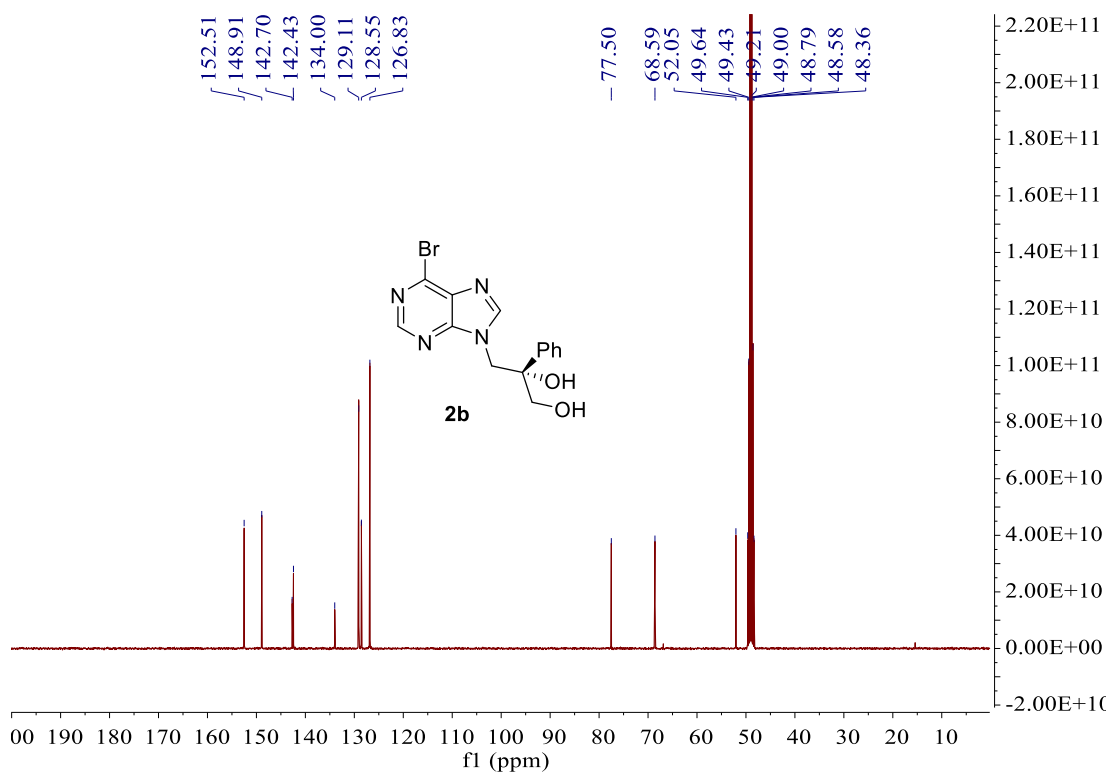

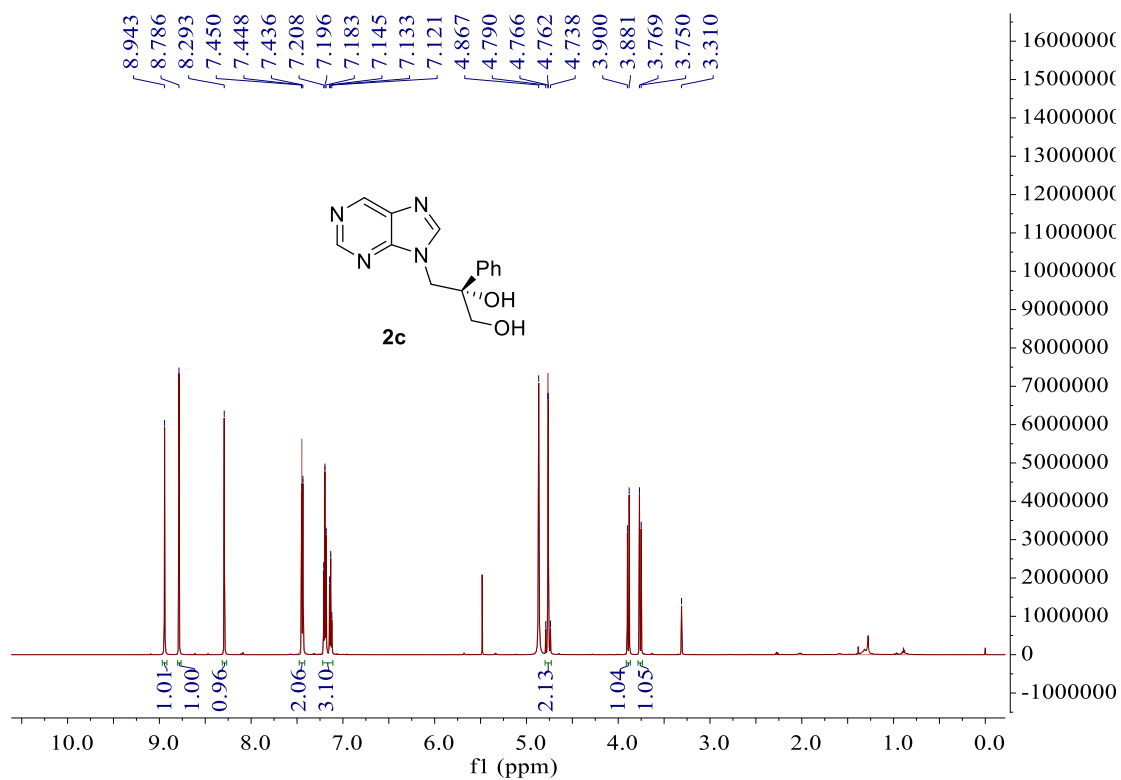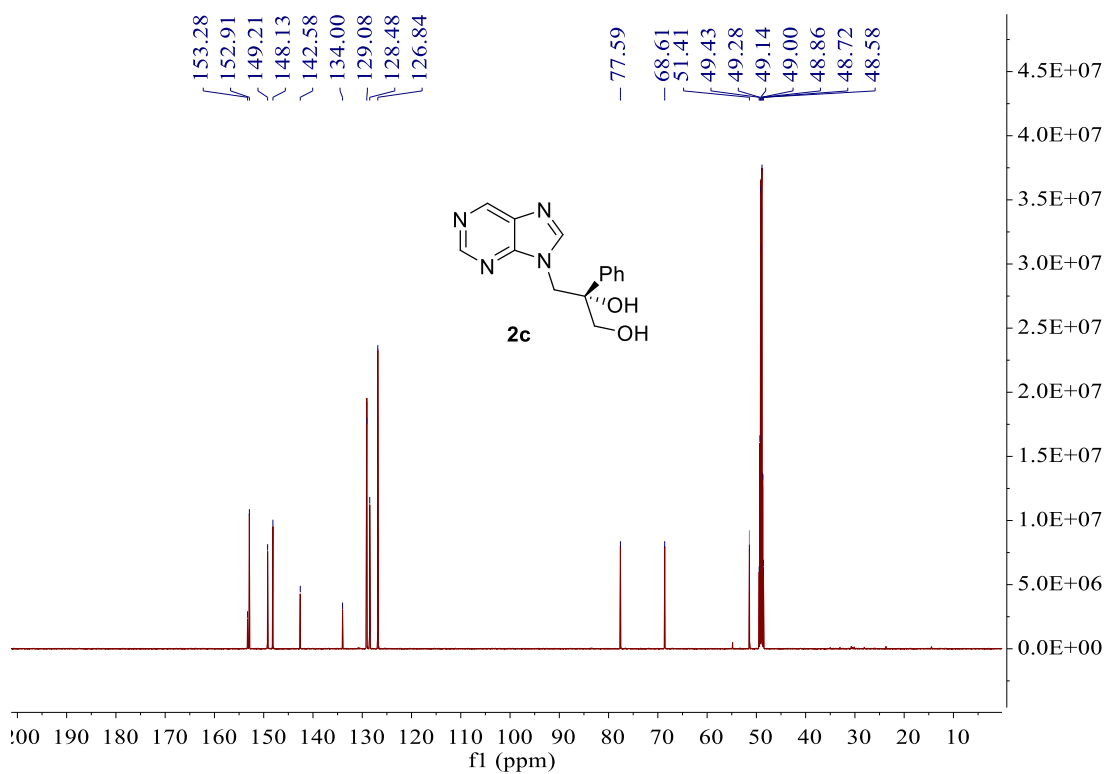

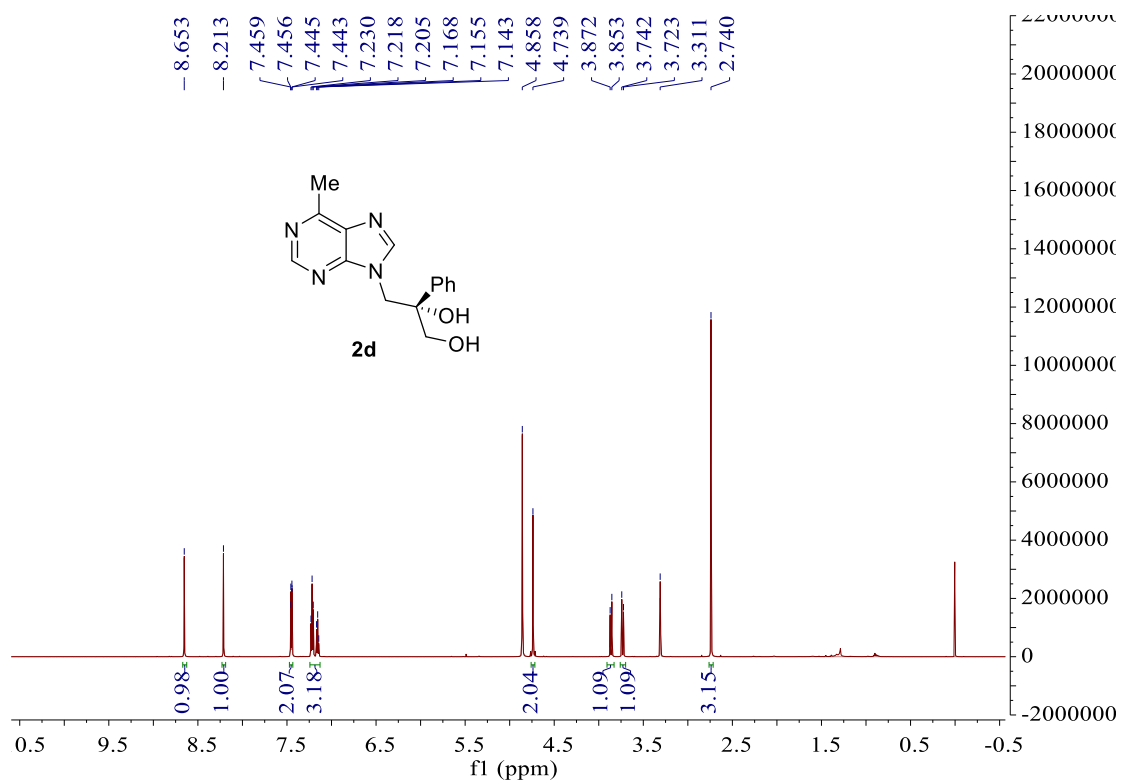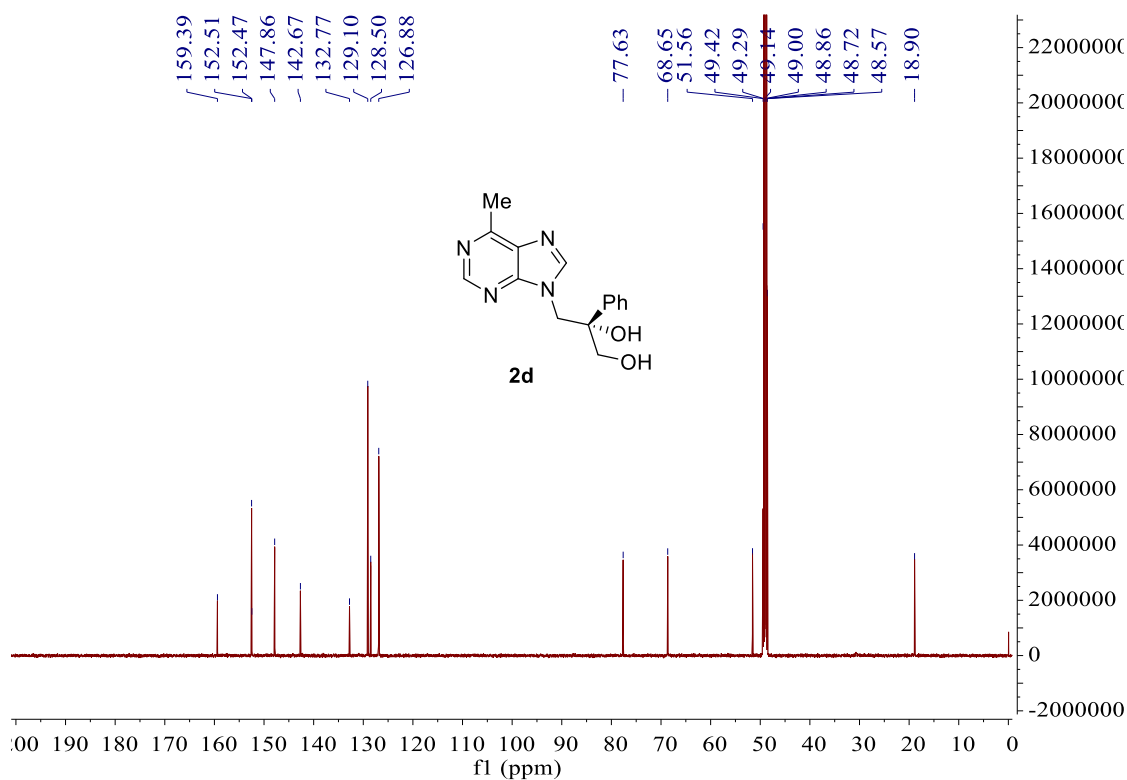

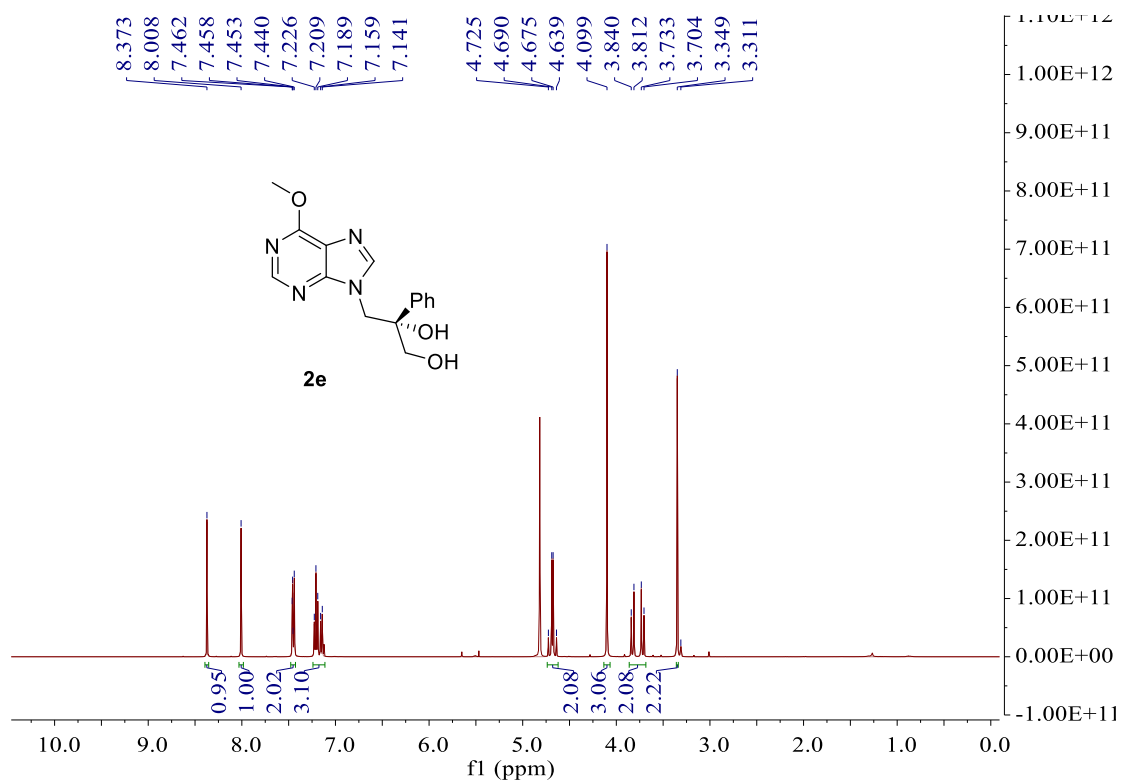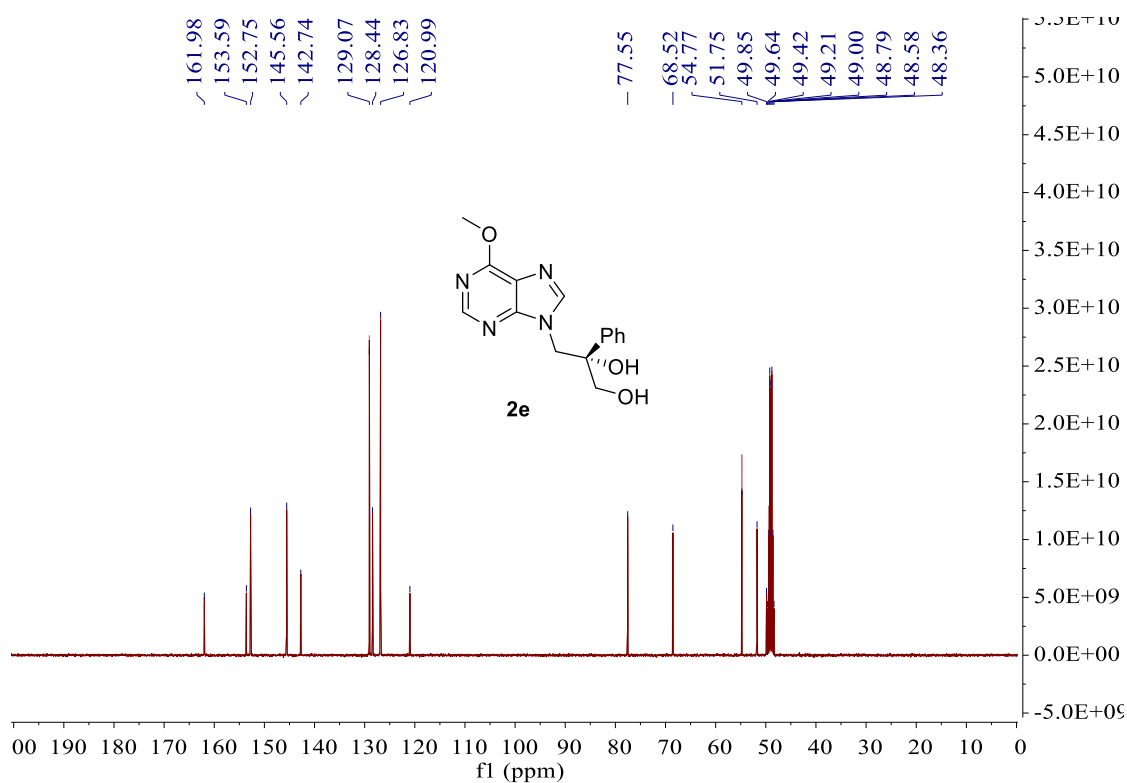

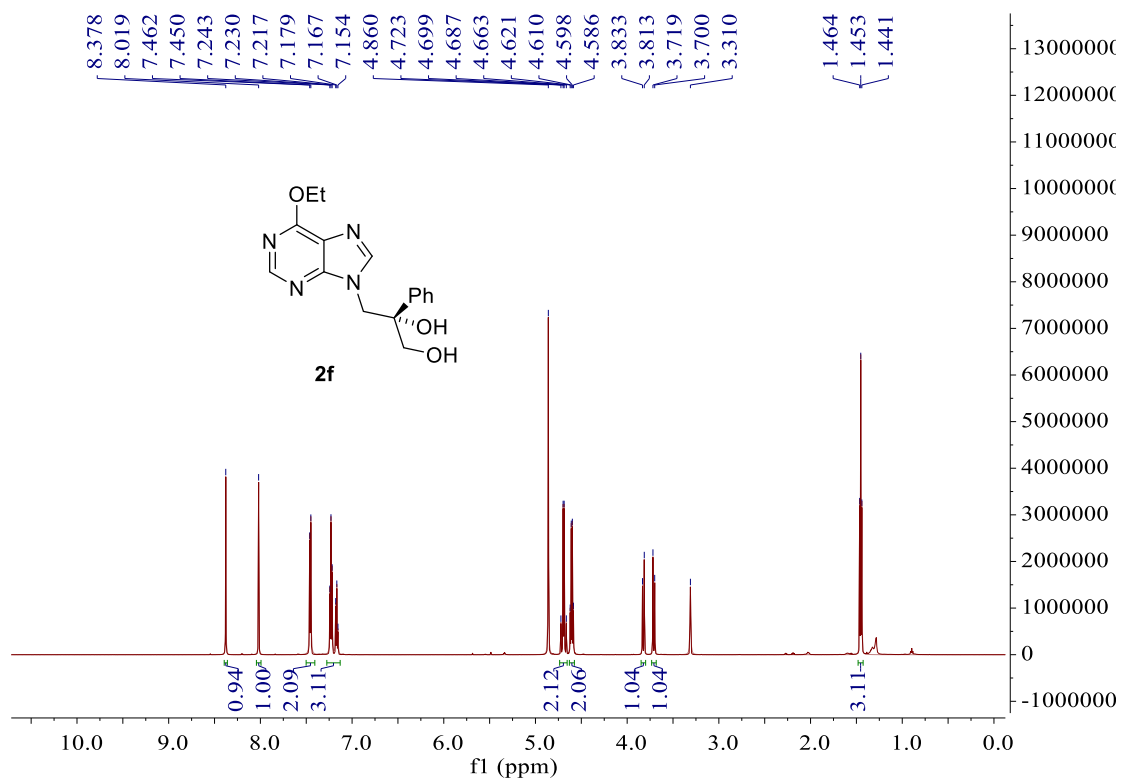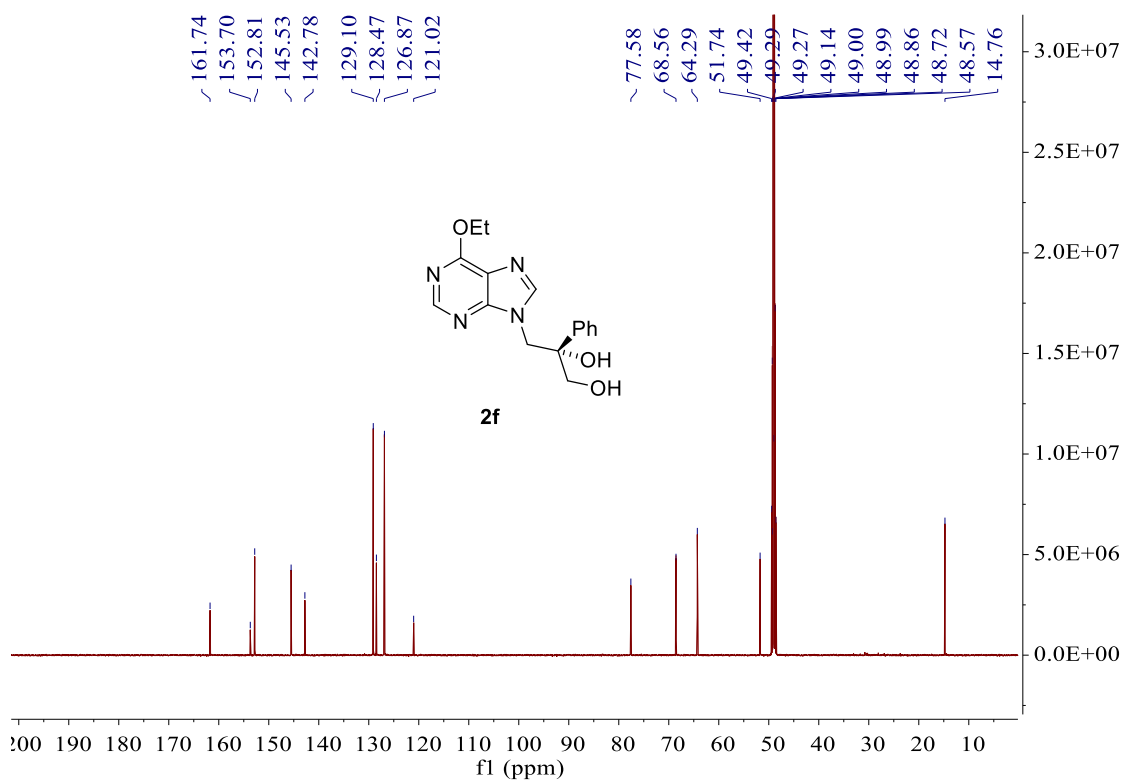

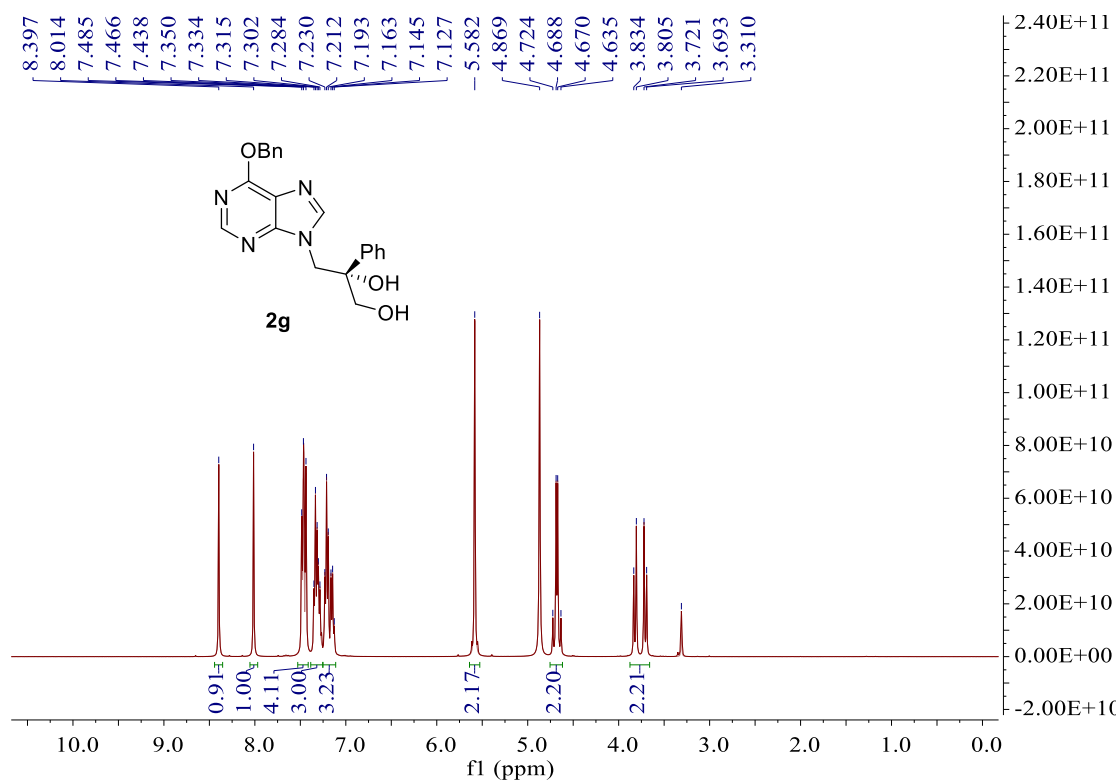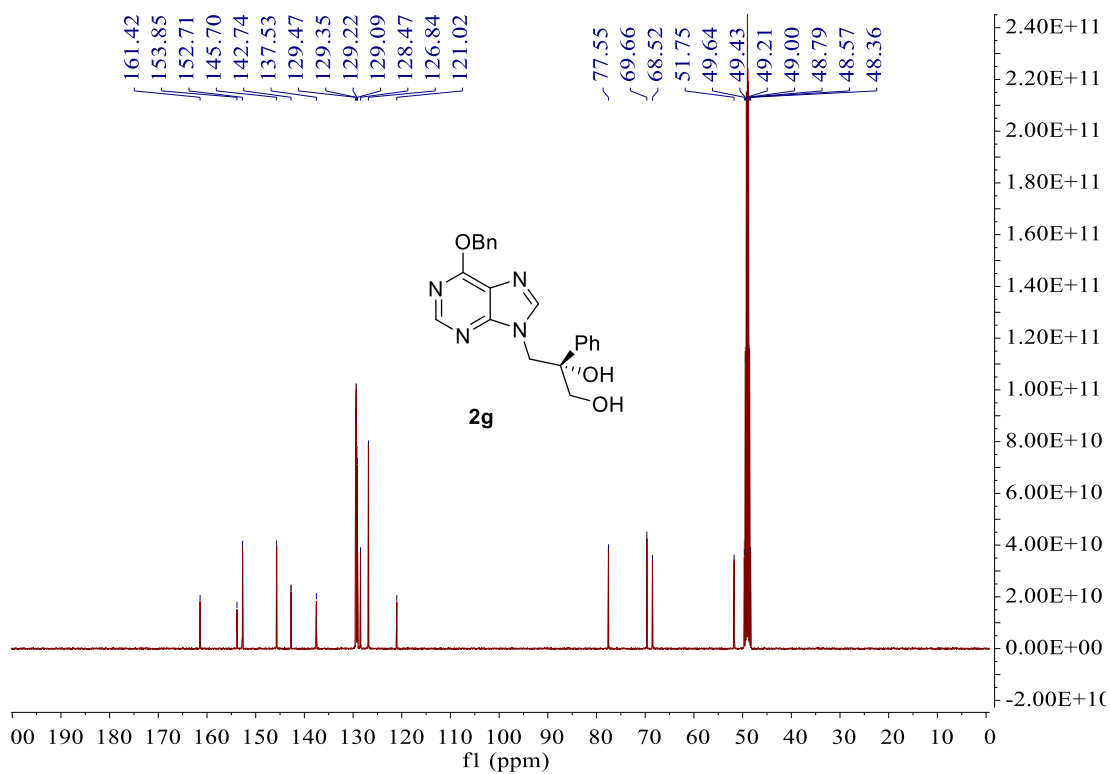

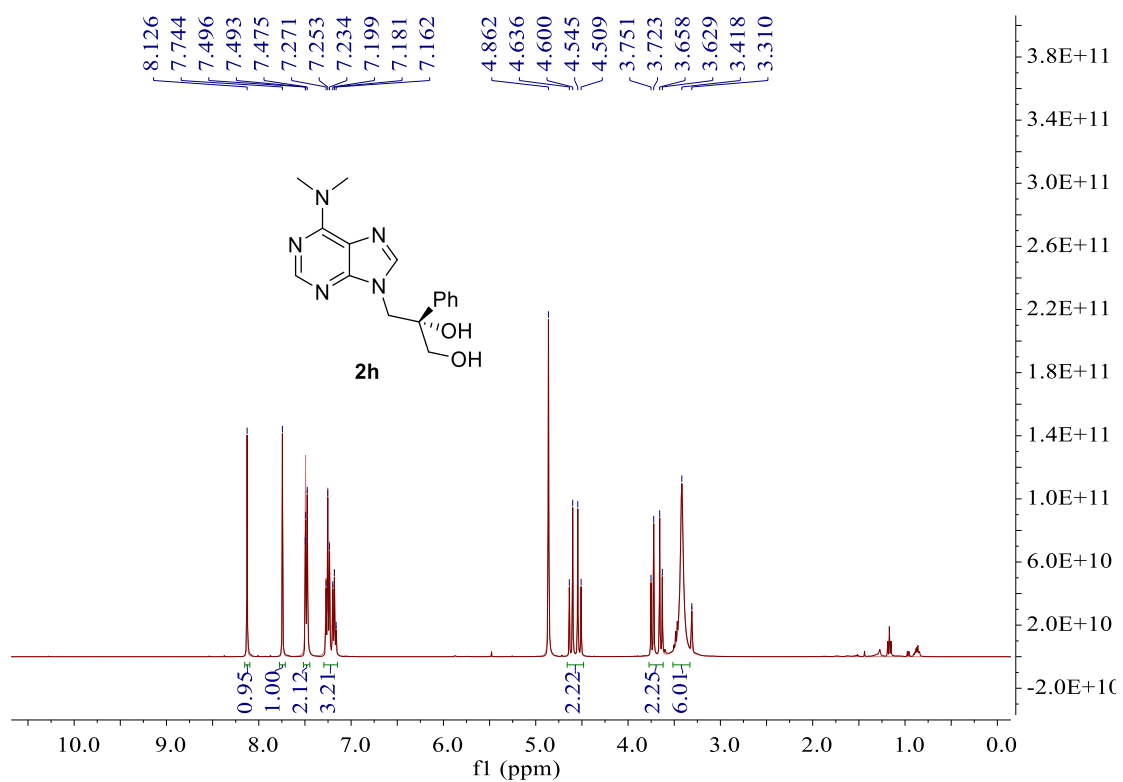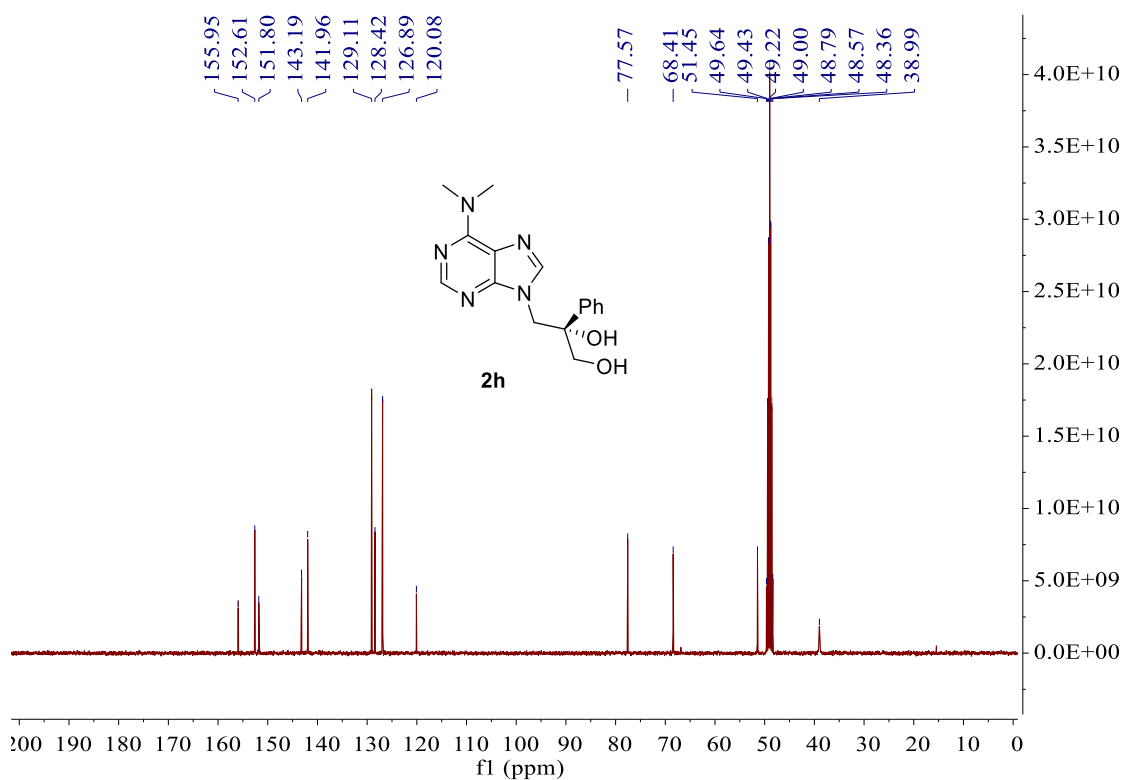

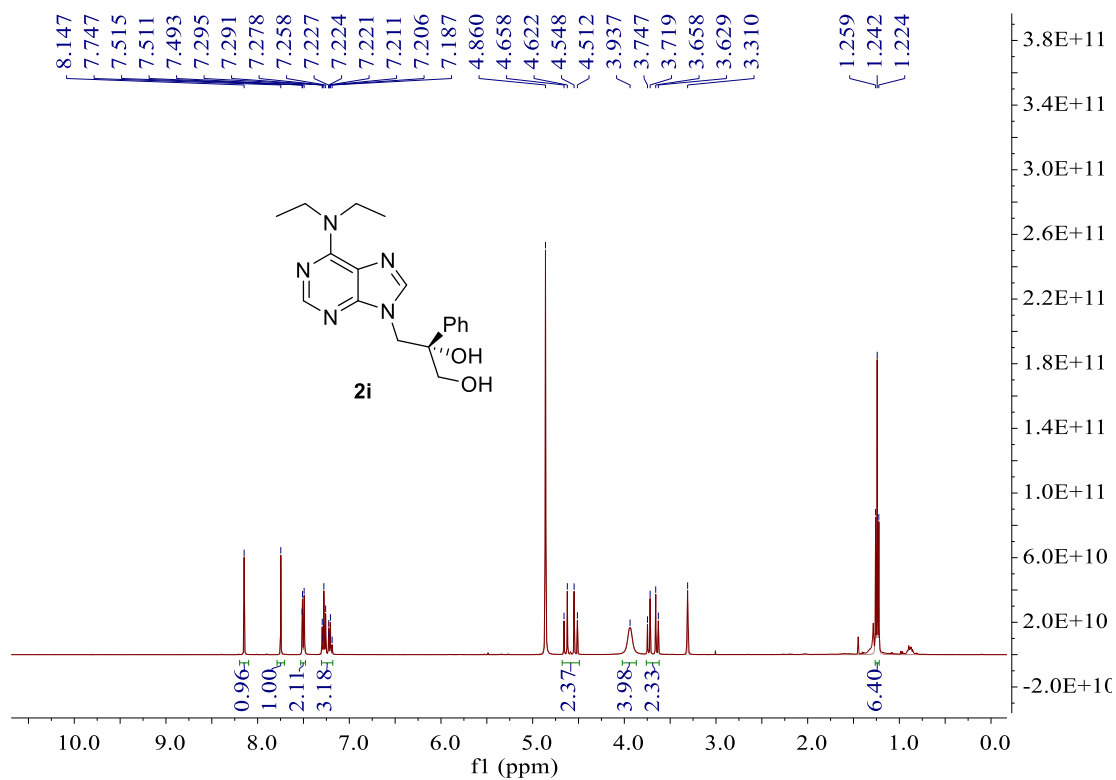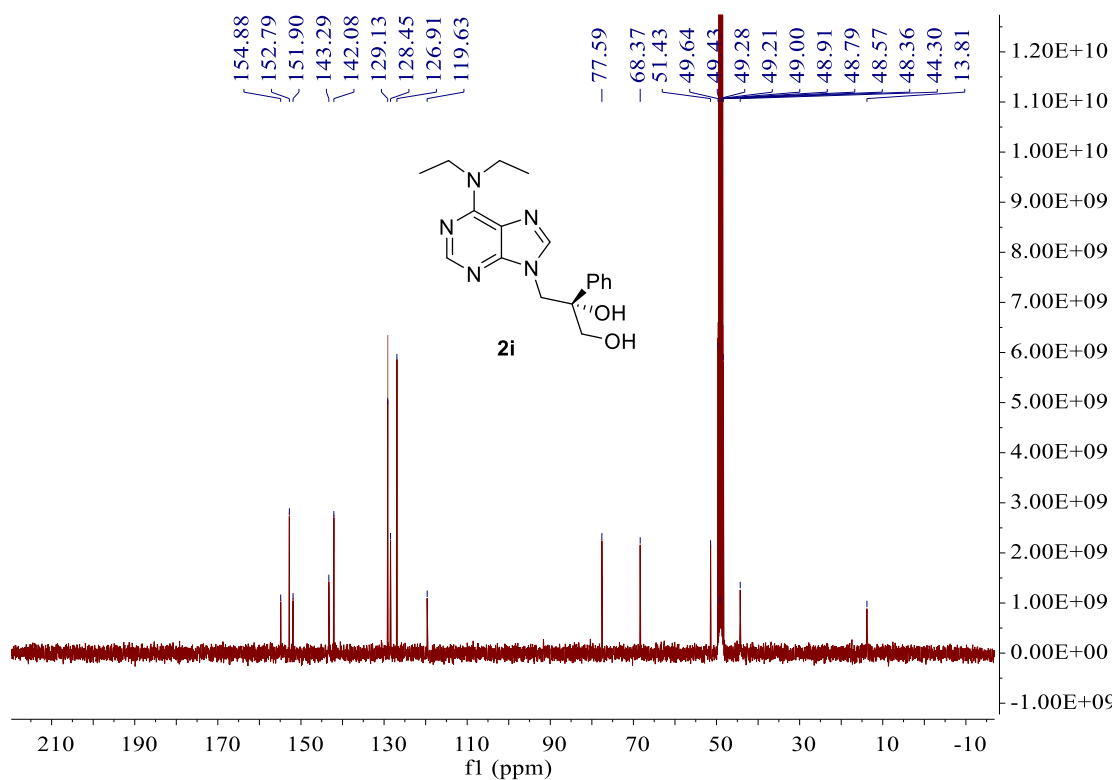

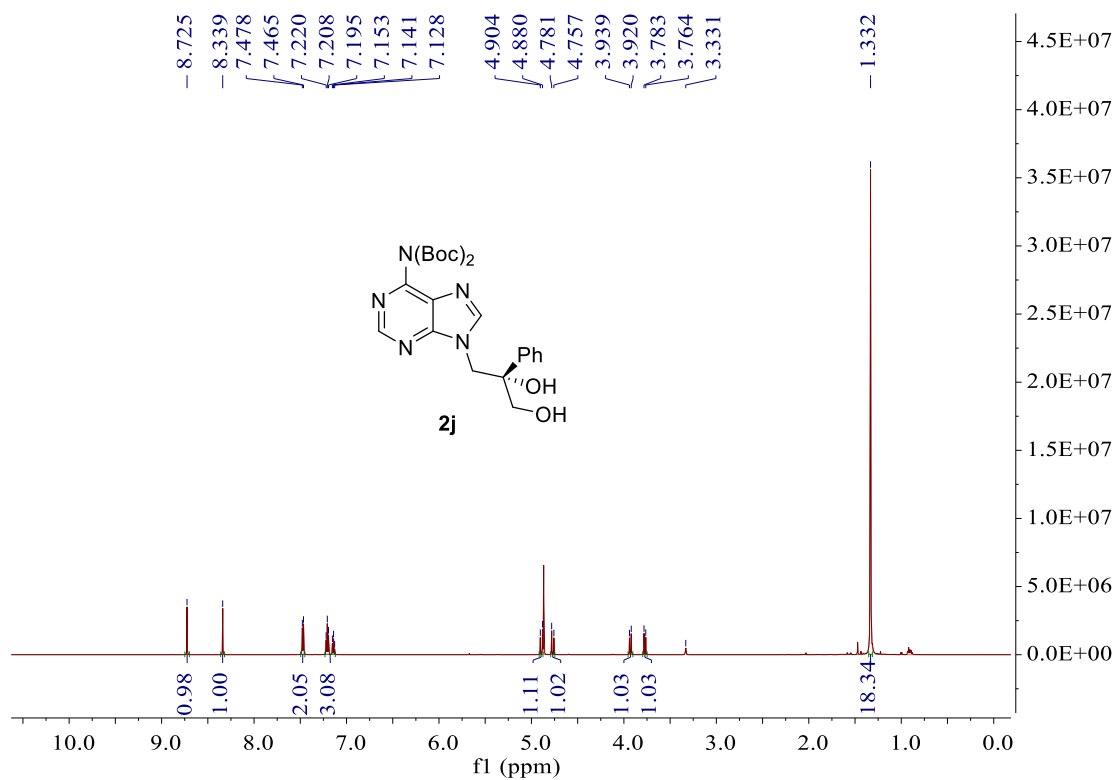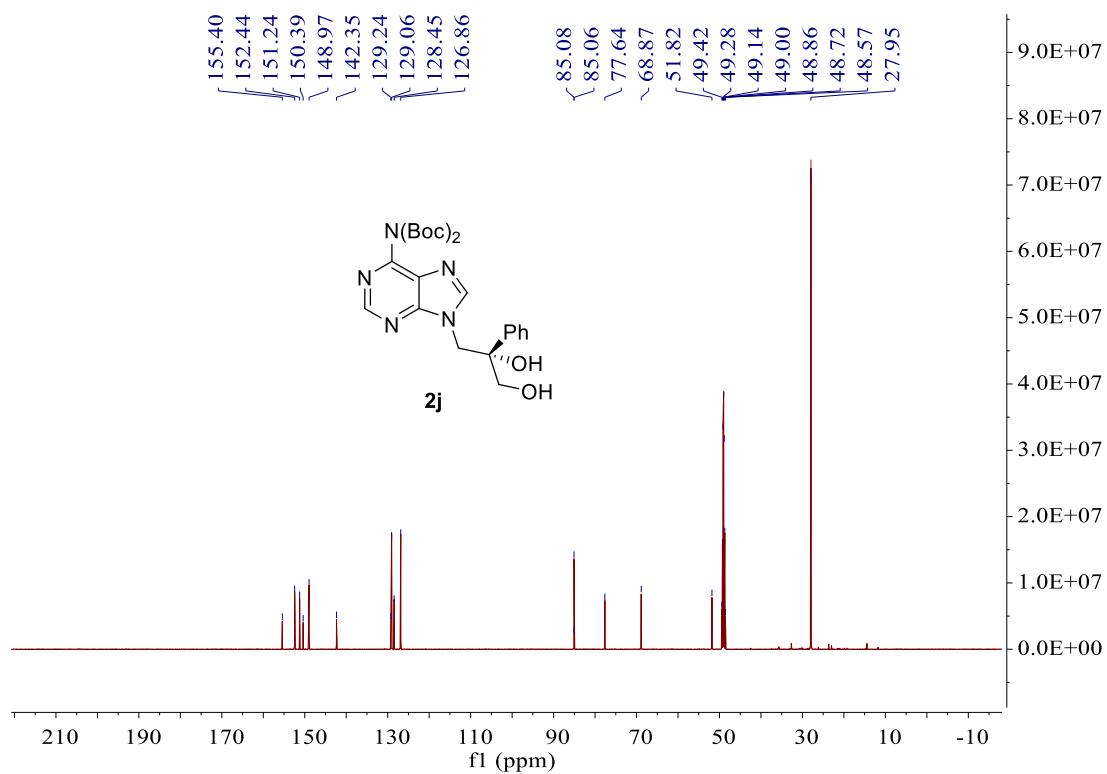

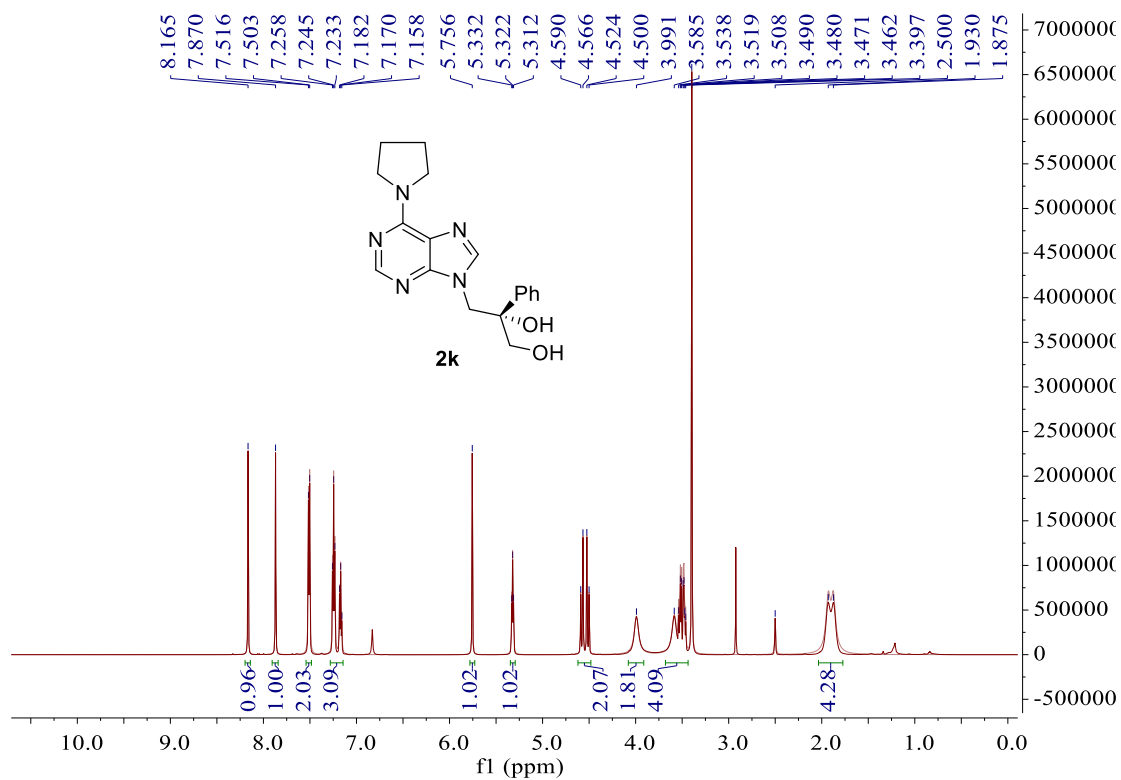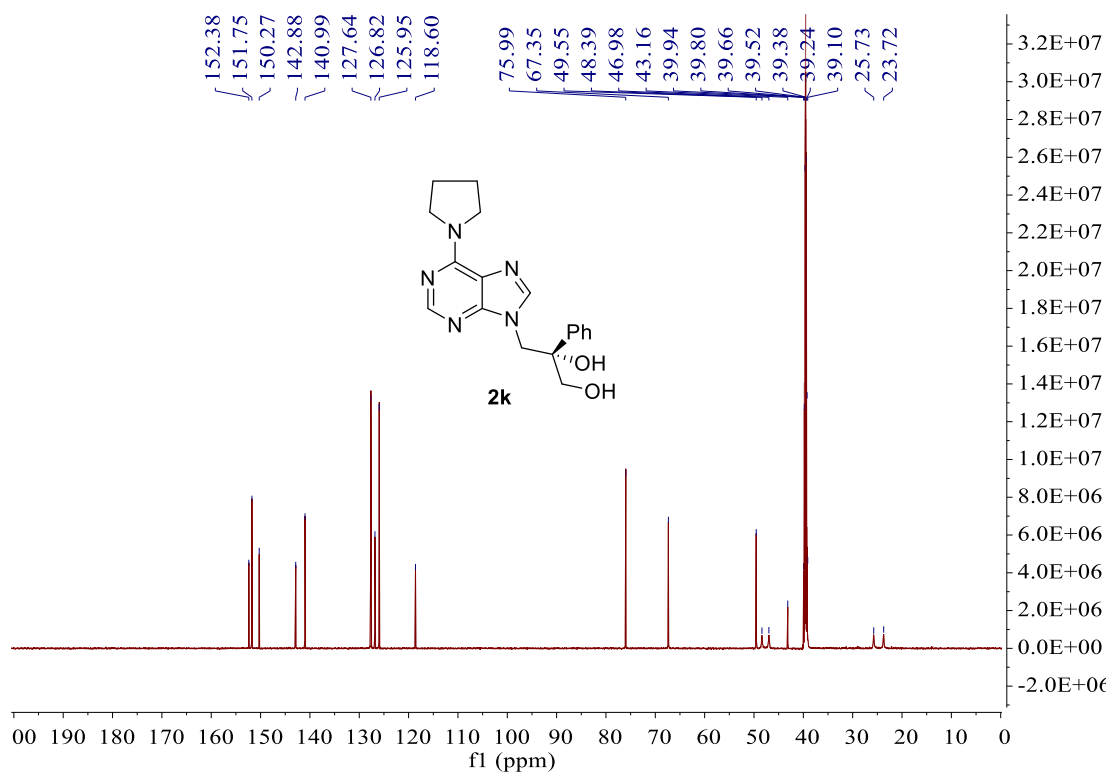

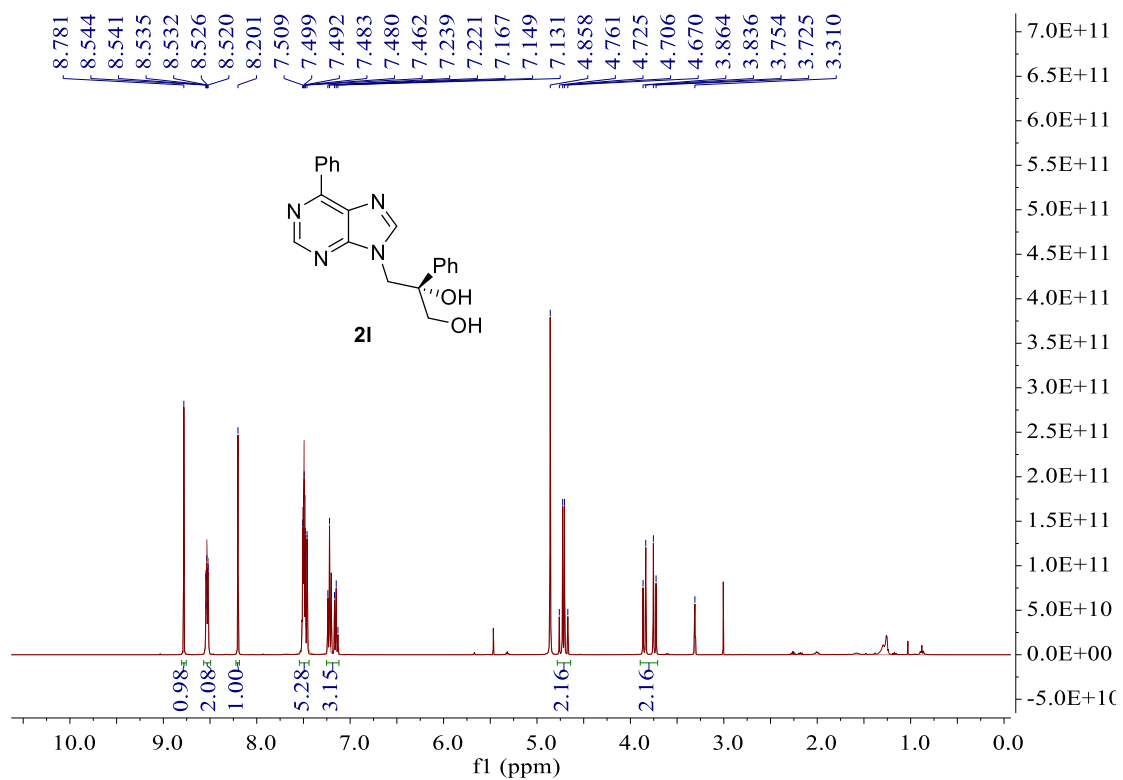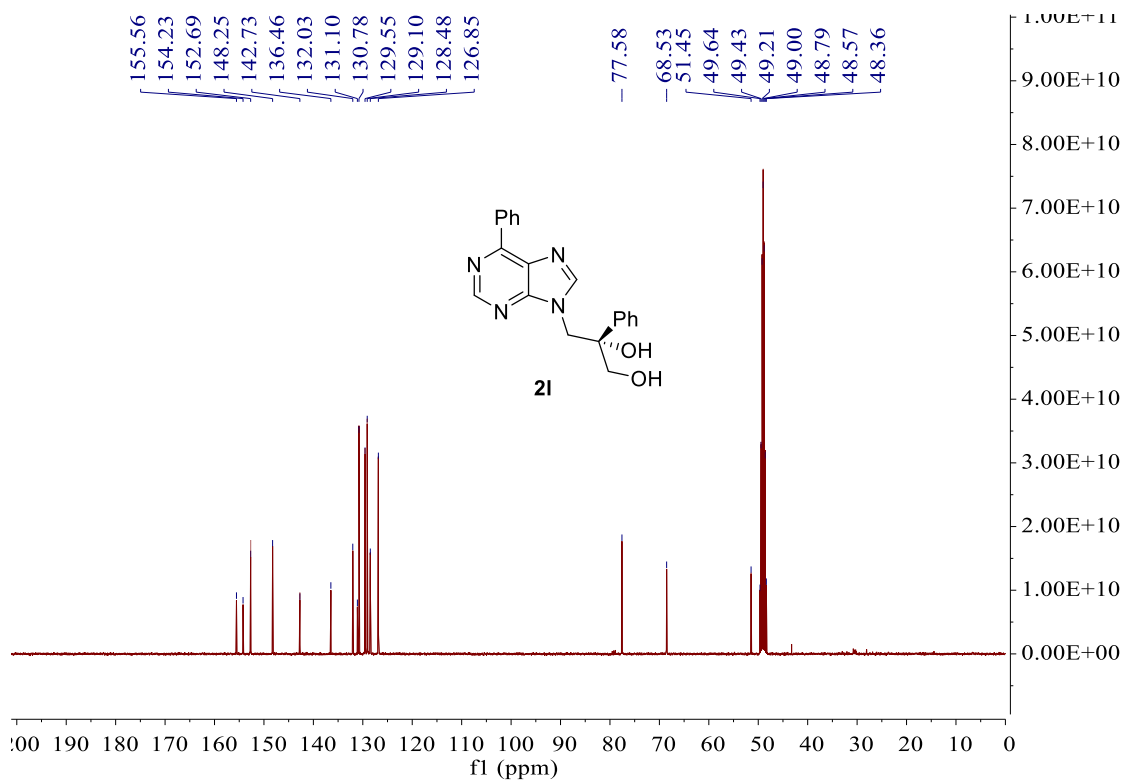

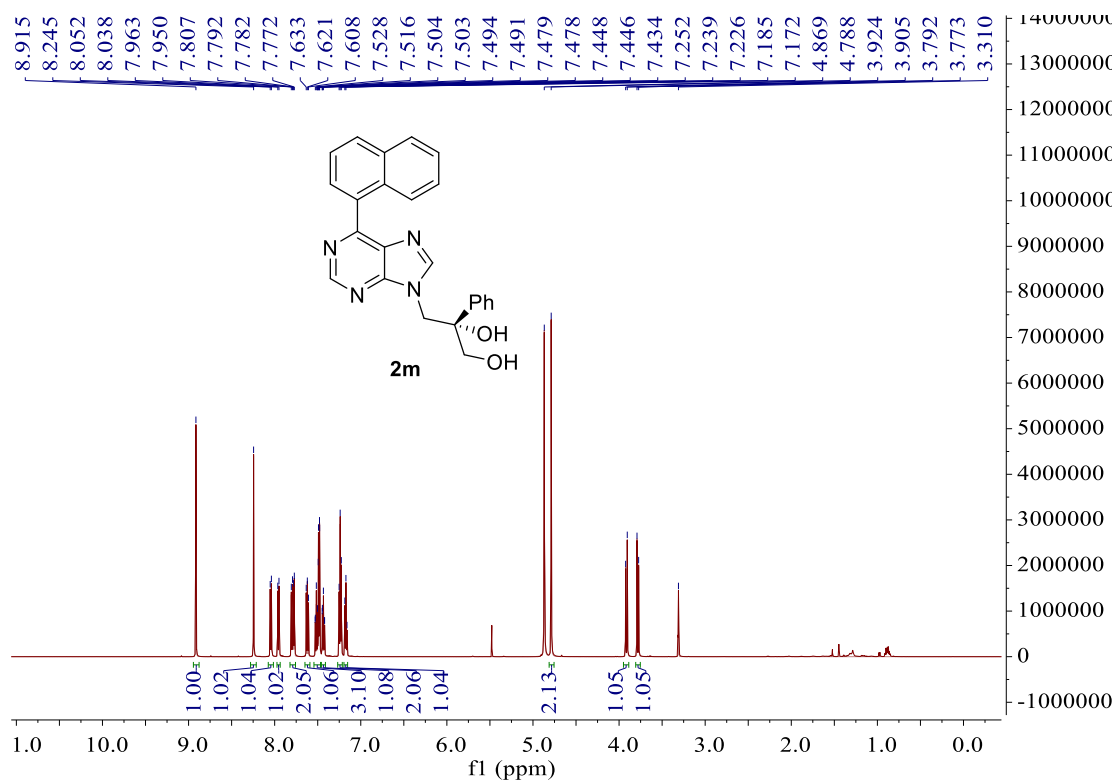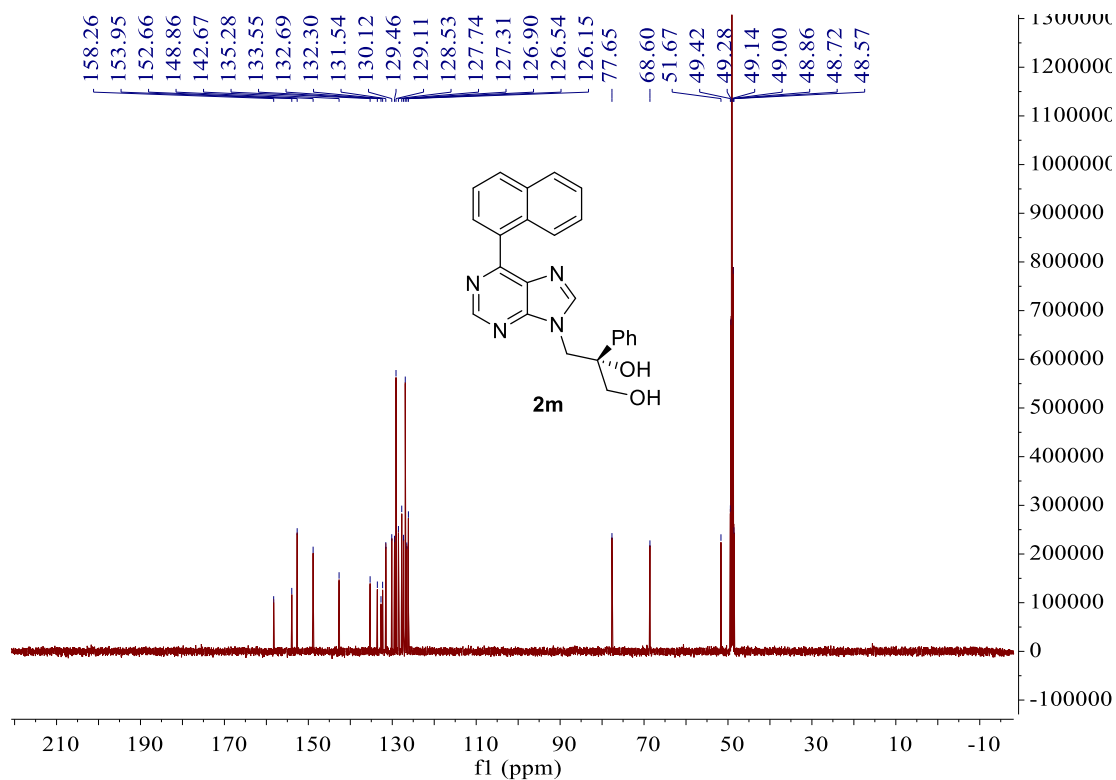

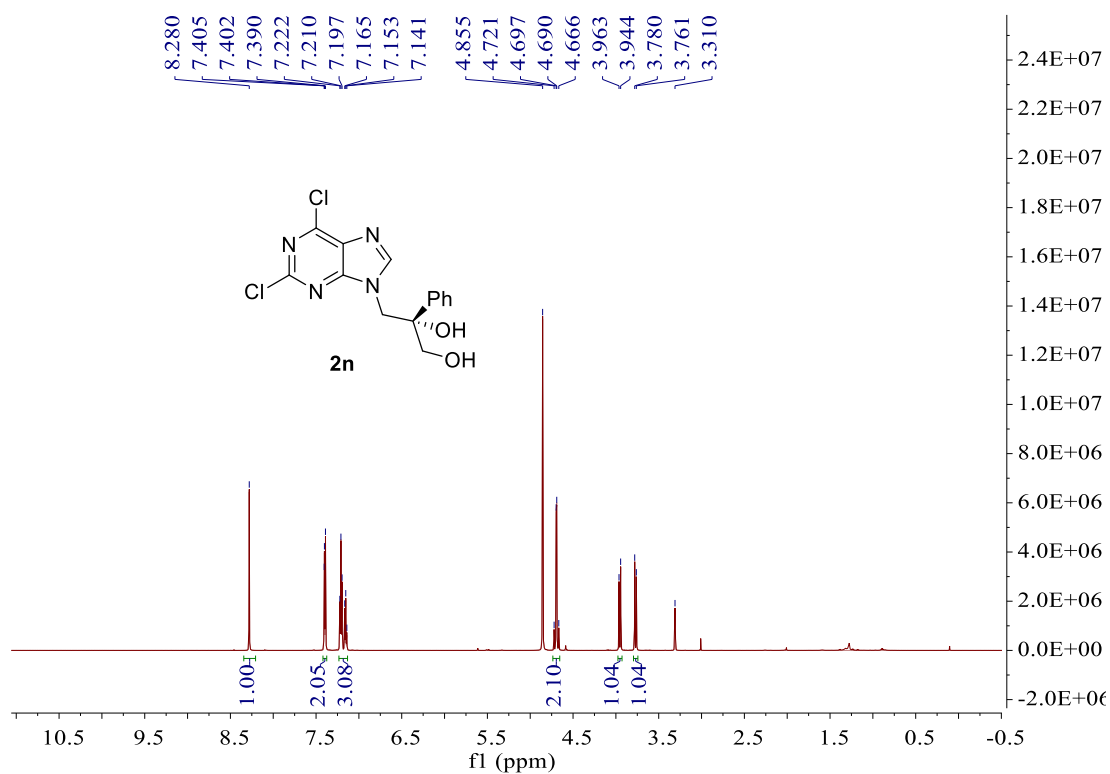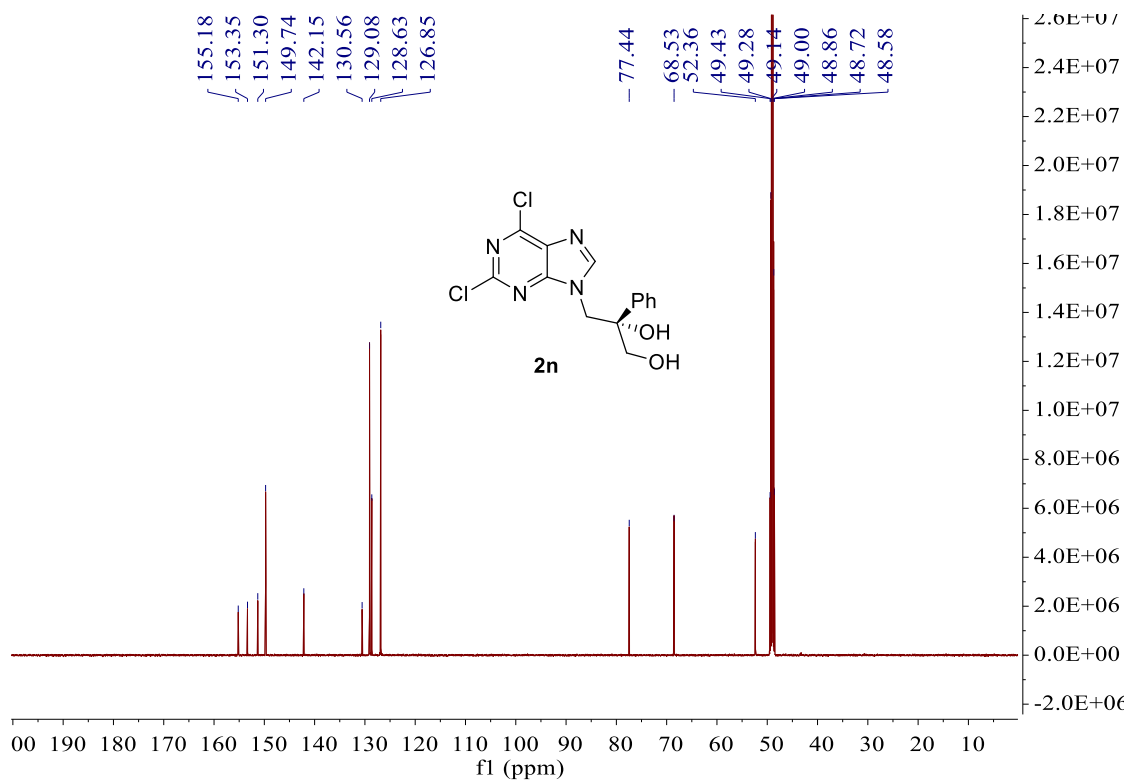

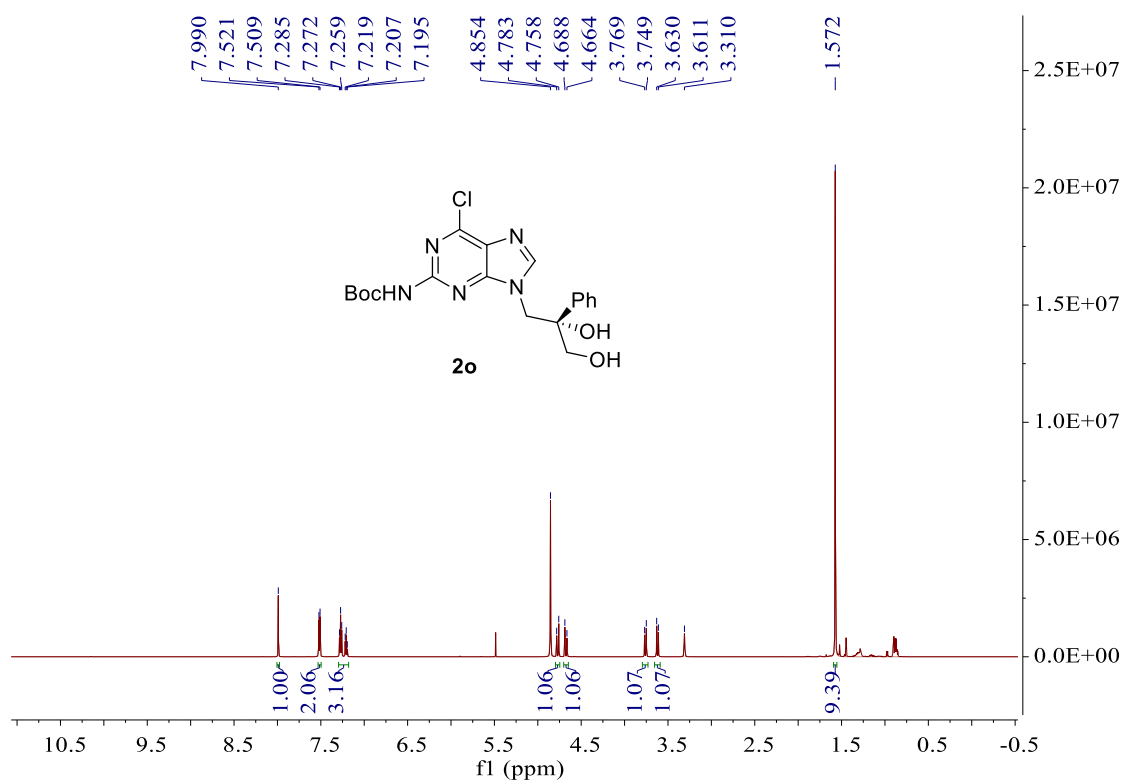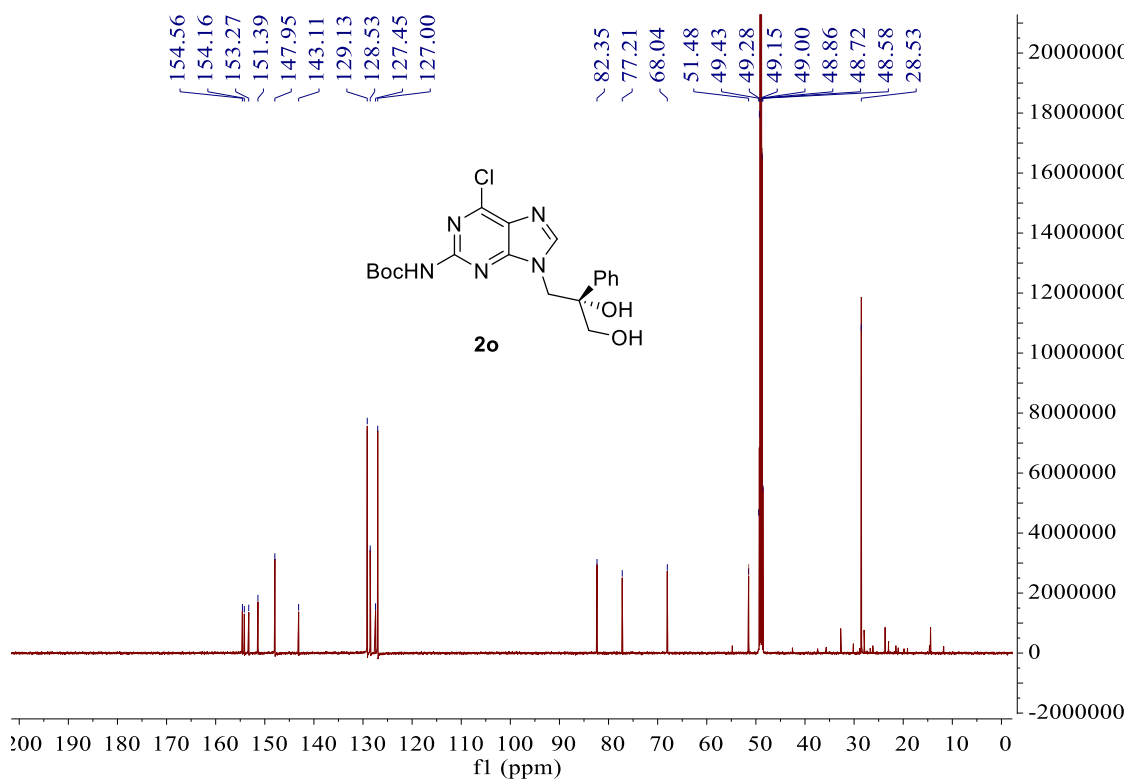

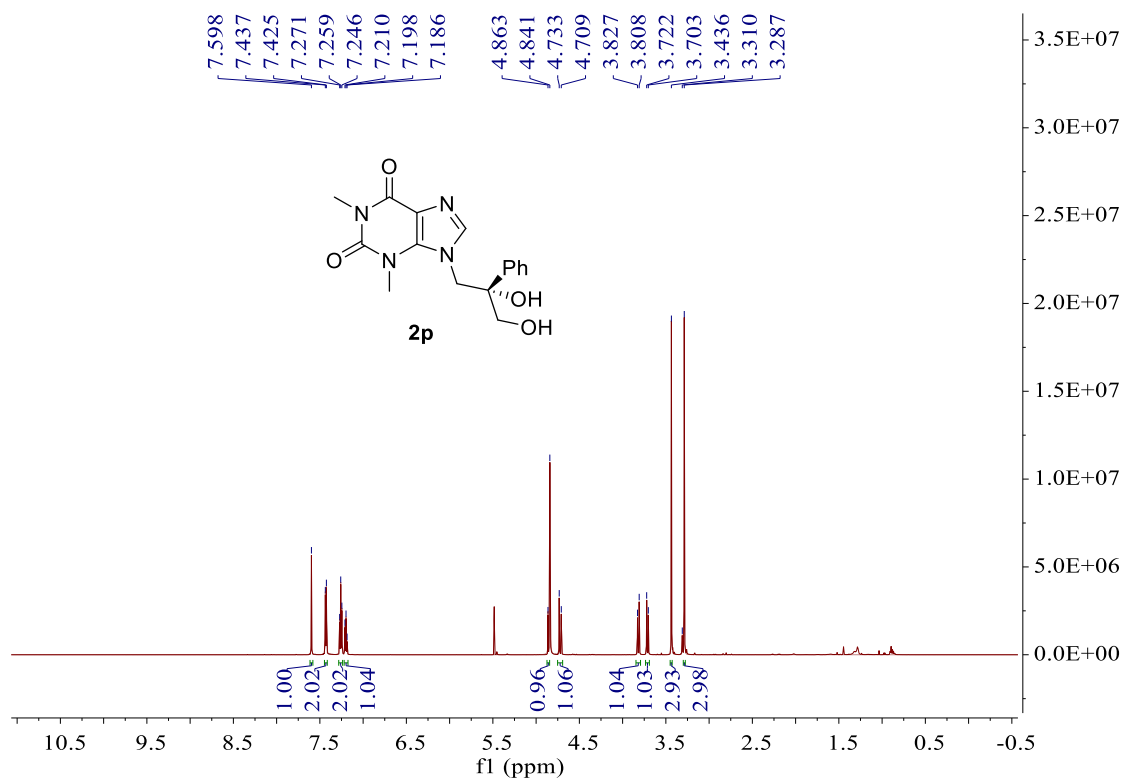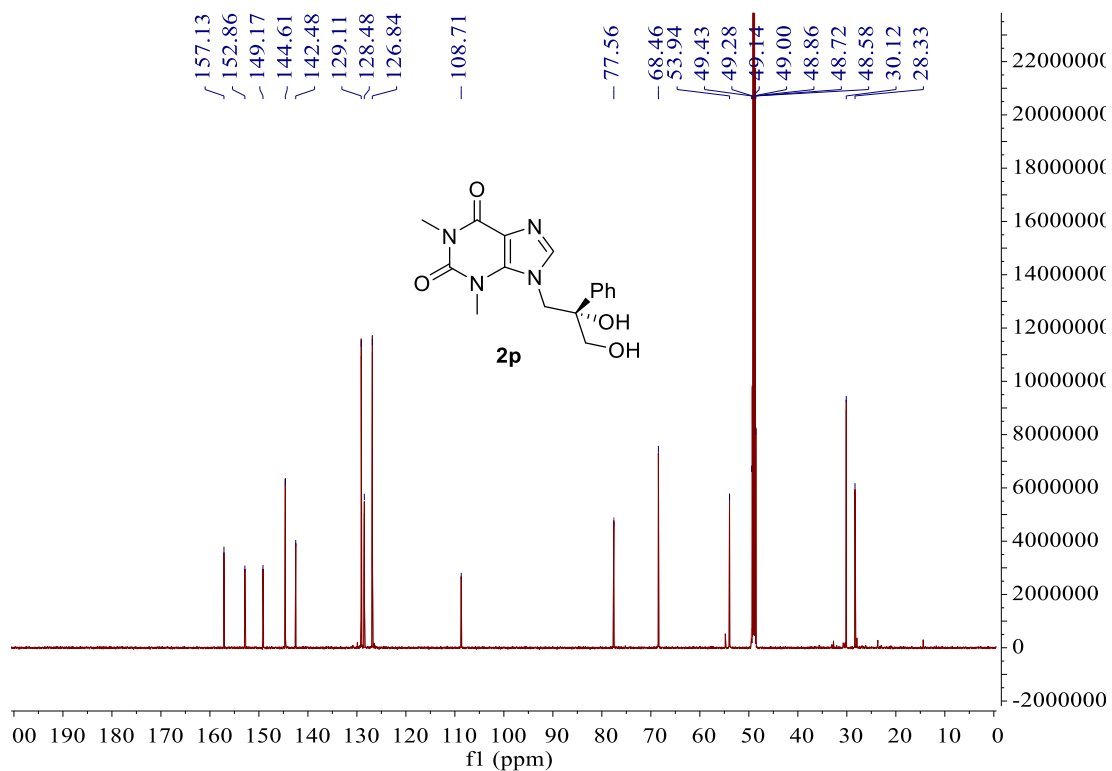

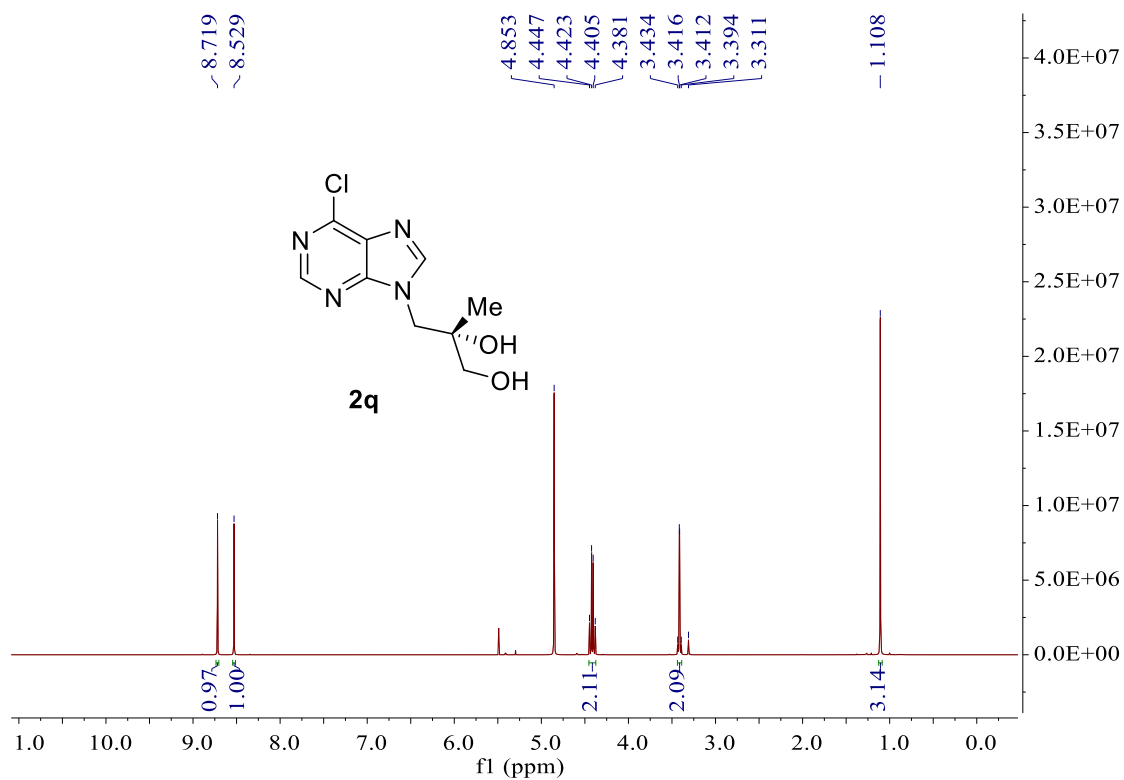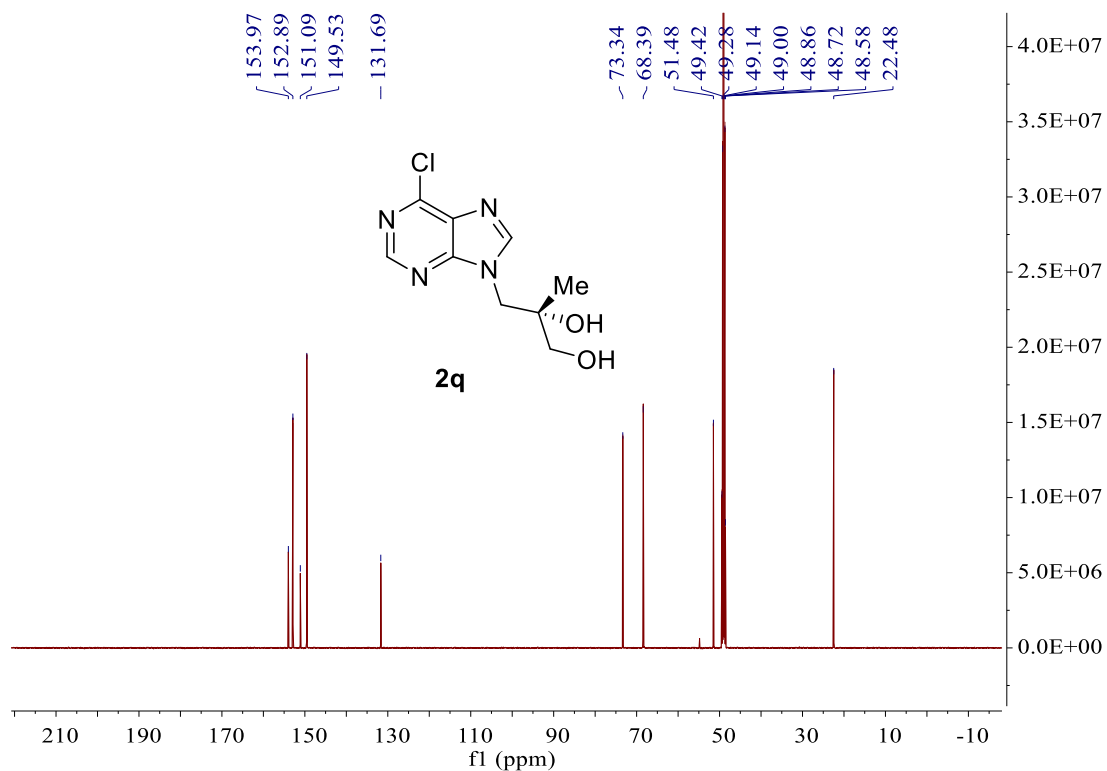

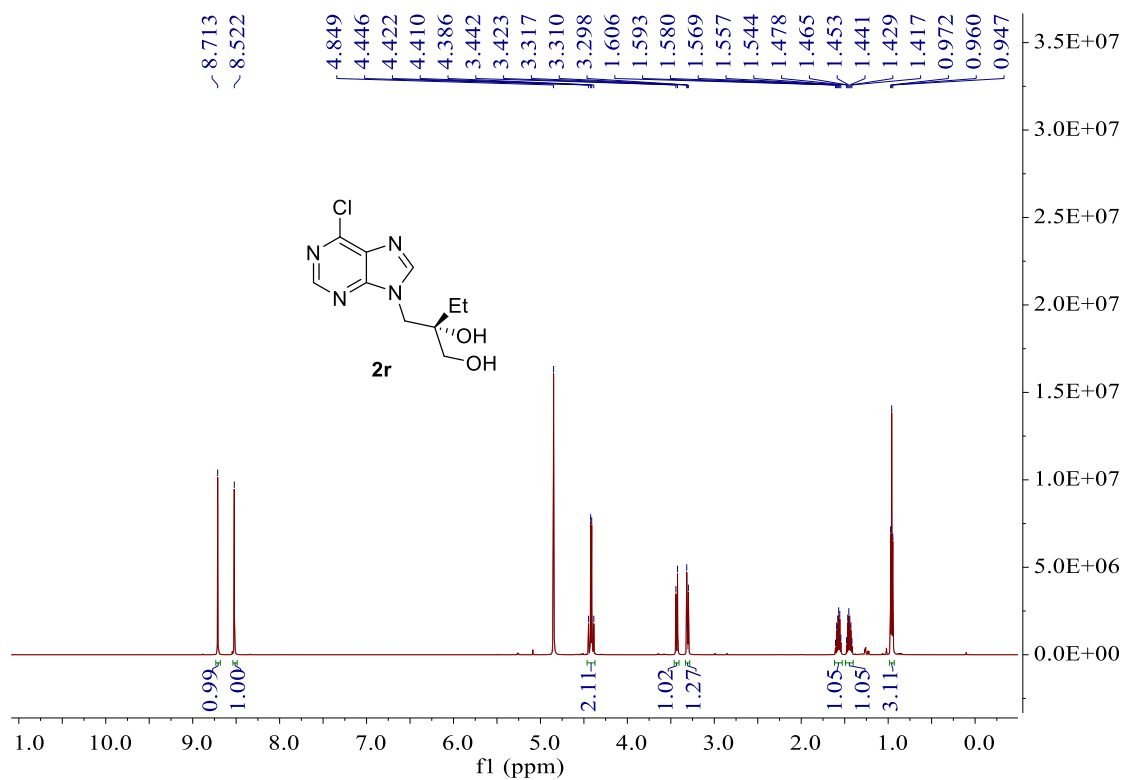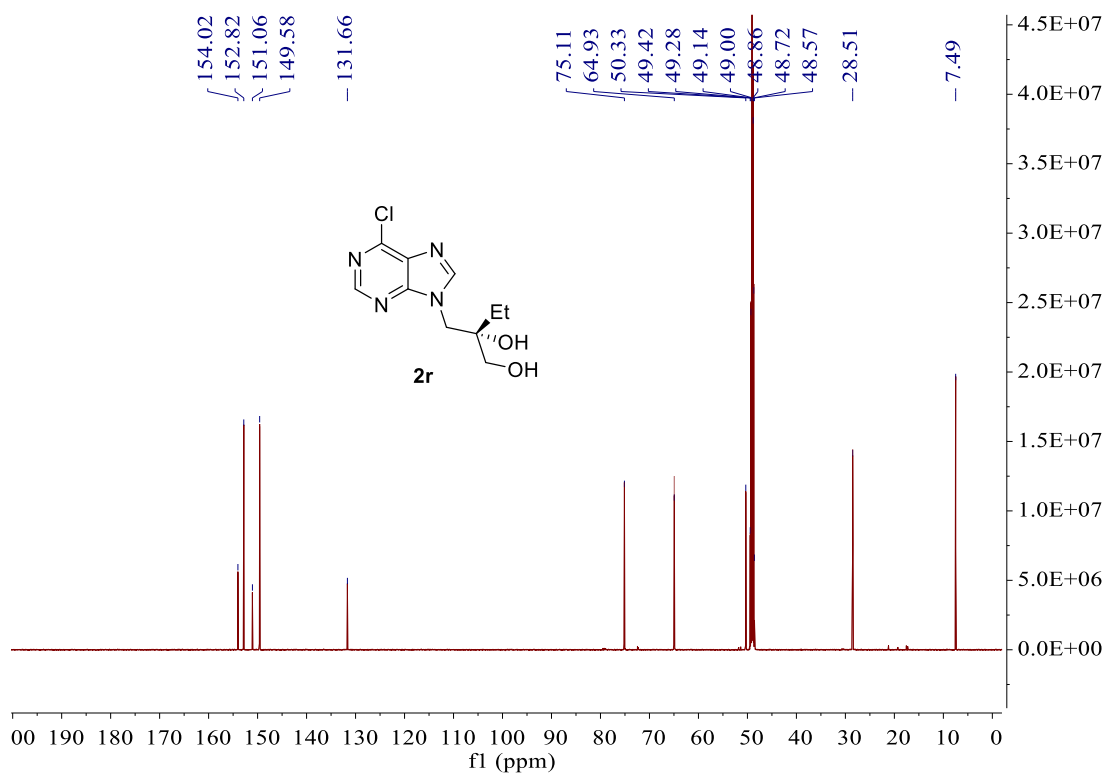

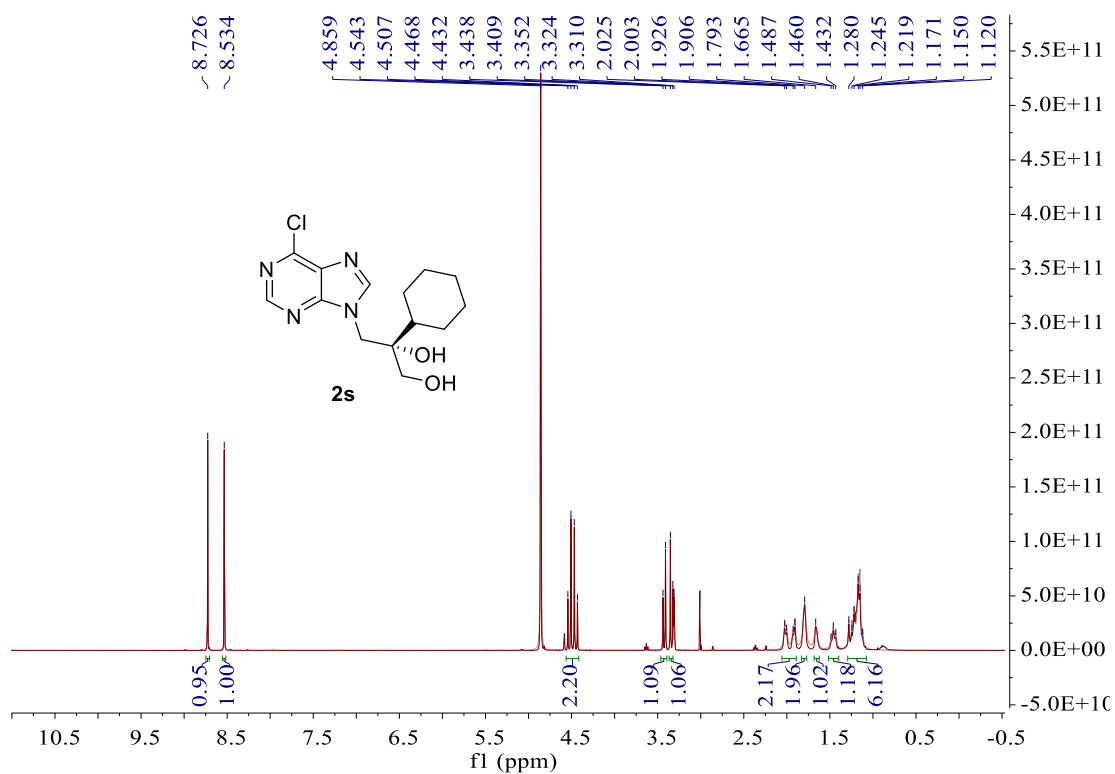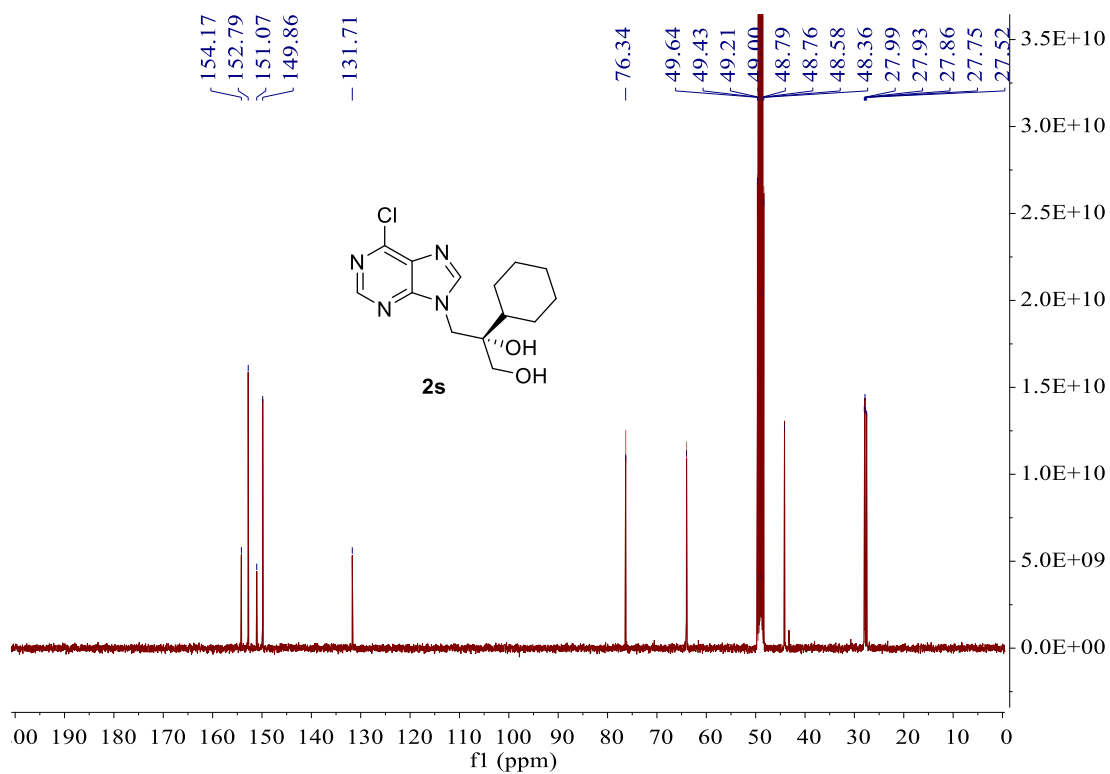

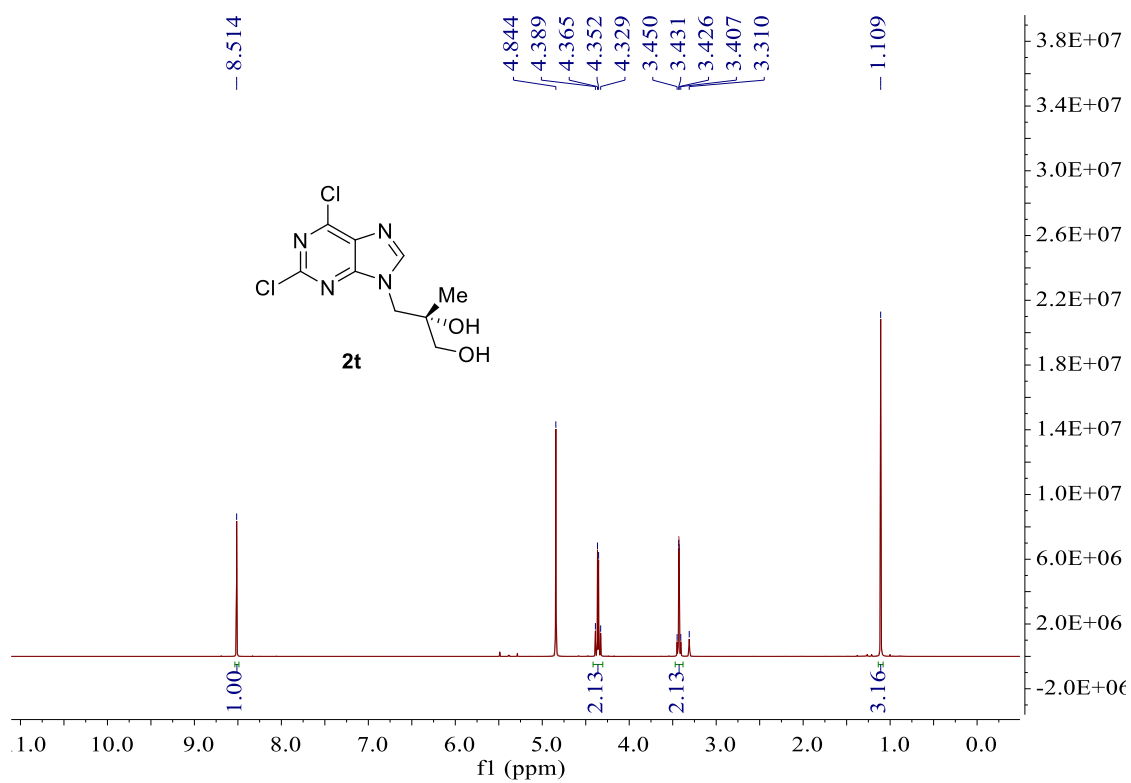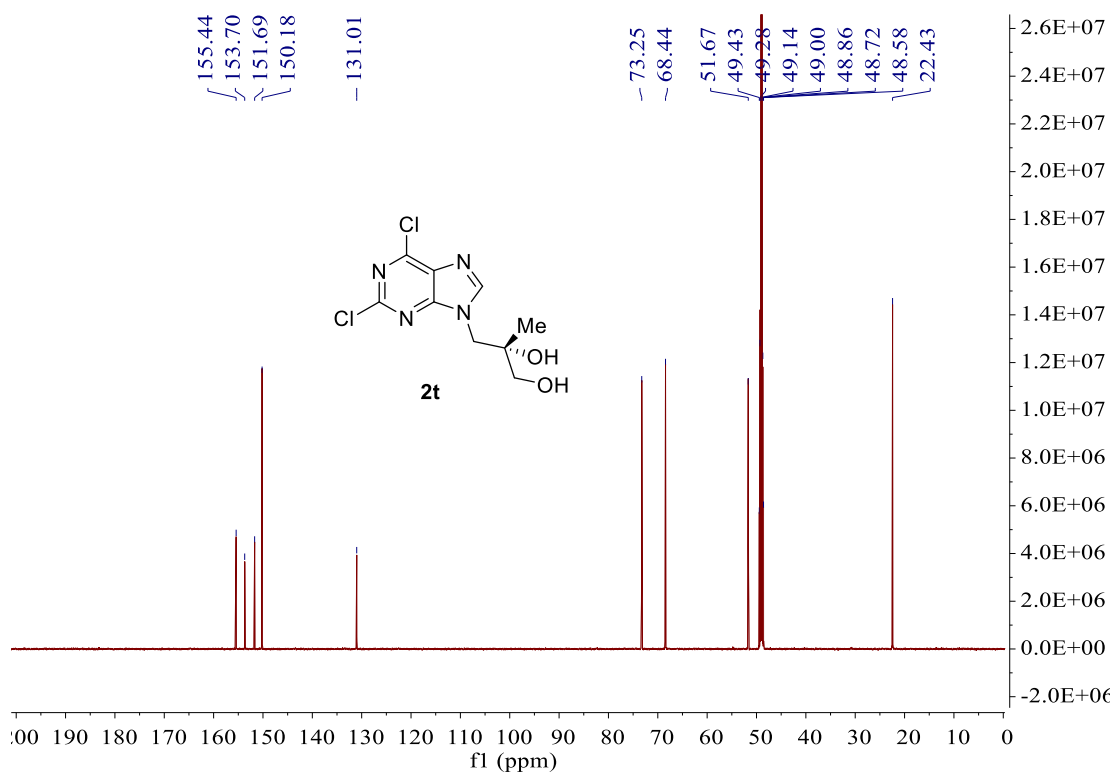

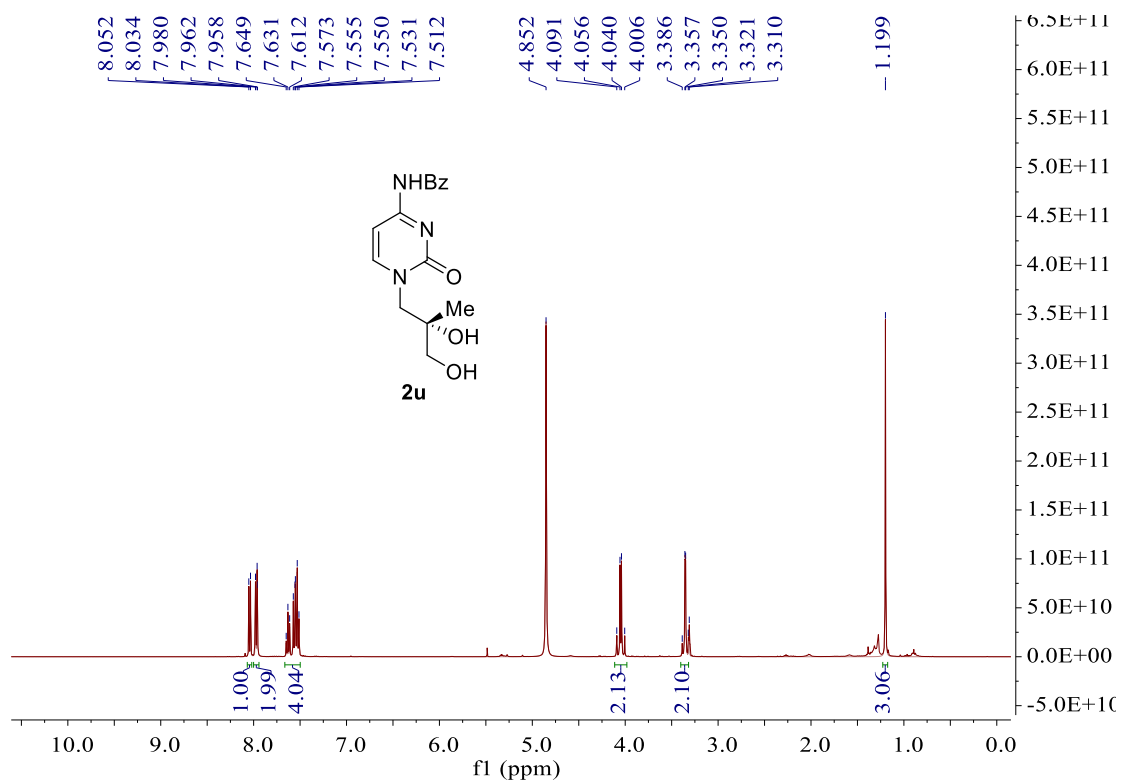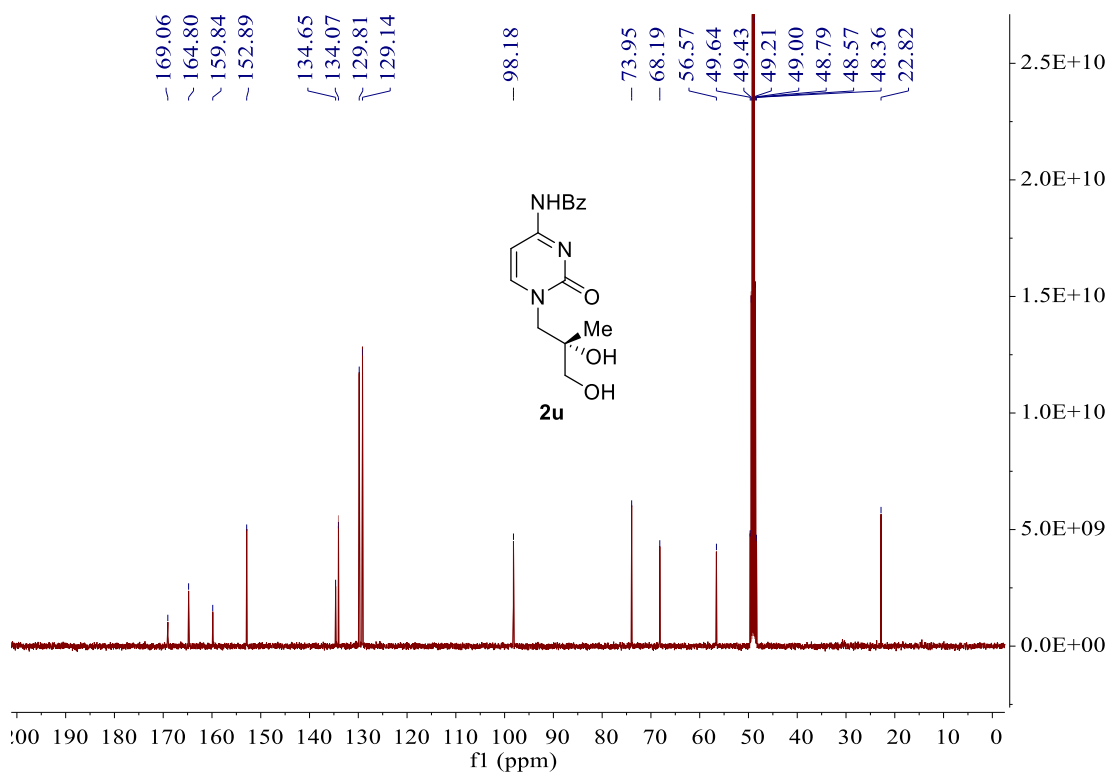

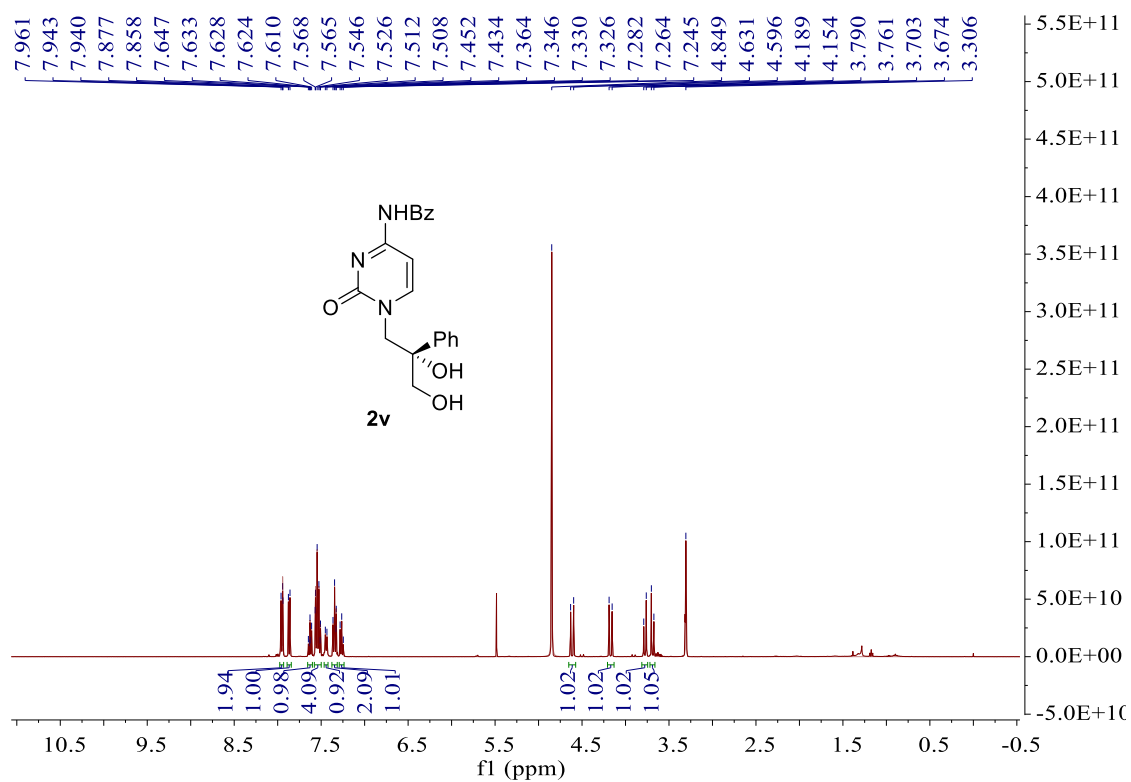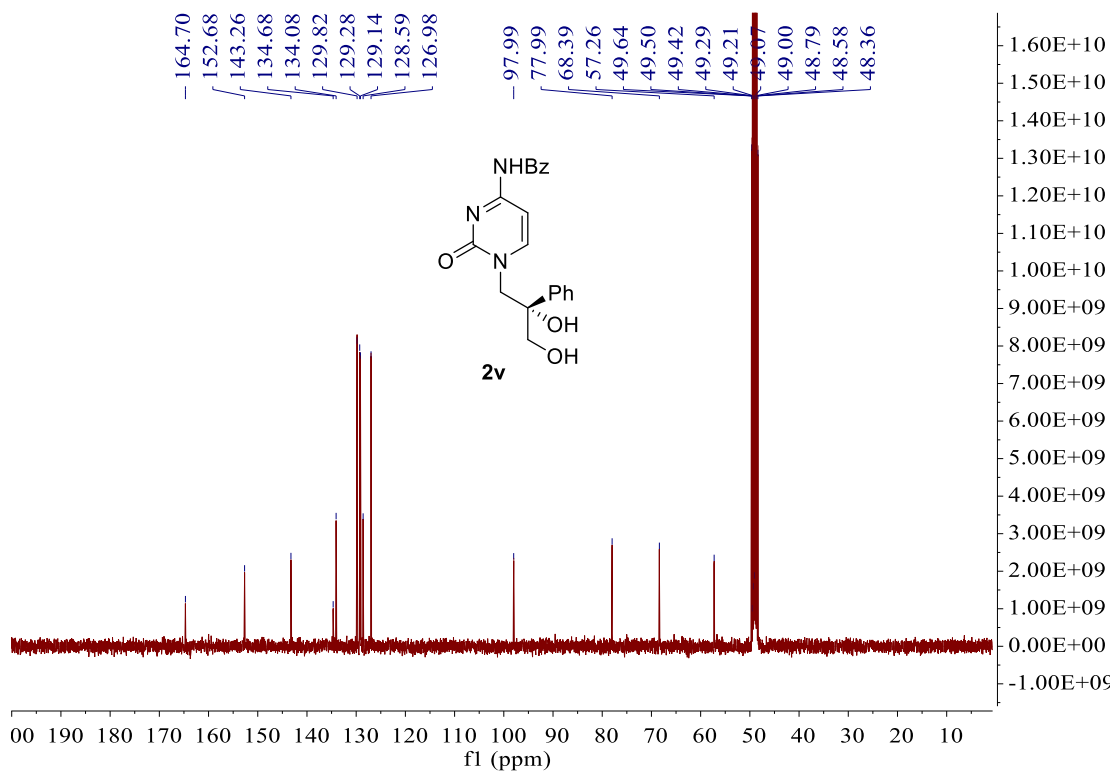

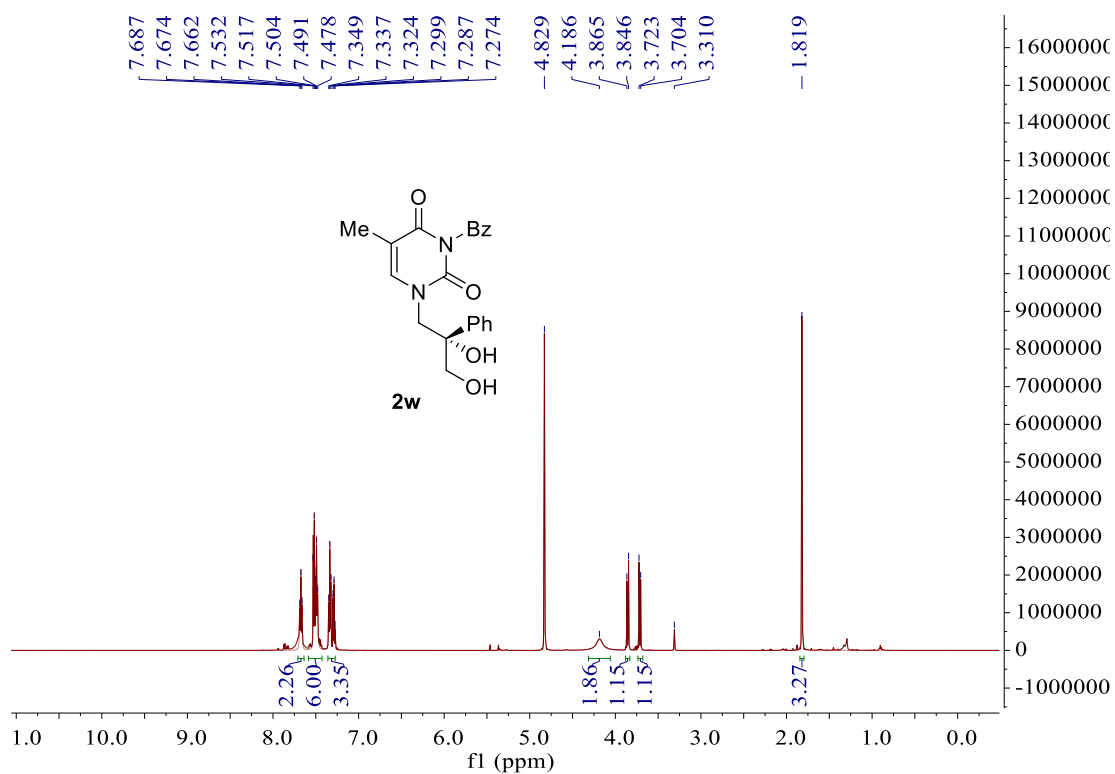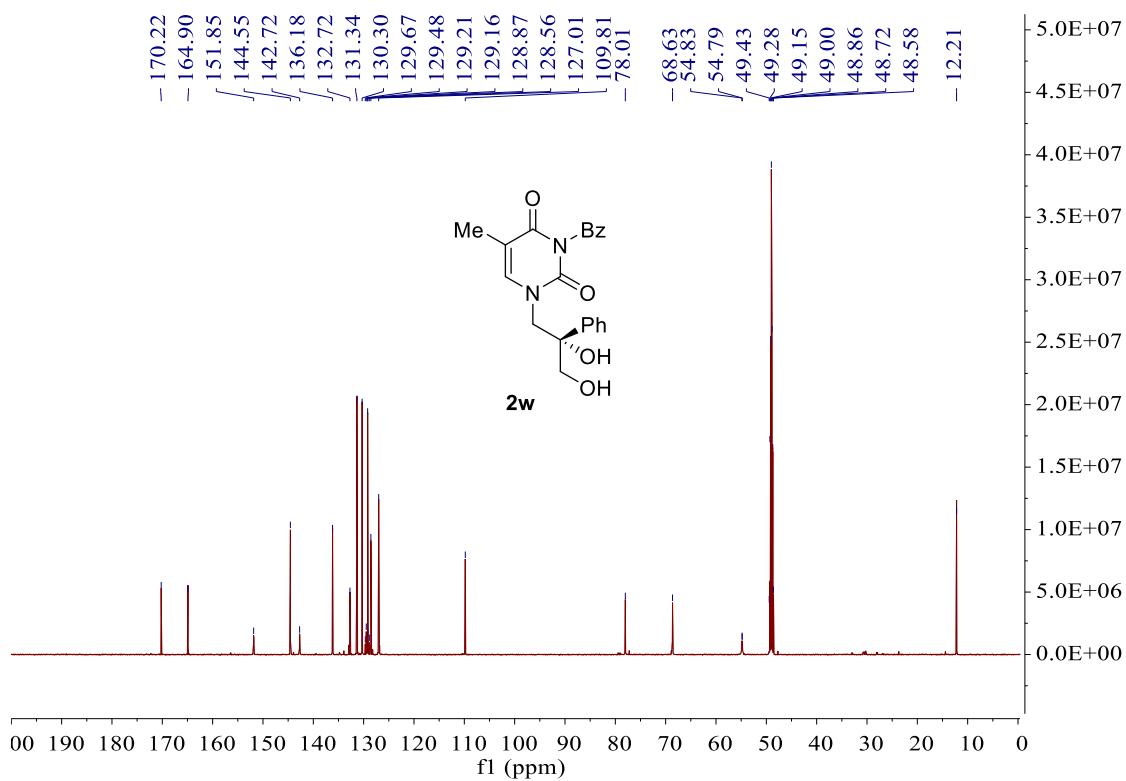

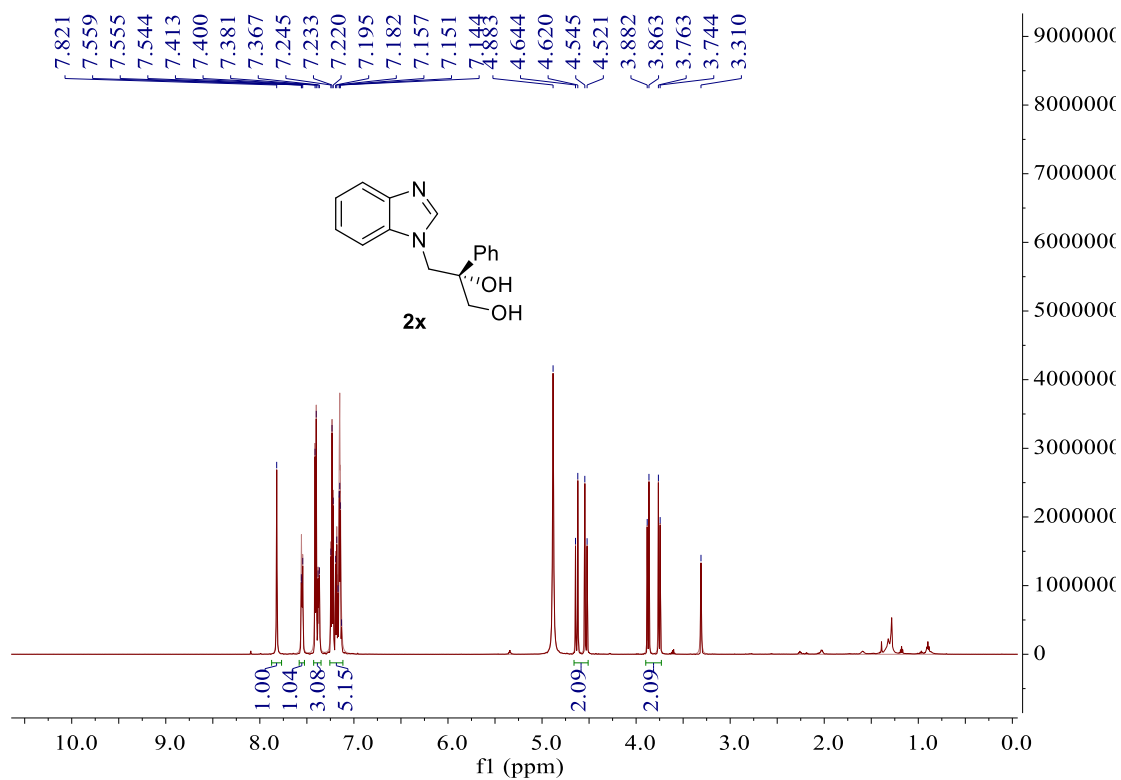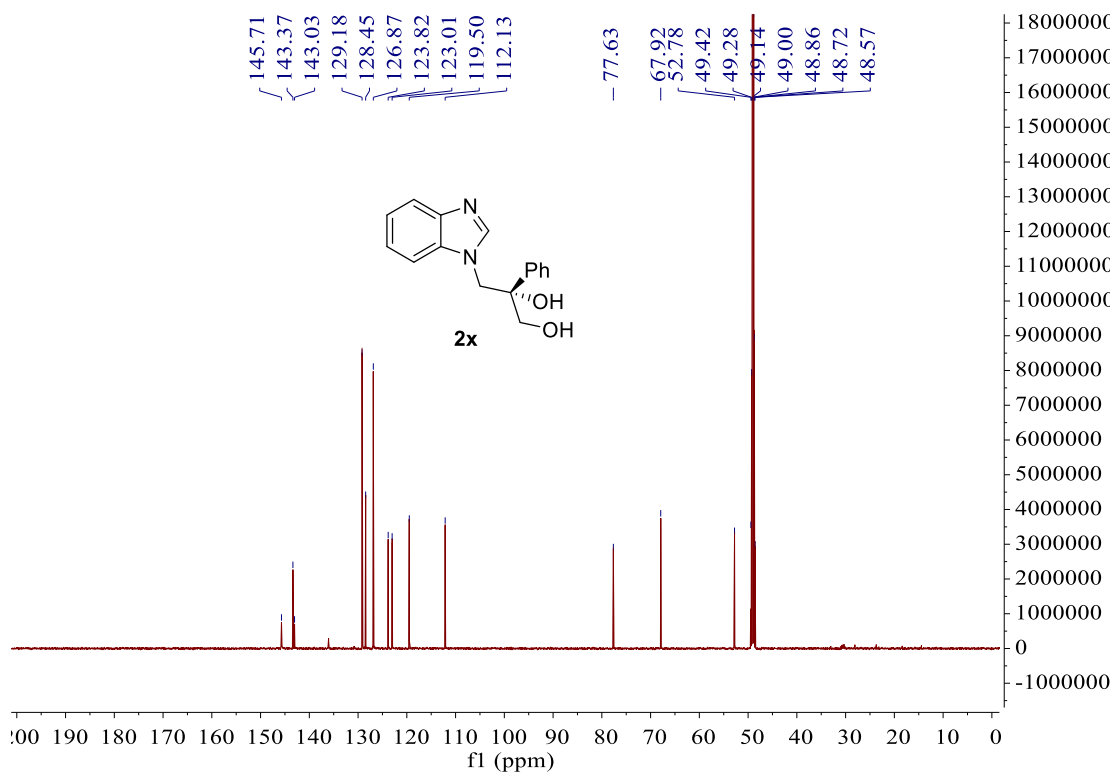

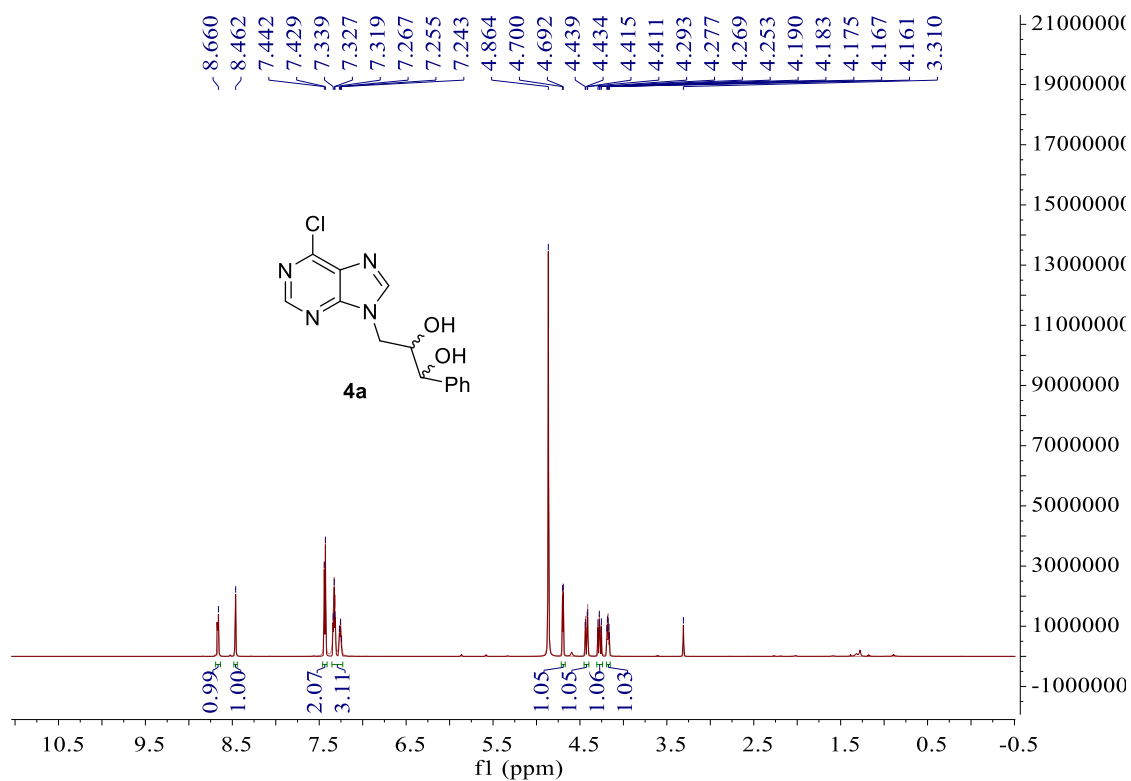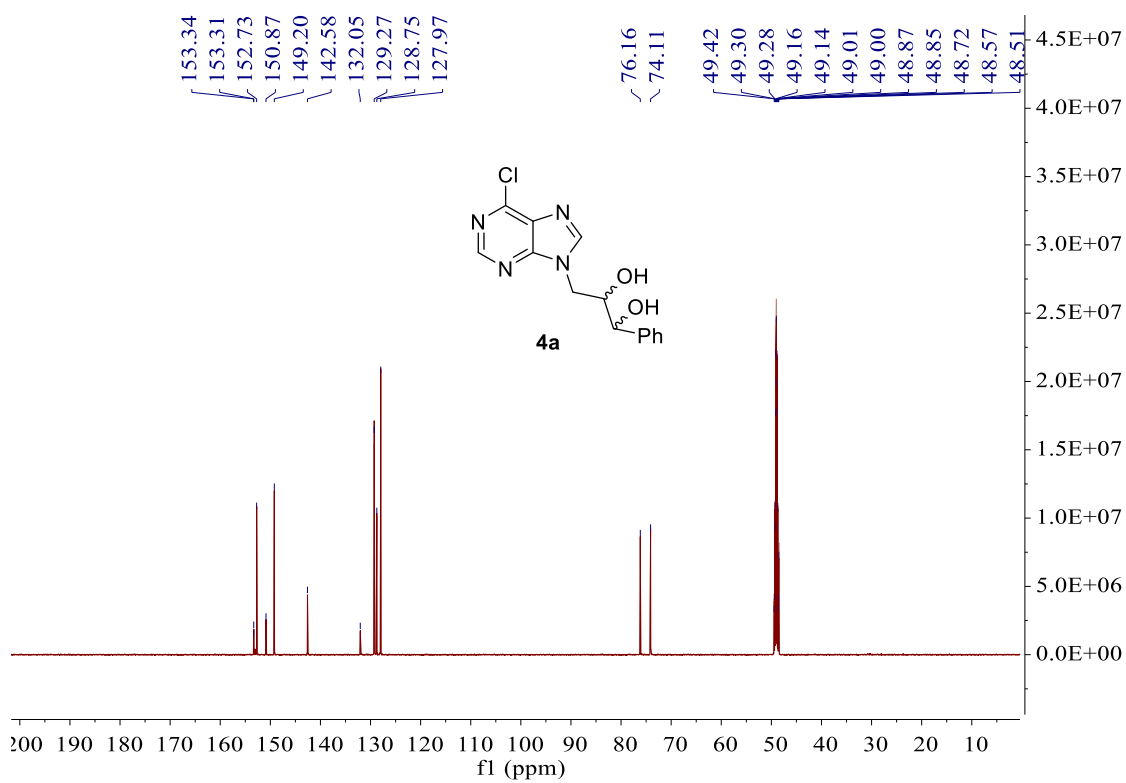

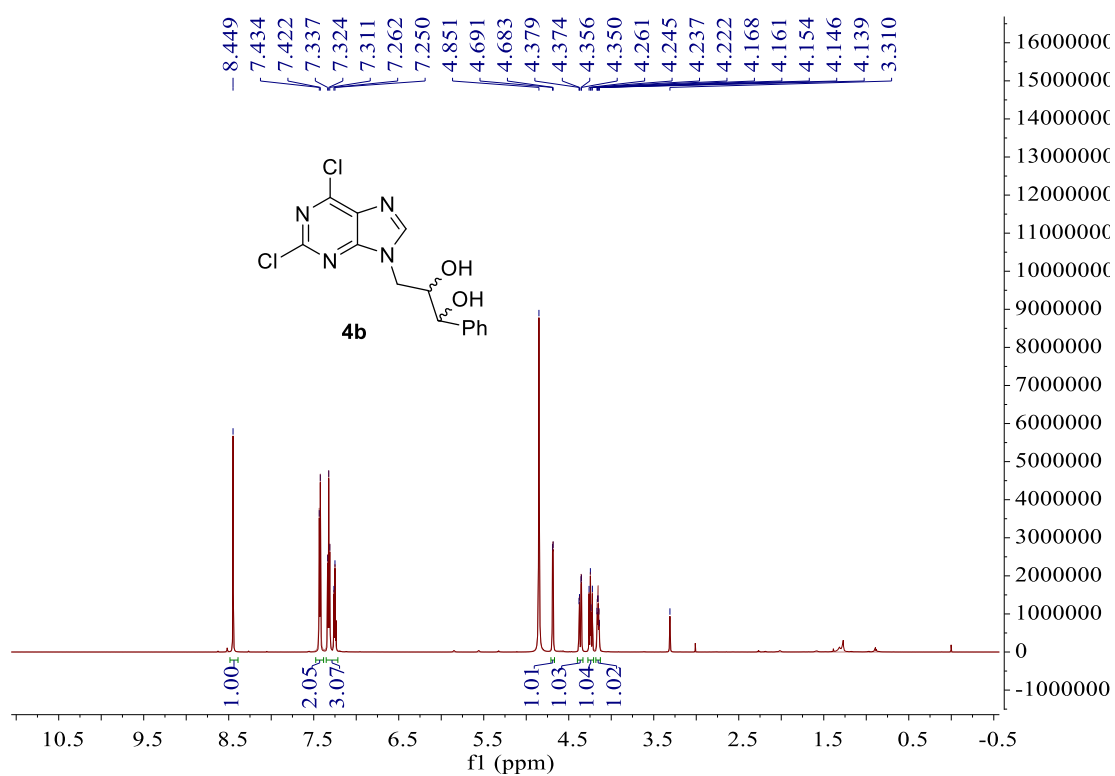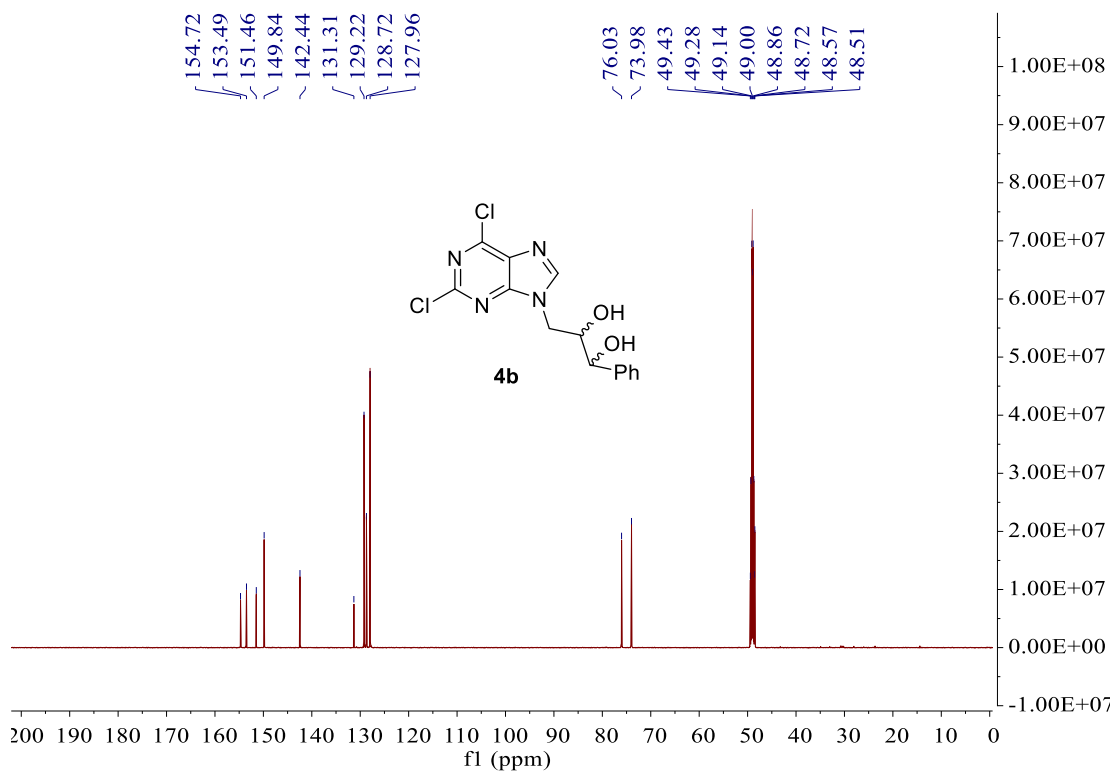

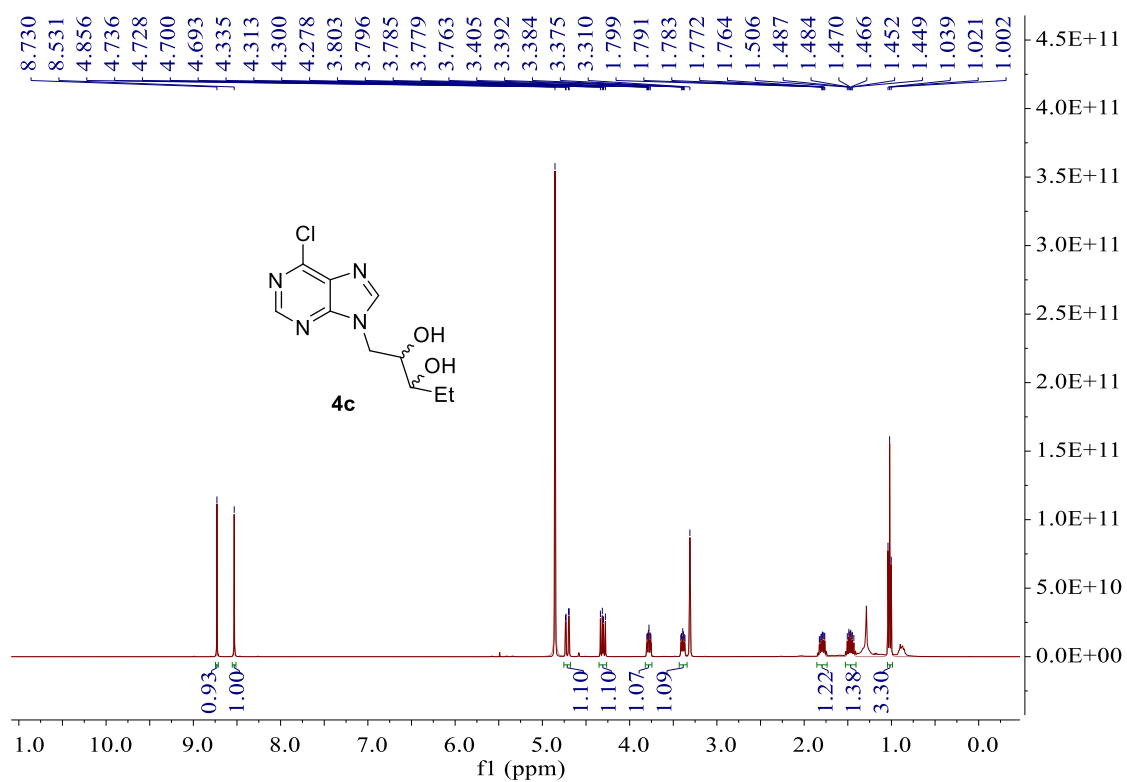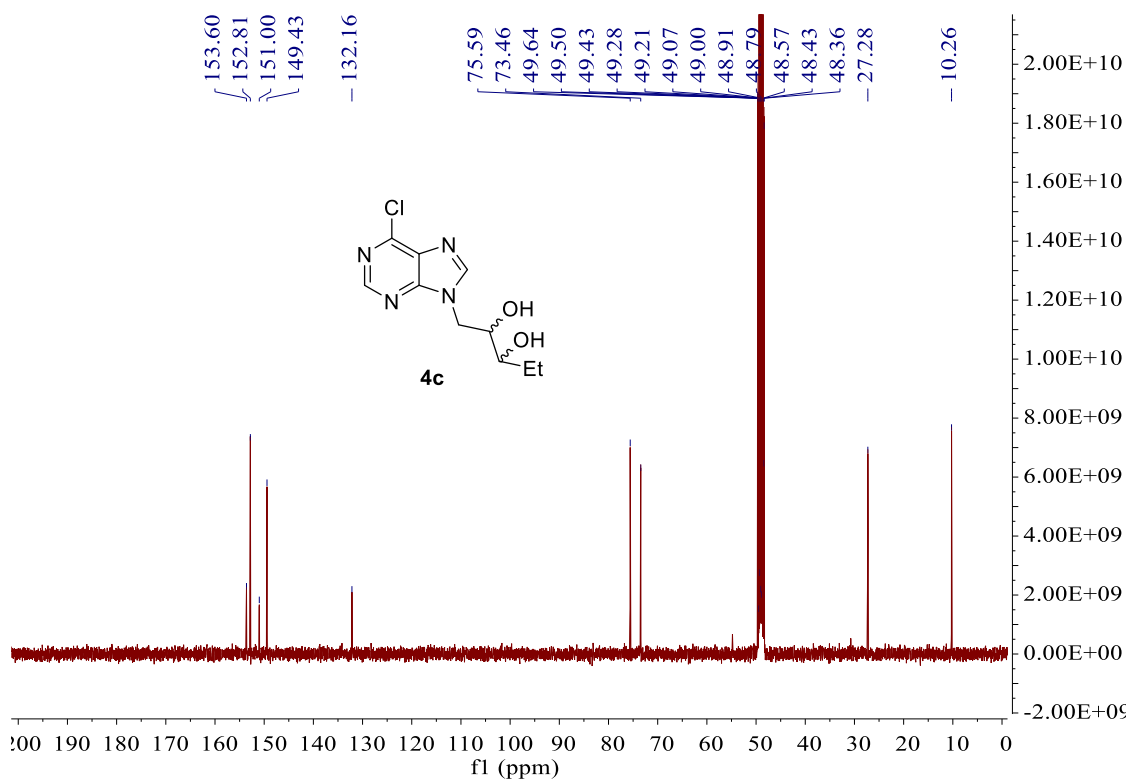

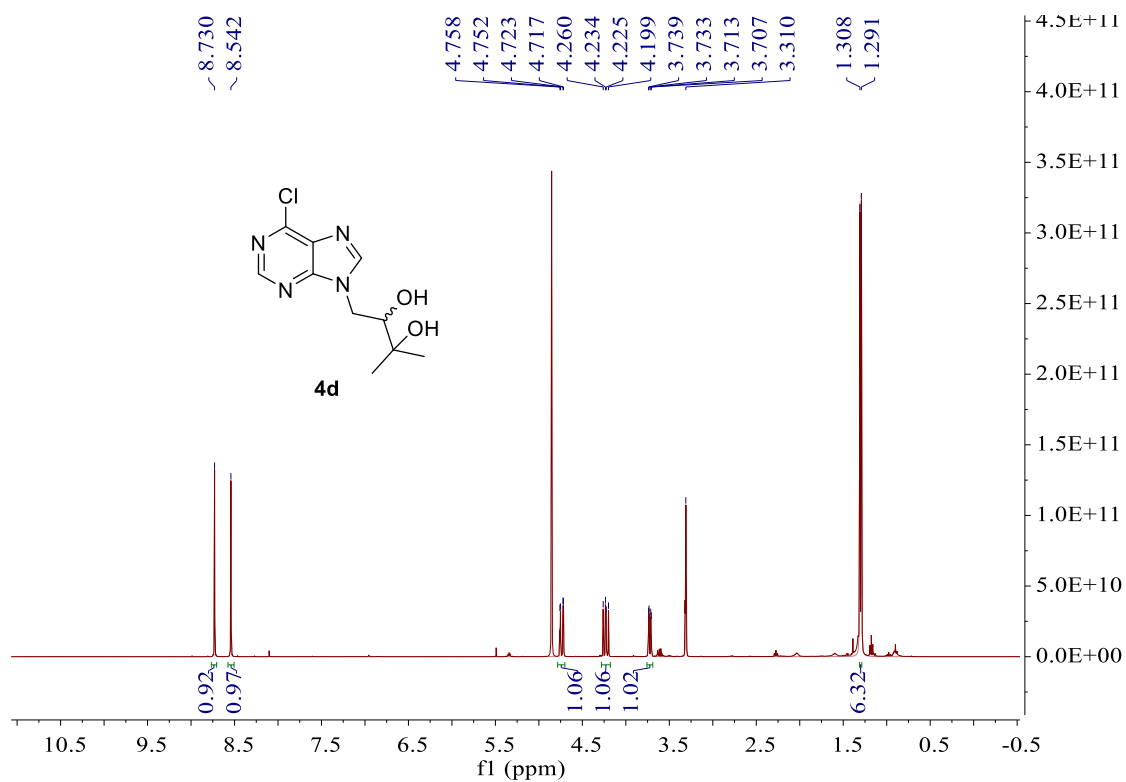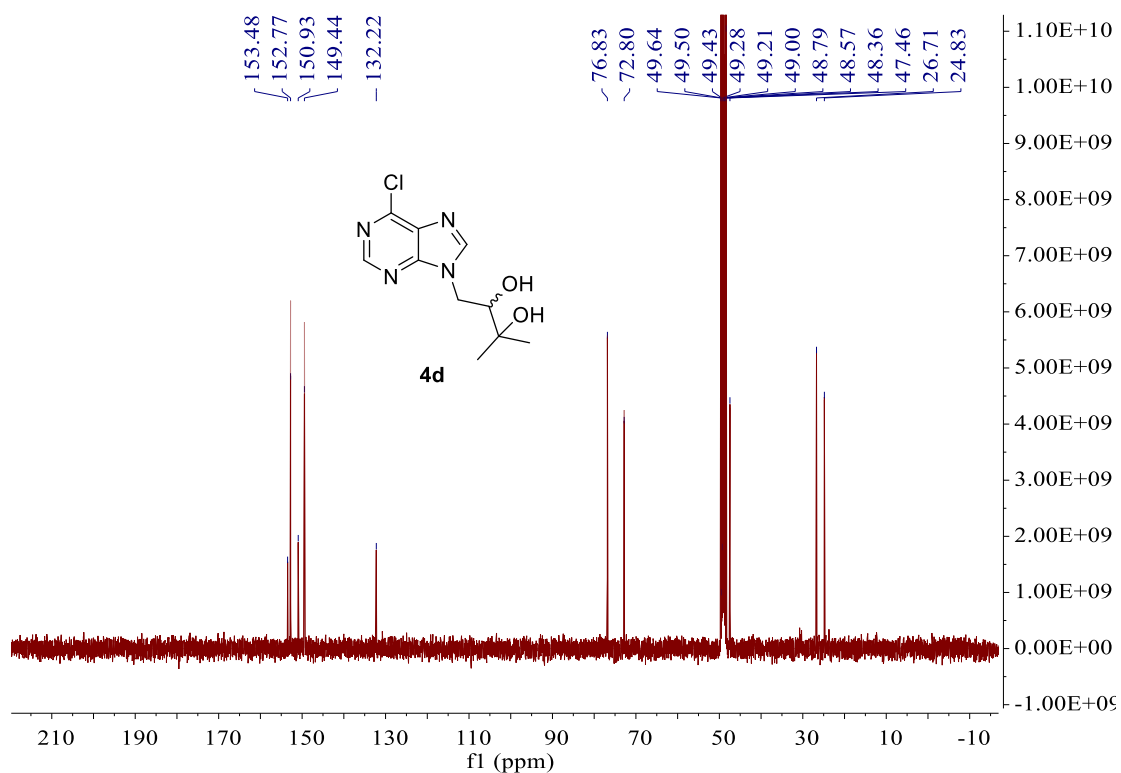

## 6. Copies of HPLC spectra for racemic and chiral products

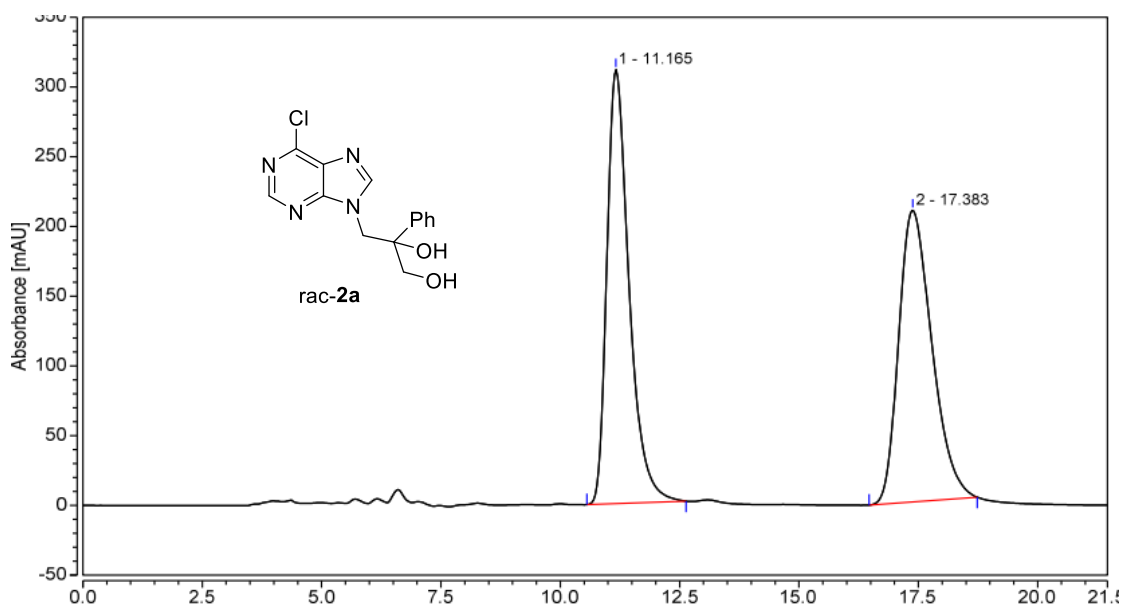

| Peak          | Retention Time<br>min | Area<br>mAU*min | Height<br>mAU  | Area<br>%     | Height<br>%   |
|---------------|-----------------------|-----------------|----------------|---------------|---------------|
| 1             | 11.165                | 167.352         | 311.121        | 49.82         | 59.80         |
| 2             | 17.383                | 168.594         | 209.119        | 50.18         | 40.20         |
| <b>Total:</b> |                       | <b>335.946</b>  | <b>520.240</b> | <b>100.00</b> | <b>100.00</b> |

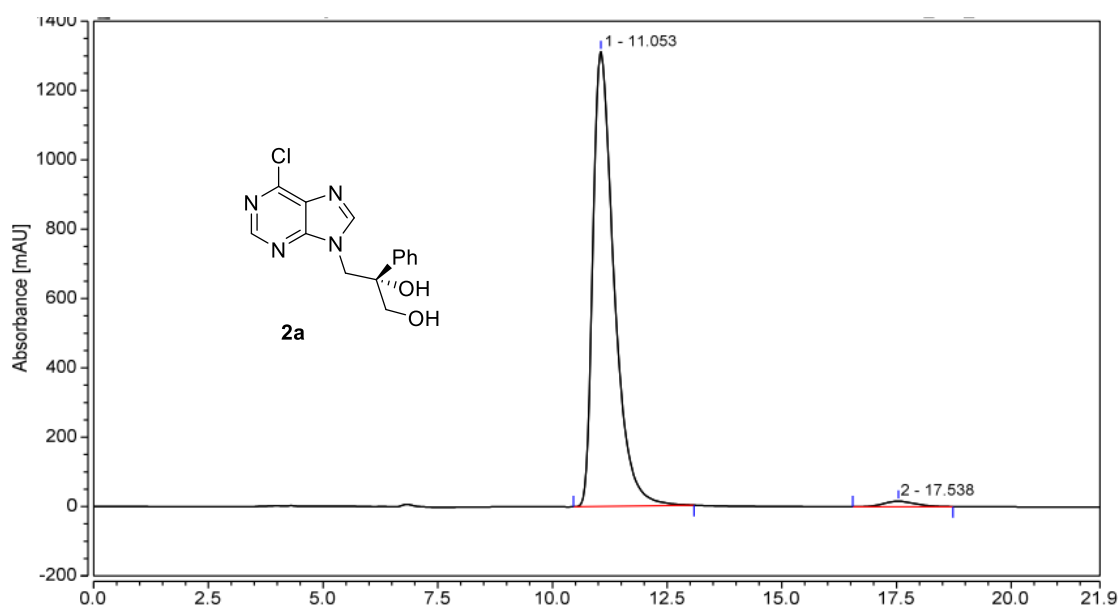

| Peak          | Retention Time<br>min | Area<br>mAU*min | Height<br>mAU   | Area<br>%     | Height<br>%   |
|---------------|-----------------------|-----------------|-----------------|---------------|---------------|
| 1             | 11.053                | 701.300         | 1311.749        | 98.23         | 98.80         |
| 2             | 17.538                | 12.660          | 15.895          | 1.77          | 1.20          |
| <b>Total:</b> |                       | <b>713.960</b>  | <b>1327.644</b> | <b>100.00</b> | <b>100.00</b> |

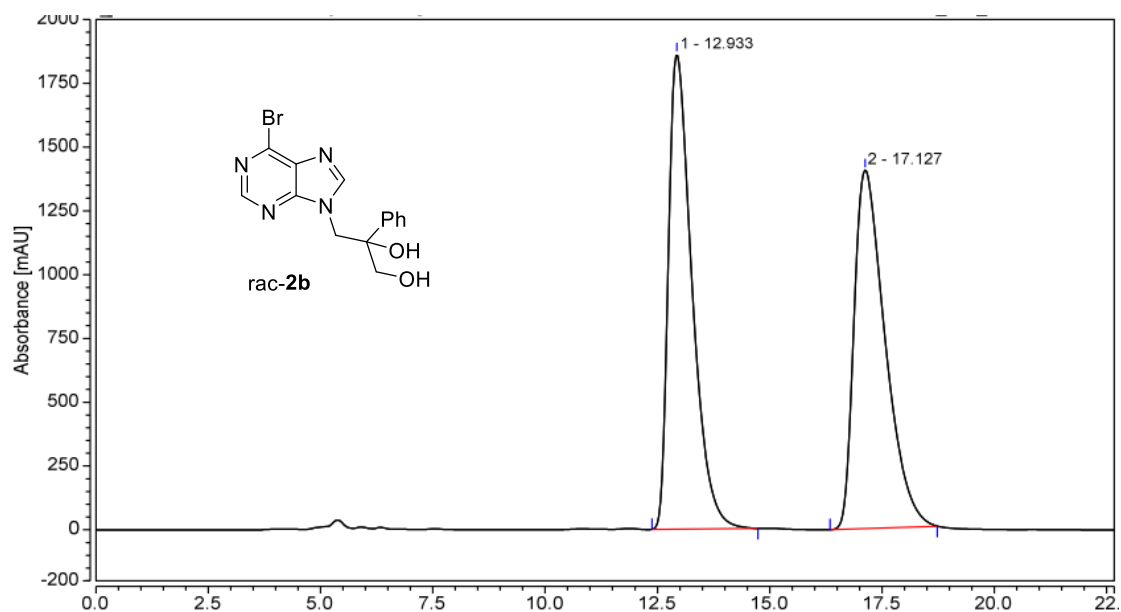

| Peak          | Retention Time<br>min | Area<br>mAU*min | Height<br>mAU   | Area<br>%     | Height<br>%   |
|---------------|-----------------------|-----------------|-----------------|---------------|---------------|
| 1             | 12.933                | 1136.935        | 1862.039        | 50.26         | 56.99         |
| 2             | 17.127                | 1125.214        | 1405.105        | 49.74         | 43.01         |
| <b>Total:</b> |                       | <b>2262.149</b> | <b>3267.144</b> | <b>100.00</b> | <b>100.00</b> |

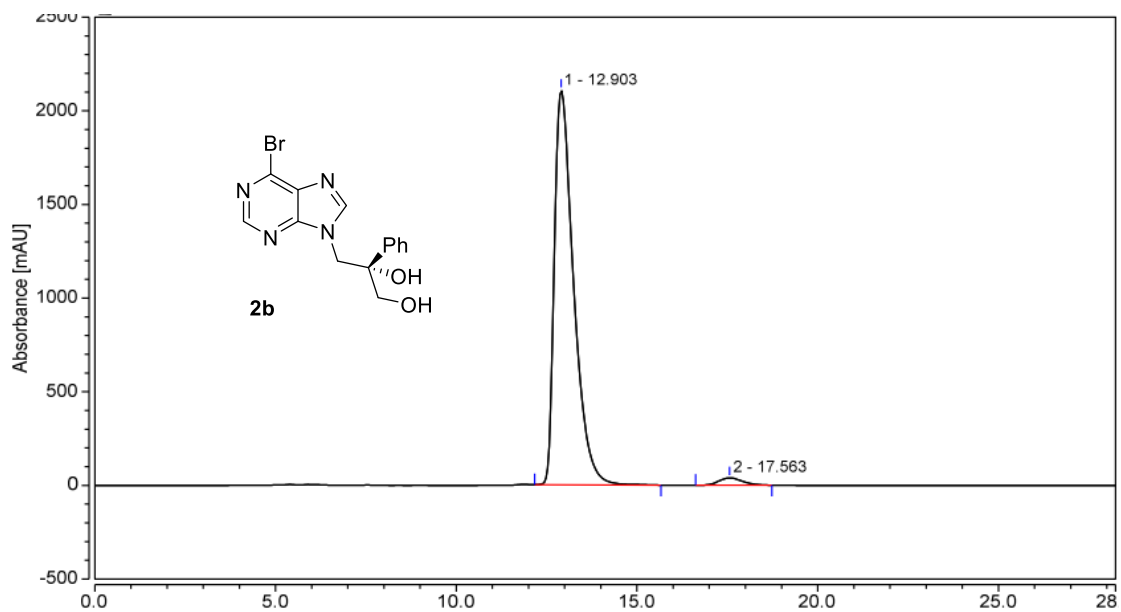

| Peak          | Retention Time<br>min | Area<br>mAU*min | Height<br>mAU   | Area<br>%     | Height<br>%   |
|---------------|-----------------------|-----------------|-----------------|---------------|---------------|
| 1             | 12.903                | 1299.200        | 2106.591        | 97.74         | 98.18         |
| 2             | 17.563                | 30.009          | 39.047          | 2.26          | 1.82          |
| <b>Total:</b> |                       | <b>1329.210</b> | <b>2145.638</b> | <b>100.00</b> | <b>100.00</b> |

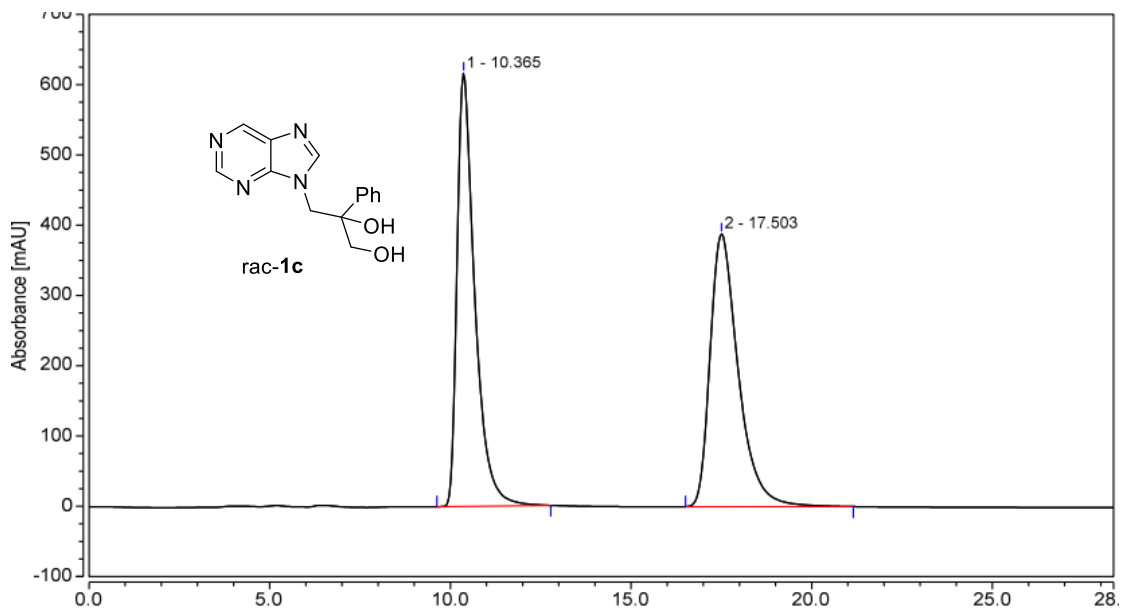

| Peak          | Retention Time<br>min | Area<br>mAU*min | Height<br>mAU   | Area<br>%     | Height<br>%   |
|---------------|-----------------------|-----------------|-----------------|---------------|---------------|
| 1             | 10.365                | 350.900         | 616.267         | 50.01         | 61.36         |
| 2             | 17.503                | 350.772         | 388.160         | 49.99         | 38.64         |
| <b>Total:</b> |                       | <b>701.672</b>  | <b>1004.427</b> | <b>100.00</b> | <b>100.00</b> |

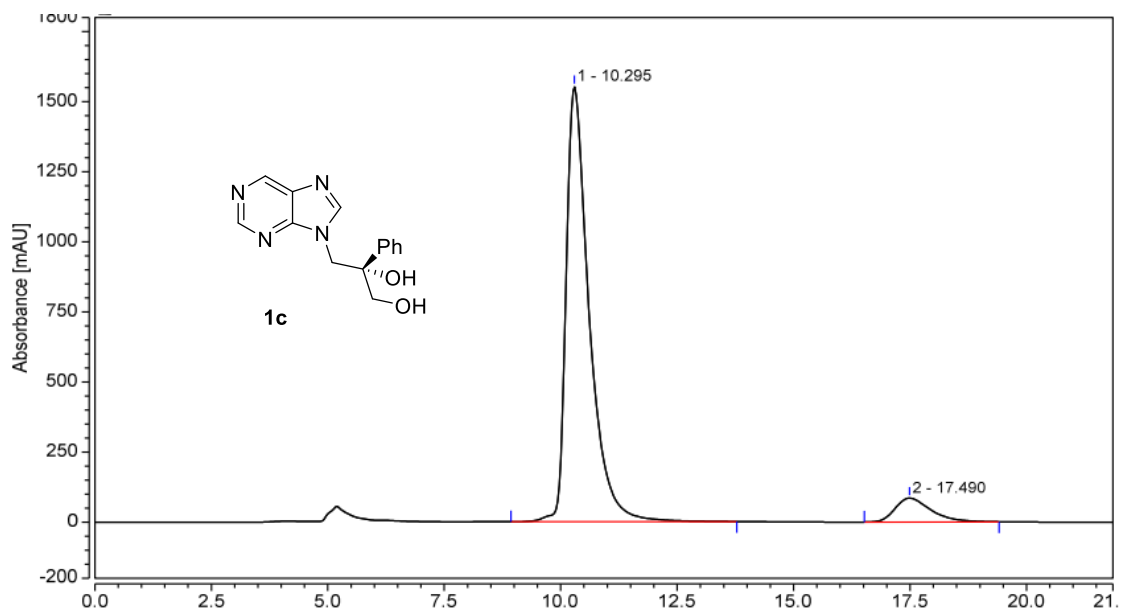

| Peak          | Retention Time<br>min | Area<br>mAU*min | Height<br>mAU   | Area<br>%     | Height<br>%   |
|---------------|-----------------------|-----------------|-----------------|---------------|---------------|
| 1             | 10.295                | 890.426         | 1552.128        | 92.17         | 94.80         |
| 2             | 17.490                | 75.681          | 85.071          | 7.83          | 5.20          |
| <b>Total:</b> |                       | <b>966.107</b>  | <b>1637.199</b> | <b>100.00</b> | <b>100.00</b> |

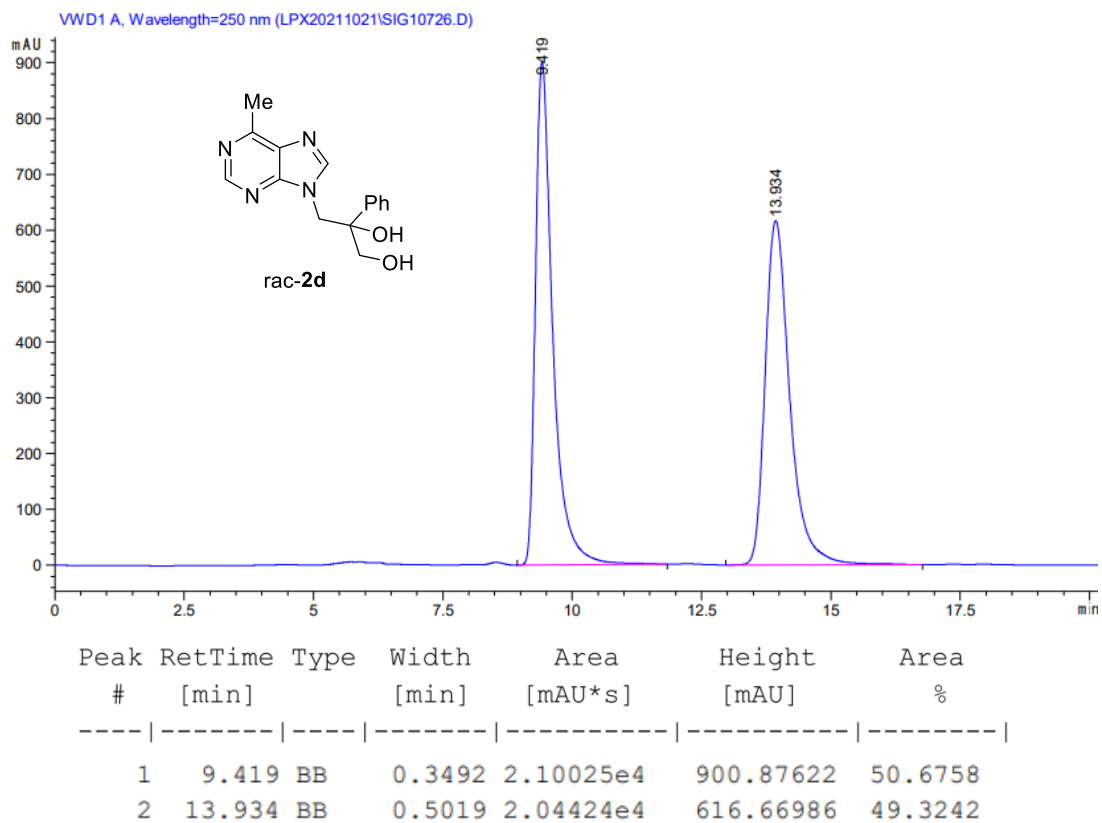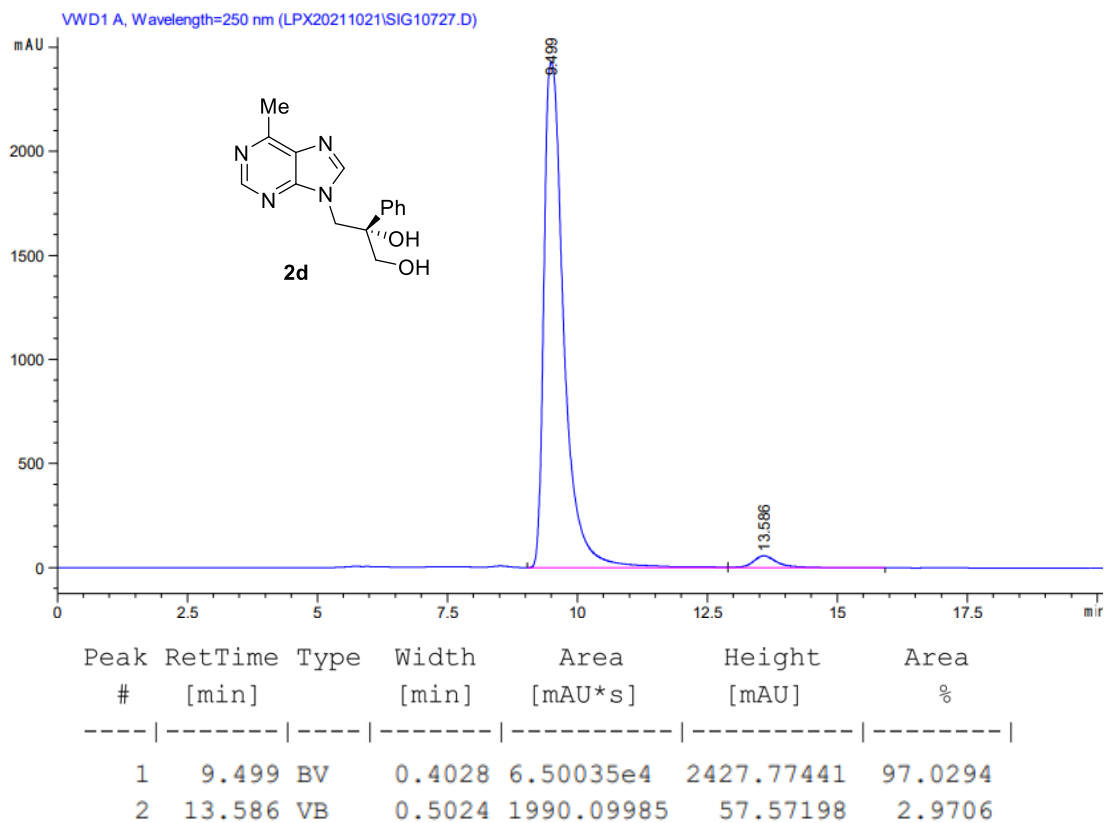

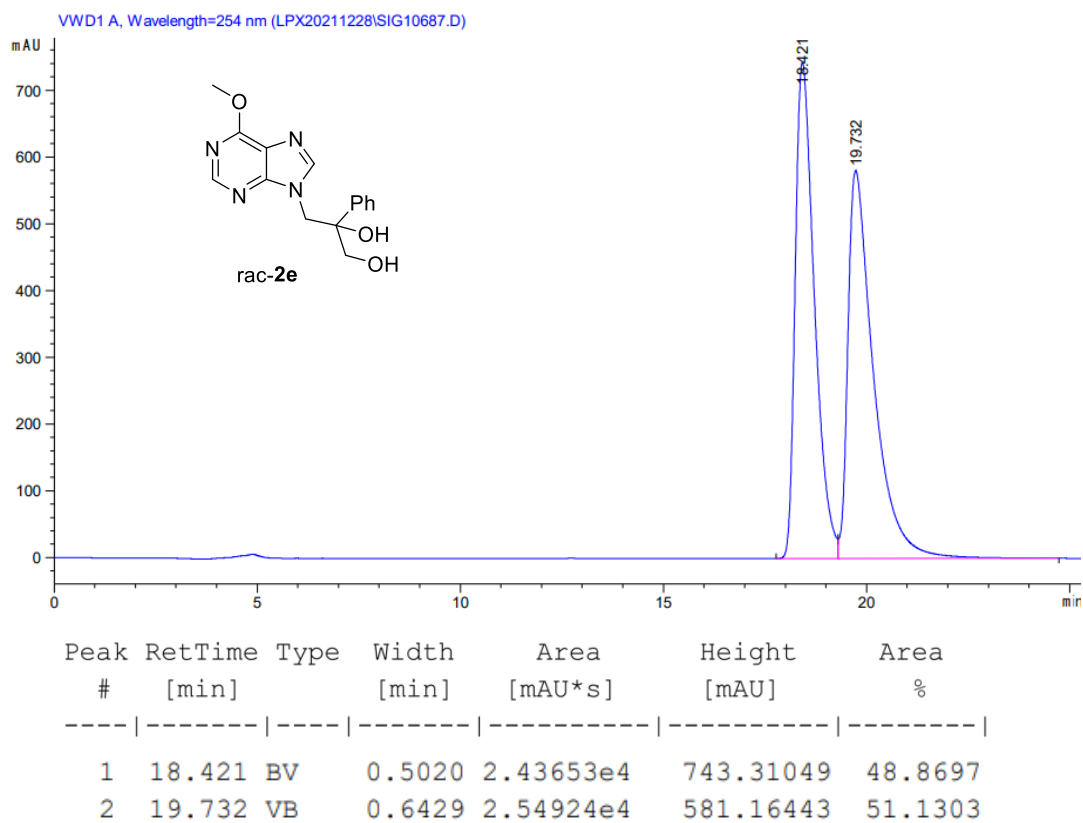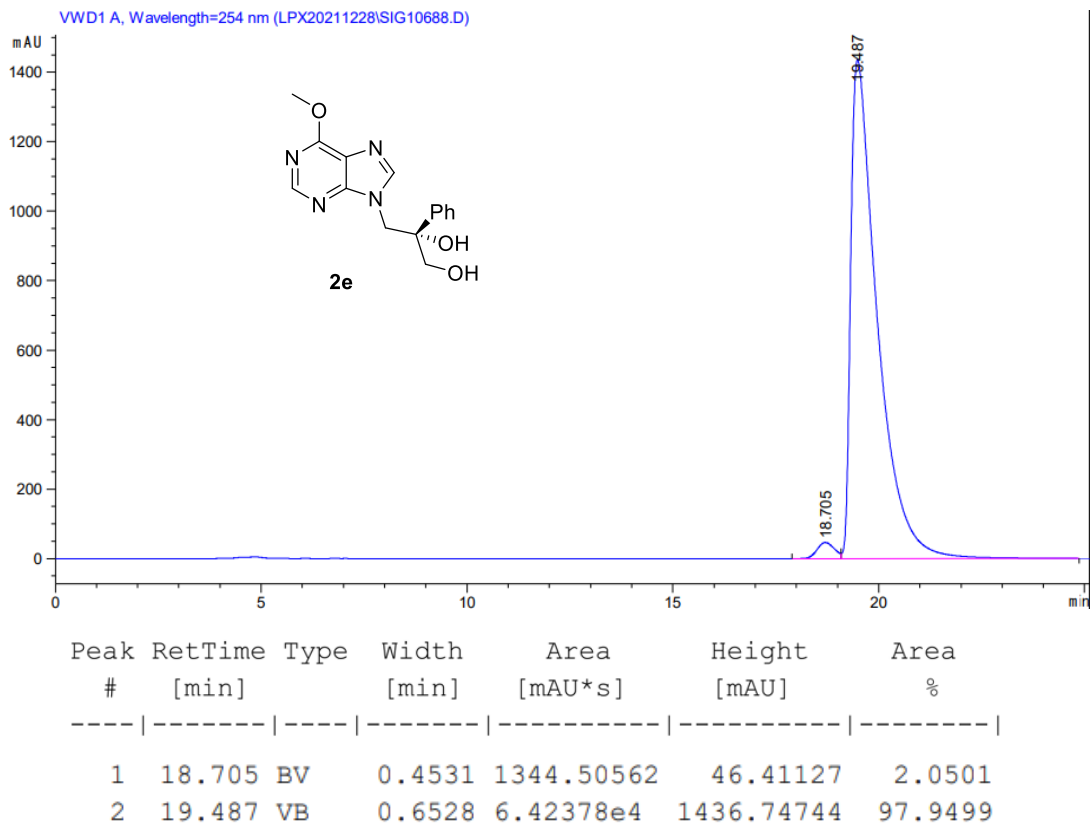

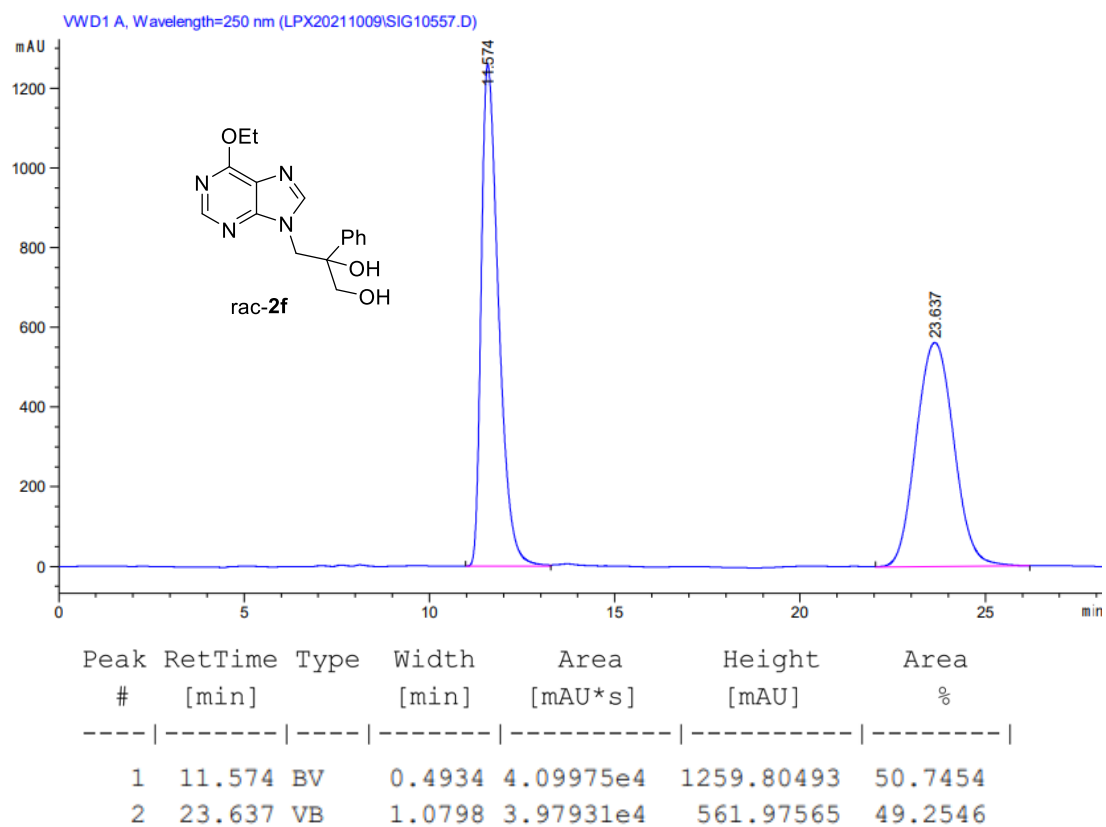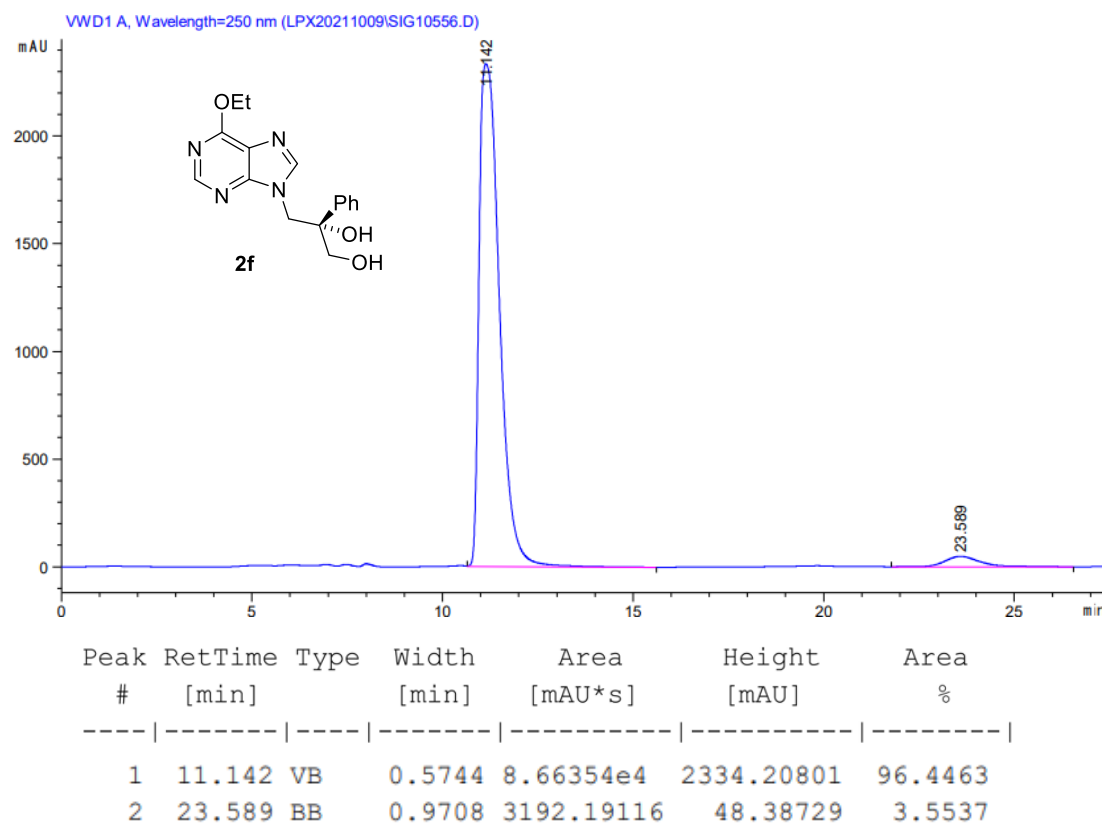

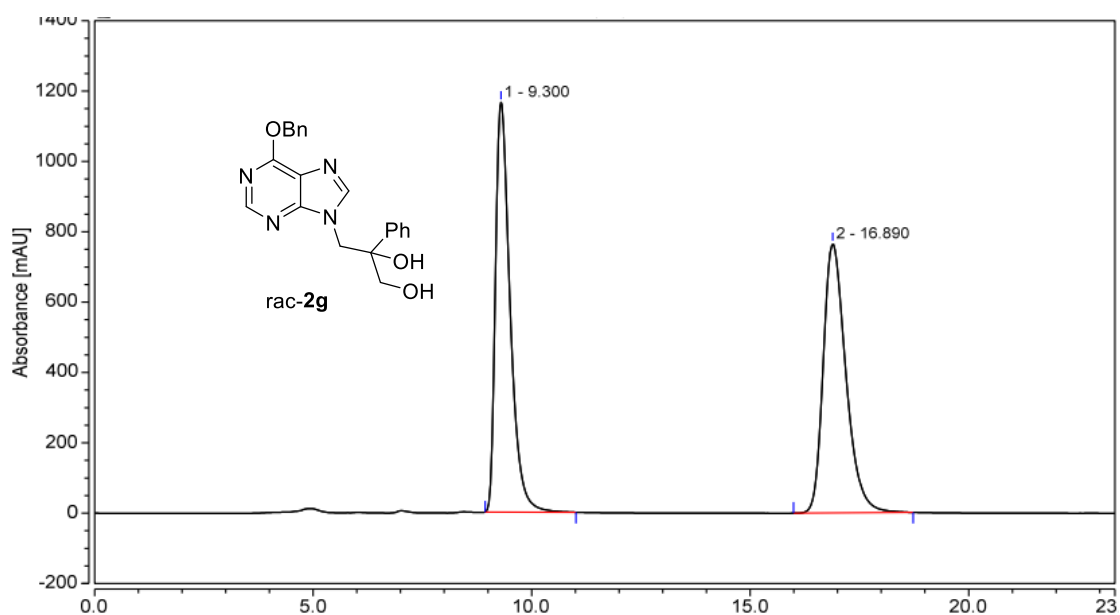

| Peak          | Retention Time<br>min | Area<br>mAU*min | Height<br>mAU   | Area<br>%     | Height<br>%   |
|---------------|-----------------------|-----------------|-----------------|---------------|---------------|
| 1             | 9.300                 | 450.531         | 1165.175        | 49.51         | 60.35         |
| 2             | 16.890                | 459.428         | 765.490         | 50.49         | 39.65         |
| <b>Total:</b> |                       | <b>909.960</b>  | <b>1930.665</b> | <b>100.00</b> | <b>100.00</b> |

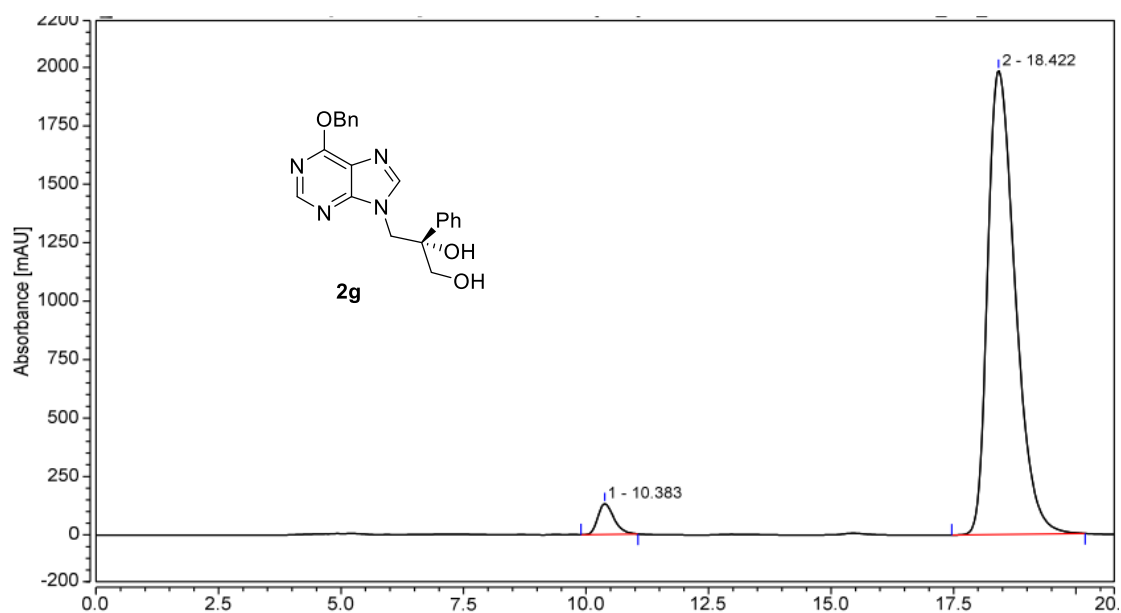

| Peak          | Retention Time<br>min | Area<br>mAU*min | Height<br>mAU   | Area<br>%     | Height<br>%   |
|---------------|-----------------------|-----------------|-----------------|---------------|---------------|
| 1             | 10.383                | 50.304          | 131.164         | 3.74          | 6.20          |
| 2             | 18.422                | 1293.865        | 1983.993        | 96.26         | 93.80         |
| <b>Total:</b> |                       | <b>1344.168</b> | <b>2115.157</b> | <b>100.00</b> | <b>100.00</b> |

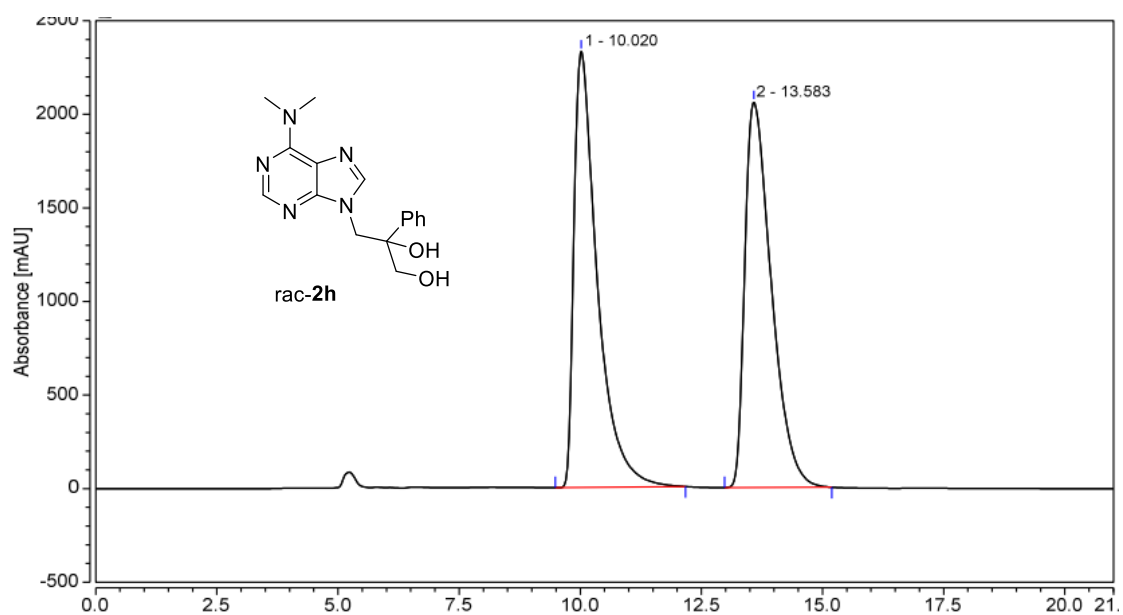

| Peak          | Retention Time<br>min | Area<br>mAU*min | Height<br>mAU   | Area<br>%     | Height<br>%   |
|---------------|-----------------------|-----------------|-----------------|---------------|---------------|
| 1             | 10.020                | 1303.164        | 2330.252        | 49.93         | 53.08         |
| 2             | 13.583                | 1307.052        | 2060.051        | 50.07         | 46.92         |
| <b>Total:</b> |                       | <b>2610.216</b> | <b>4390.303</b> | <b>100.00</b> | <b>100.00</b> |

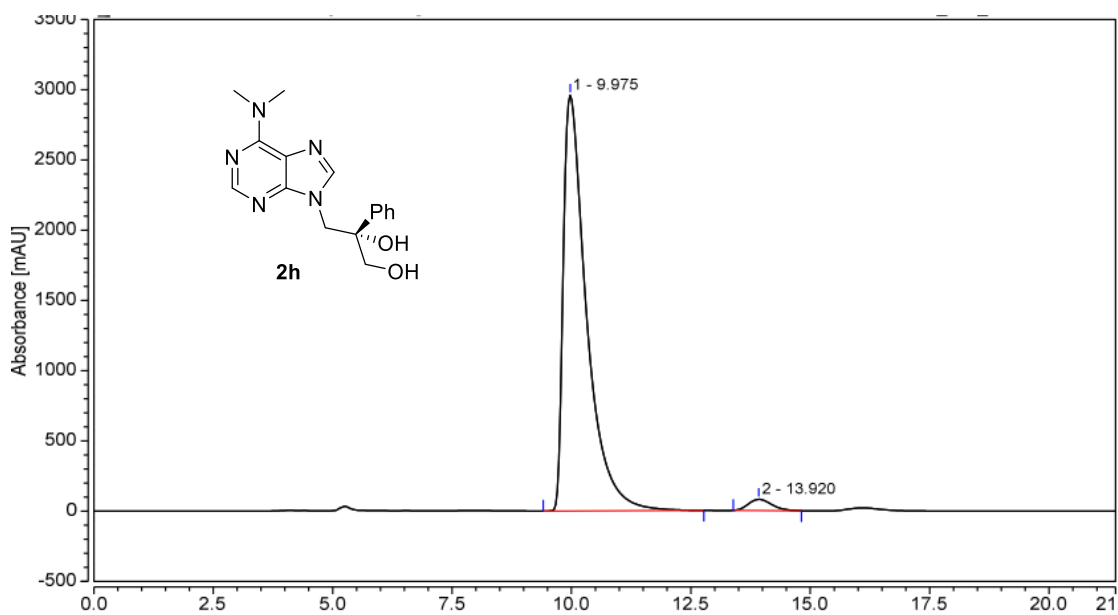

| Peak          | Retention Time<br>min | Area<br>mAU*min | Height<br>mAU   | Area<br>%     | Height<br>%   |
|---------------|-----------------------|-----------------|-----------------|---------------|---------------|
| 1             | 9.975                 | 1671.614        | 2959.782        | 97.39         | 97.38         |
| 2             | 13.920                | 44.731          | 79.707          | 2.61          | 2.62          |
| <b>Total:</b> |                       | <b>1716.345</b> | <b>3039.489</b> | <b>100.00</b> | <b>100.00</b> |

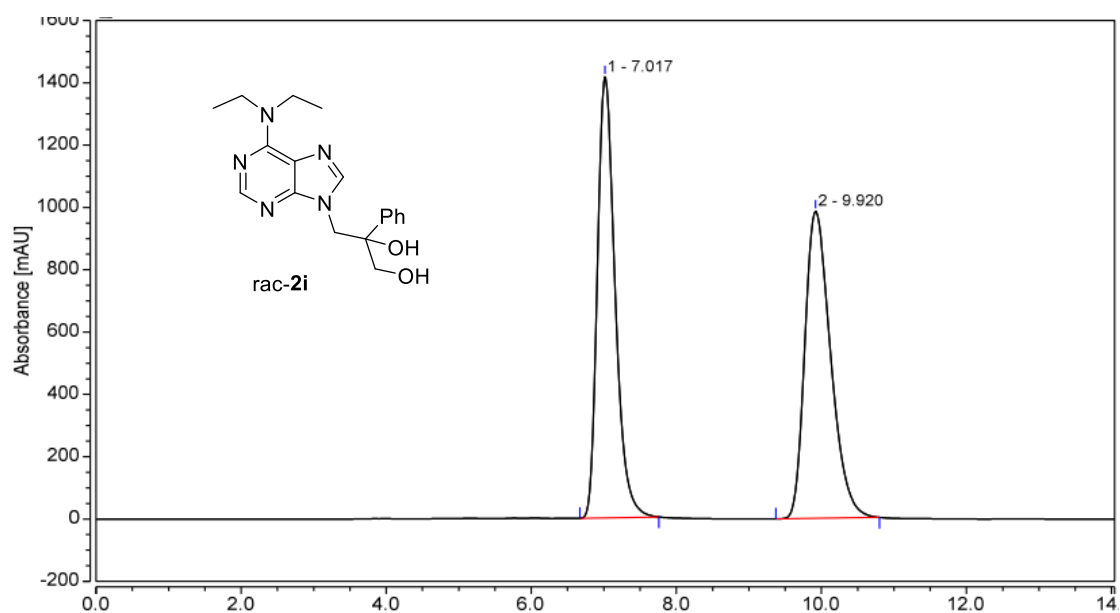

| Peak          | Retention Time<br>min | Area<br>mAU*min | Height<br>mAU   | Area<br>%     | Height<br>%   |
|---------------|-----------------------|-----------------|-----------------|---------------|---------------|
| 1             | 7.017                 | 401.605         | 1415.680        | 49.72         | 58.95         |
| 2             | 9.920                 | 406.101         | 985.818         | 50.28         | 41.05         |
| <b>Total:</b> |                       | <b>807.706</b>  | <b>2401.498</b> | <b>100.00</b> | <b>100.00</b> |

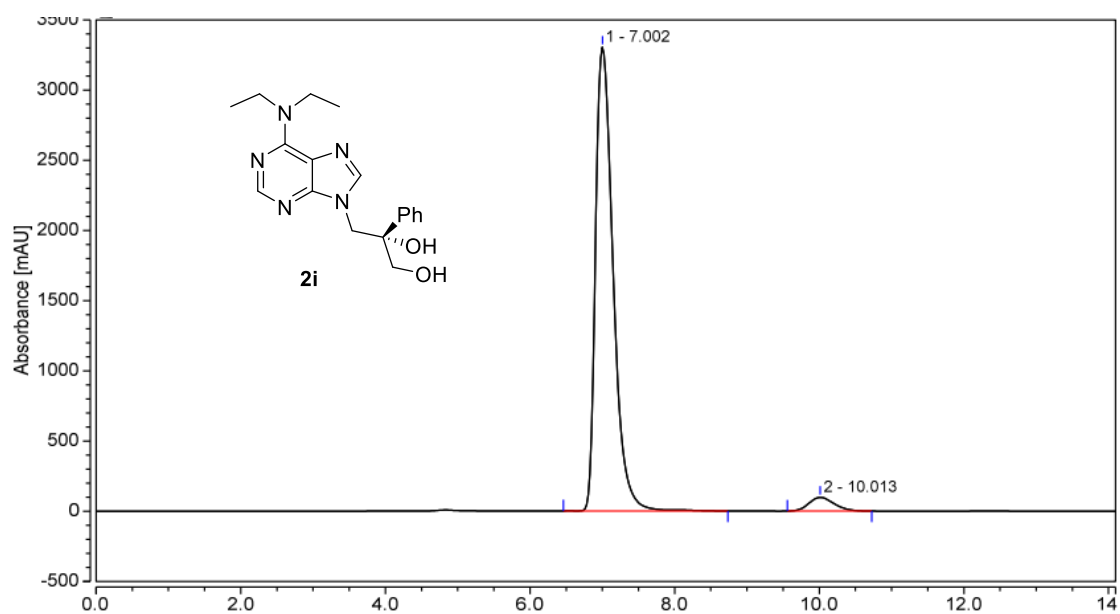

| Peak          | Retention Time<br>min | Area<br>mAU*min | Height<br>mAU   | Area<br>%     | Height<br>%   |
|---------------|-----------------------|-----------------|-----------------|---------------|---------------|
| 1             | 7.002                 | 929.340         | 3303.169        | 95.90         | 97.13         |
| 2             | 10.013                | 39.770          | 97.676          | 4.10          | 2.87          |
| <b>Total:</b> |                       | <b>969.110</b>  | <b>3400.845</b> | <b>100.00</b> | <b>100.00</b> |

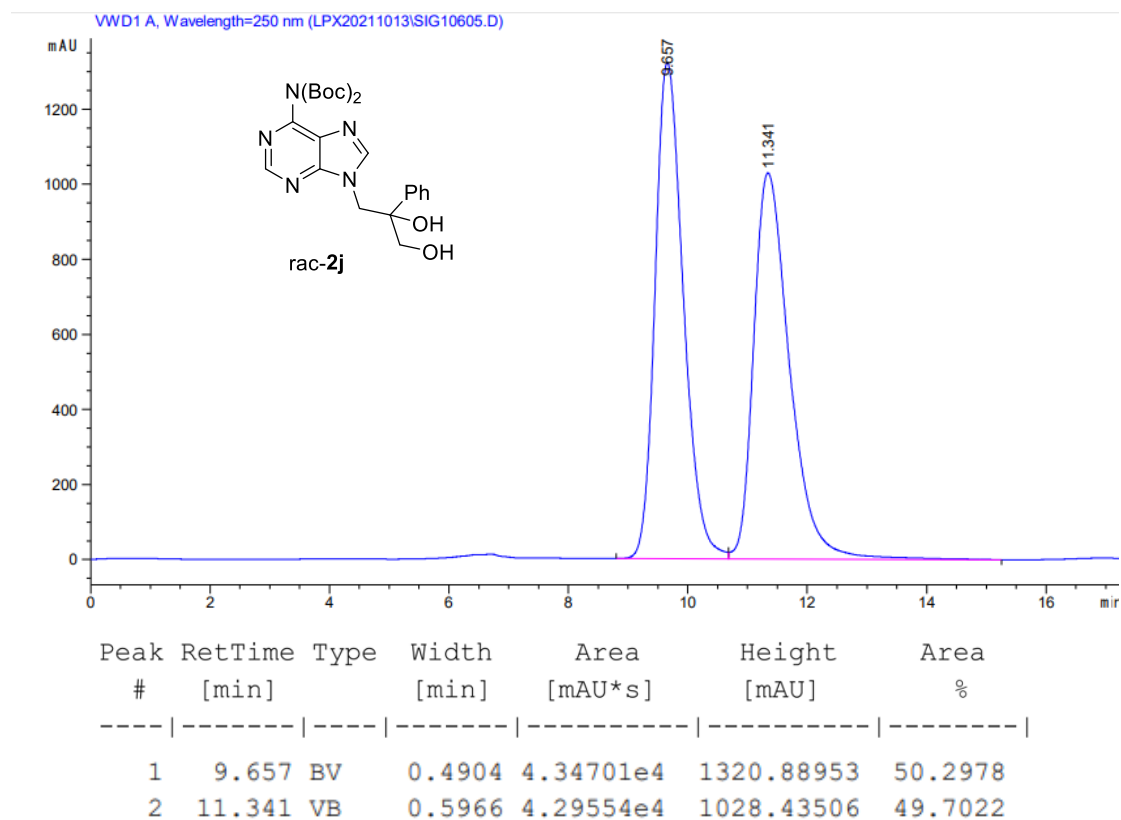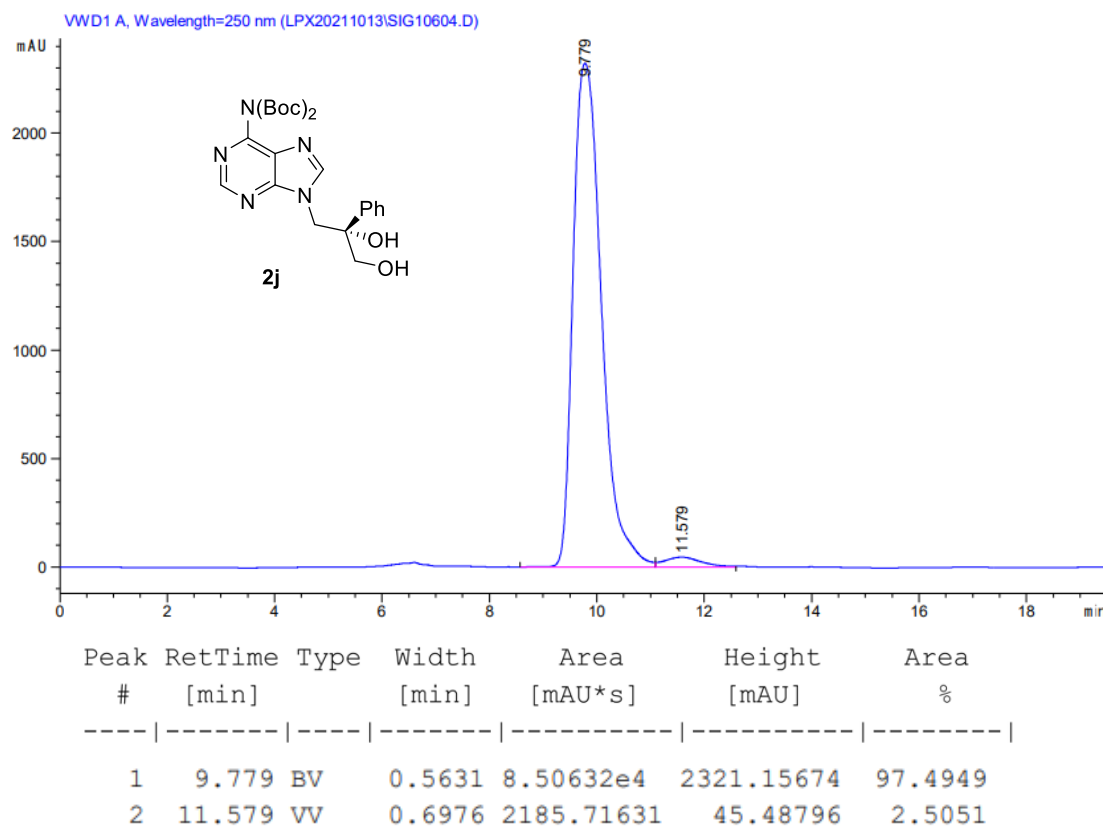

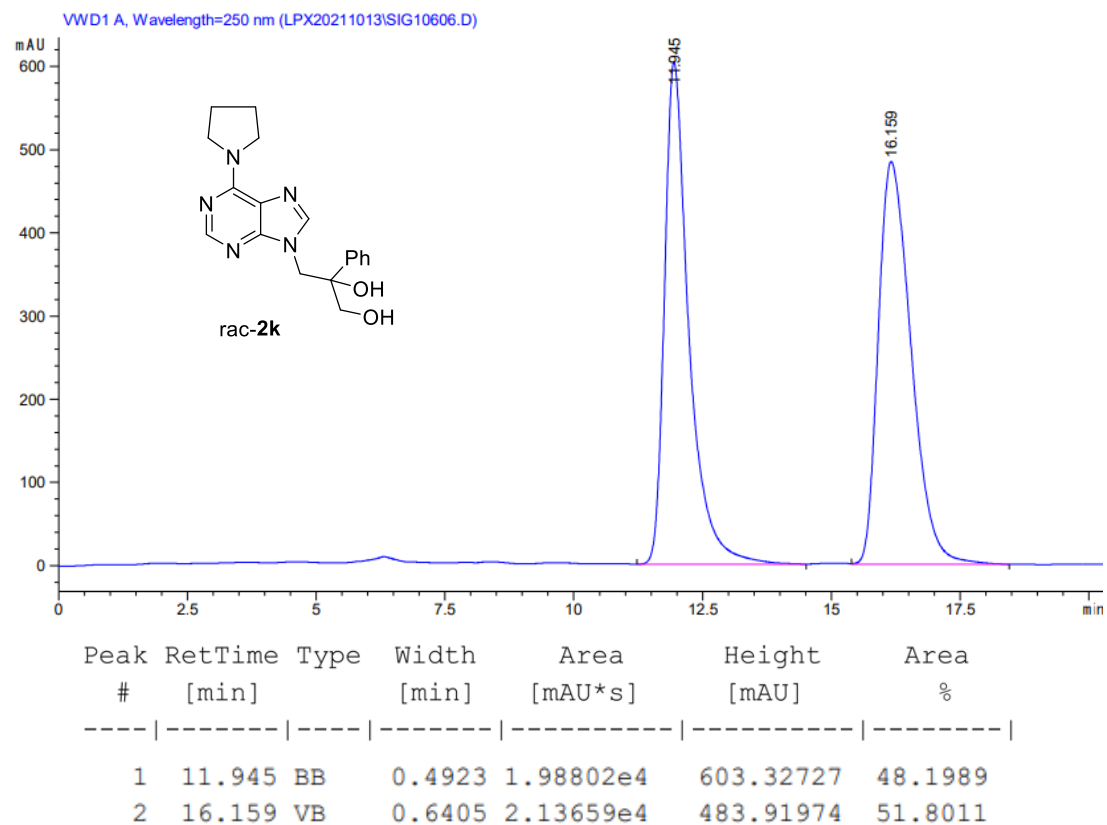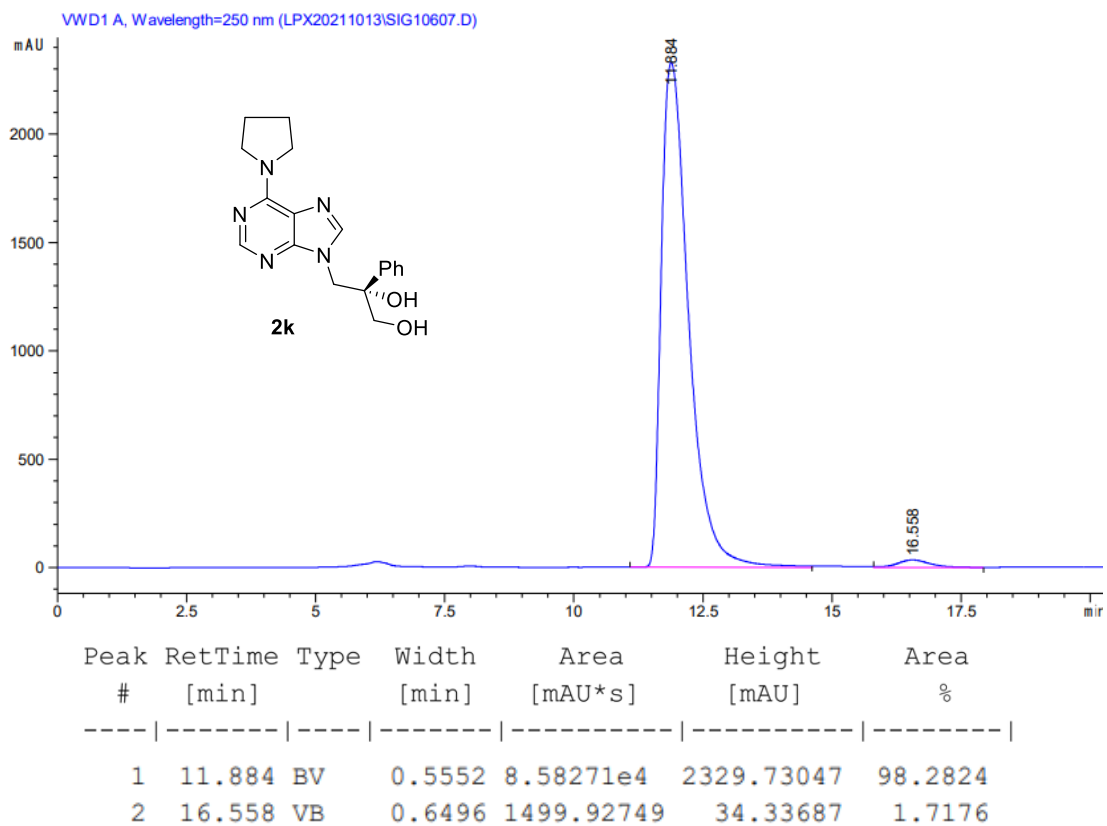

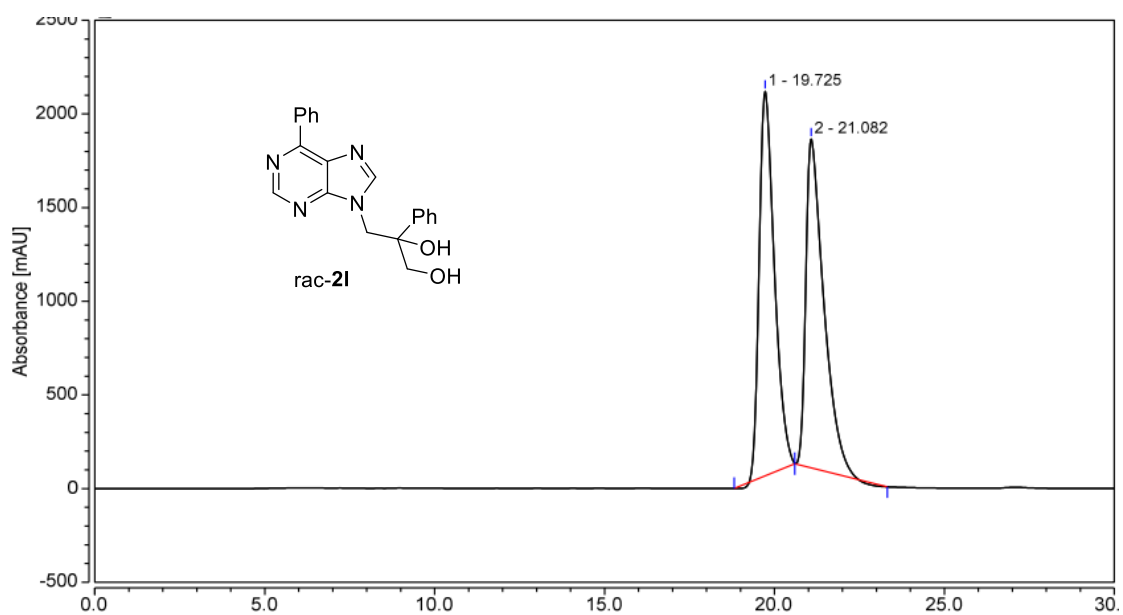

| Peak          | Retention Time<br>min | Area<br>mAU*min | Height<br>mAU   | Area<br>%     | Height<br>%   |
|---------------|-----------------------|-----------------|-----------------|---------------|---------------|
| 1             | 19.725                | 1061.623        | 2052.494        | 49.69         | 53.91         |
| 2             | 21.082                | 1074.802        | 1754.904        | 50.31         | 46.09         |
| <b>Total:</b> |                       | <b>2136.425</b> | <b>3807.398</b> | <b>100.00</b> | <b>100.00</b> |

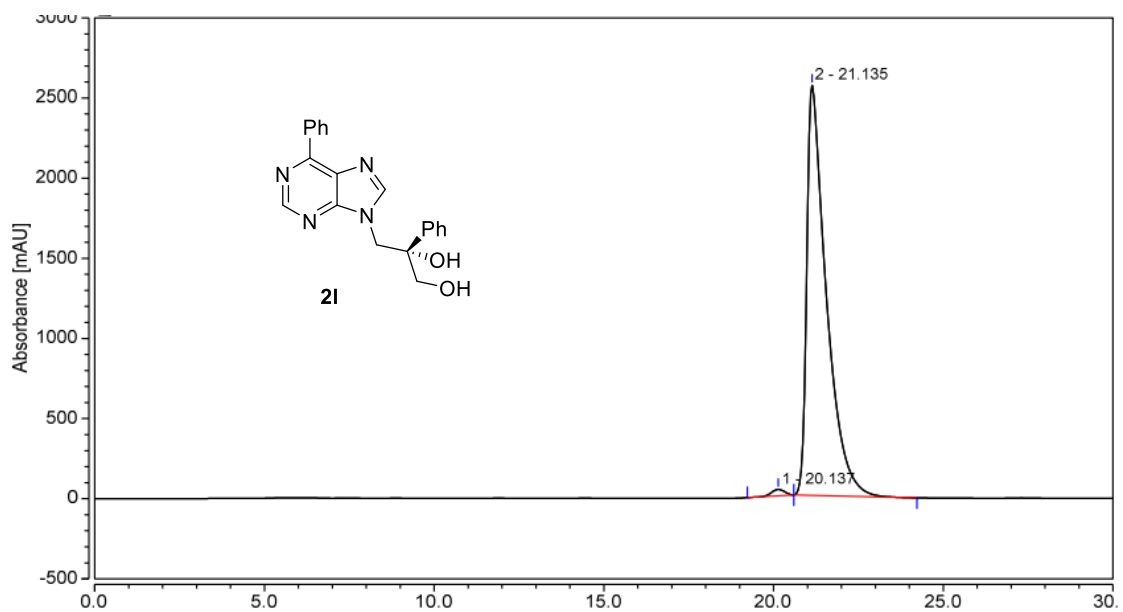

| Peak          | Retention Time<br>min | Area<br>mAU*min | Height<br>mAU   | Area<br>%     | Height<br>%   |
|---------------|-----------------------|-----------------|-----------------|---------------|---------------|
| 1             | 20.137                | 18.209          | 40.109          | 1.06          | 1.54          |
| 2             | 21.135                | 1705.939        | 2559.155        | 98.94         | 98.46         |
| <b>Total:</b> |                       | <b>1724.148</b> | <b>2599.264</b> | <b>100.00</b> | <b>100.00</b> |

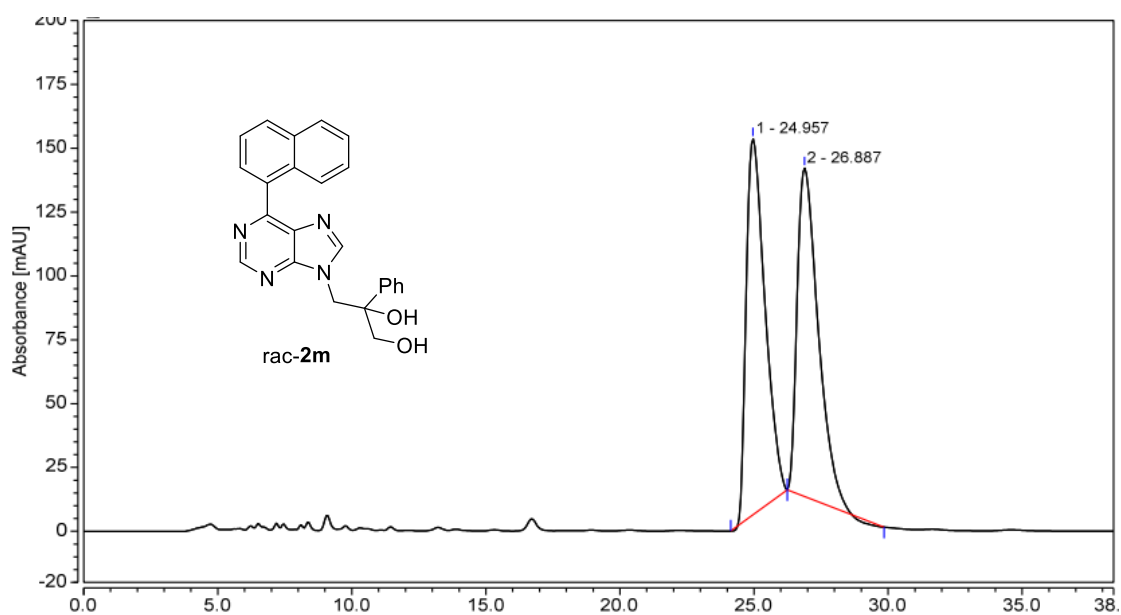

| Peak          | Retention Time<br>min | Area<br>mAU*min | Height<br>mAU  | Area<br>%     | Height<br>%   |
|---------------|-----------------------|-----------------|----------------|---------------|---------------|
| 1             | 24.957                | 118.682         | 147.294        | 50.40         | 53.39         |
| 2             | 26.887                | 116.793         | 128.605        | 49.60         | 46.61         |
| <b>Total:</b> |                       | <b>235.475</b>  | <b>275.899</b> | <b>100.00</b> | <b>100.00</b> |

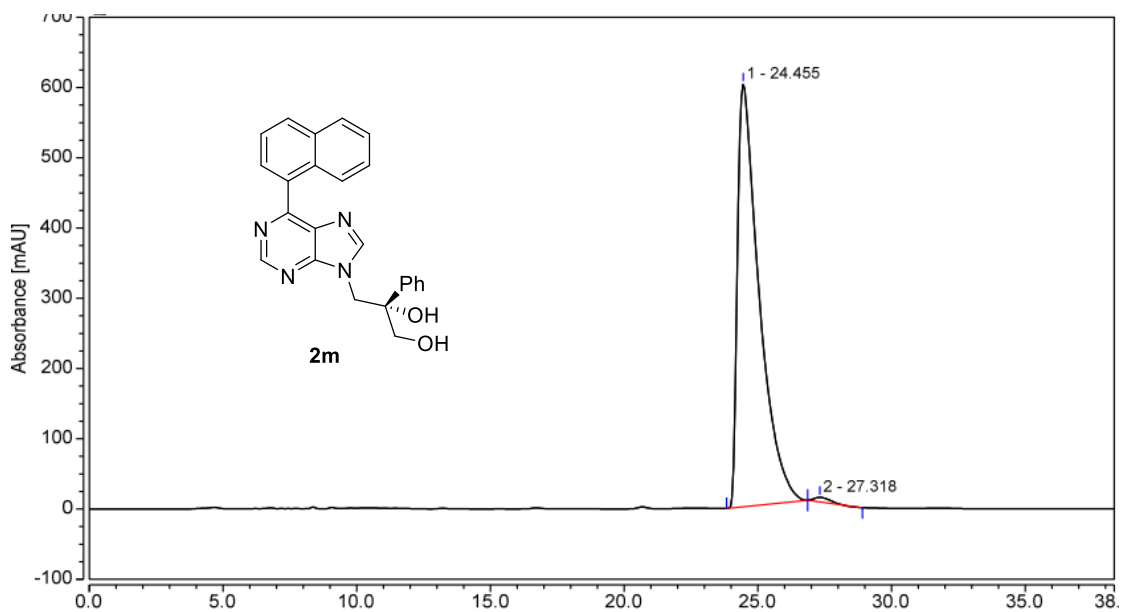

| Peak          | Retention Time<br>min | Area<br>mAU*min | Height<br>mAU  | Area<br>%     | Height<br>%   |
|---------------|-----------------------|-----------------|----------------|---------------|---------------|
| 1             | 24.455                | 563.081         | 601.969        | 99.25         | 98.93         |
| 2             | 27.318                | 4.277           | 6.500          | 0.75          | 1.07          |
| <b>Total:</b> |                       | <b>567.358</b>  | <b>608.469</b> | <b>100.00</b> | <b>100.00</b> |

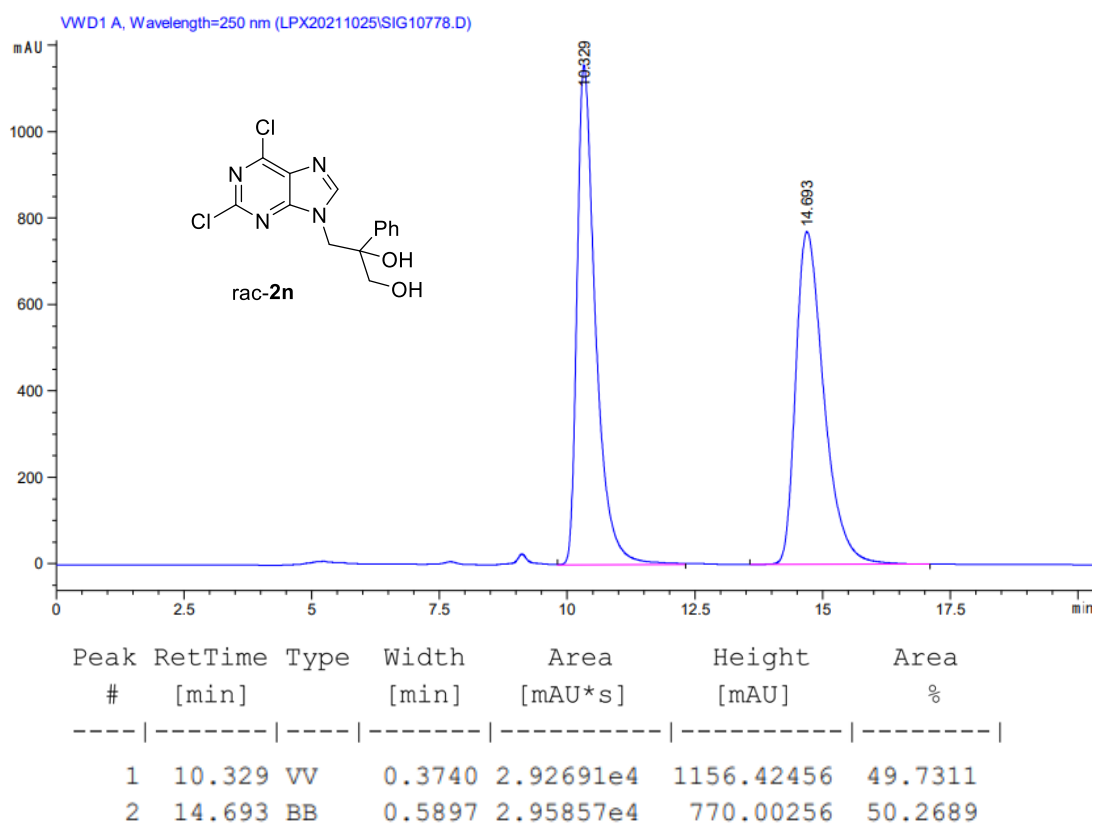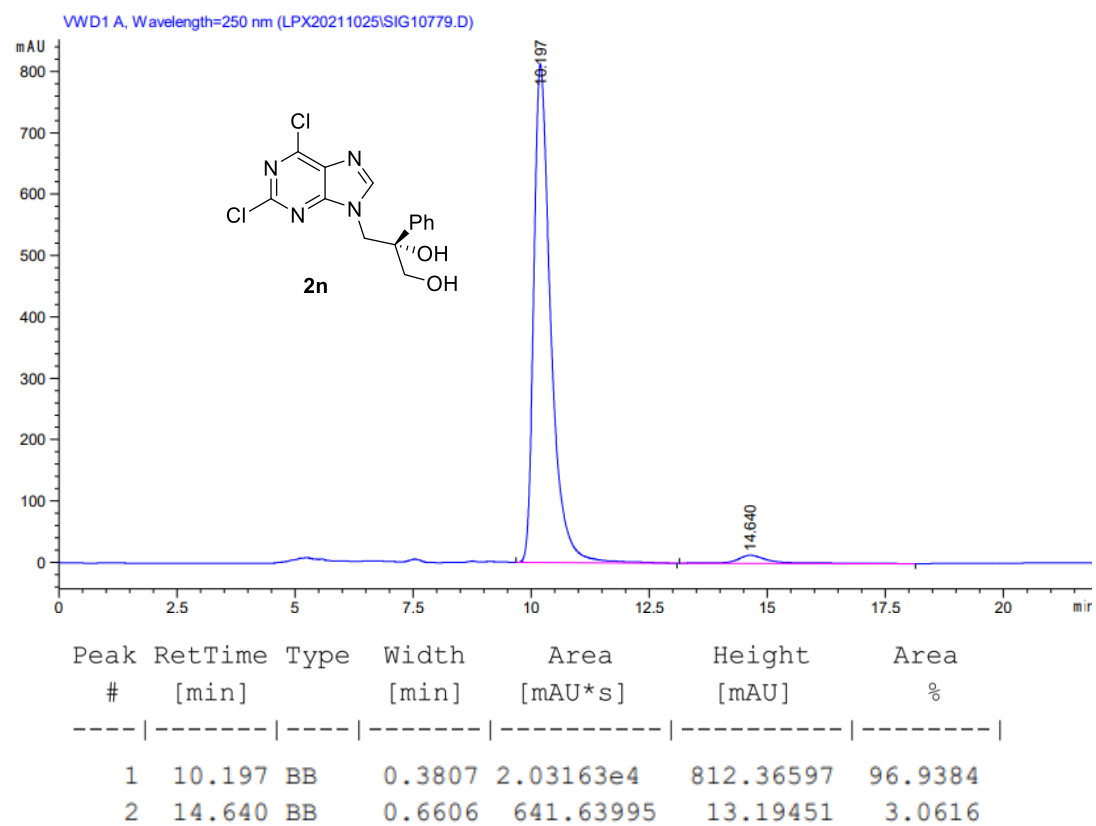

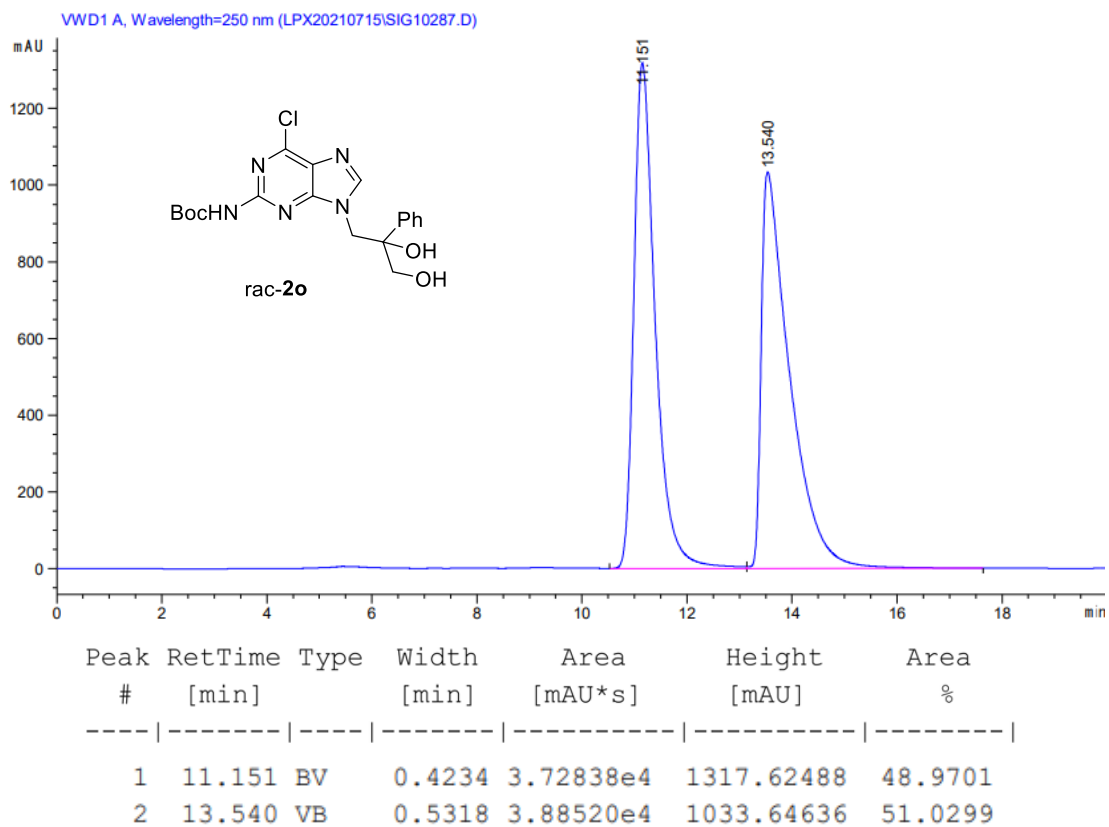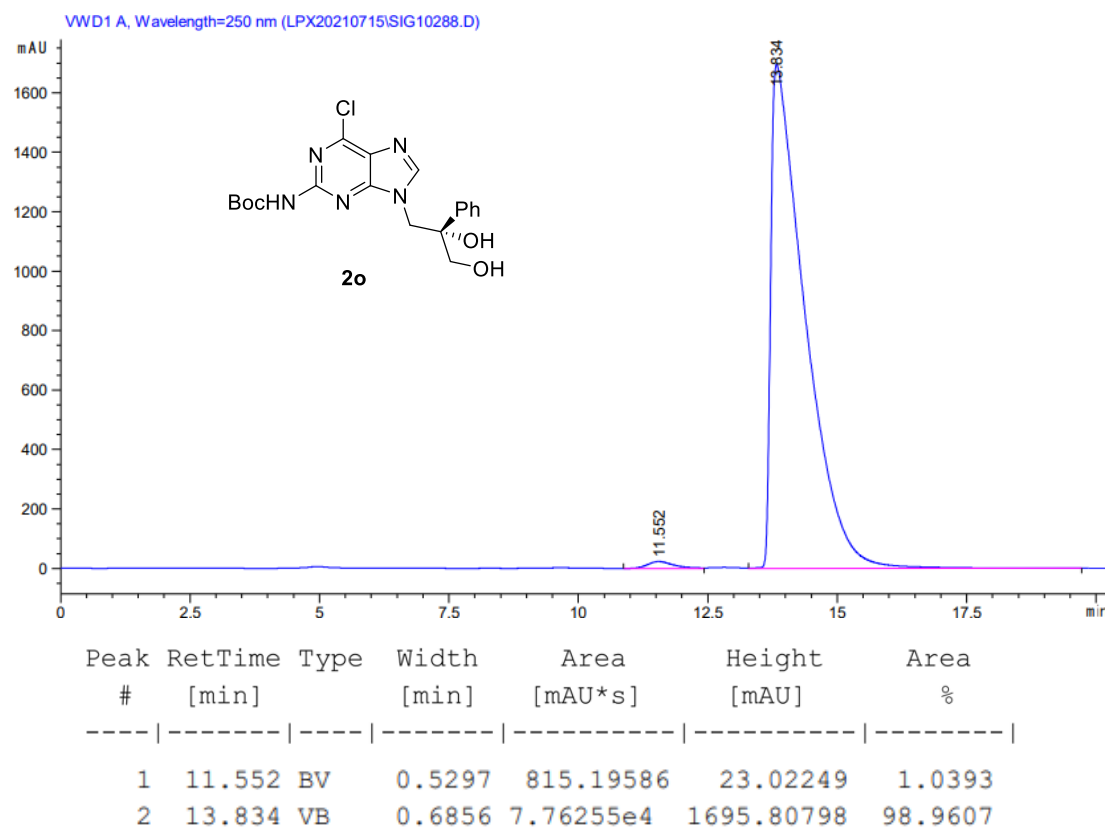

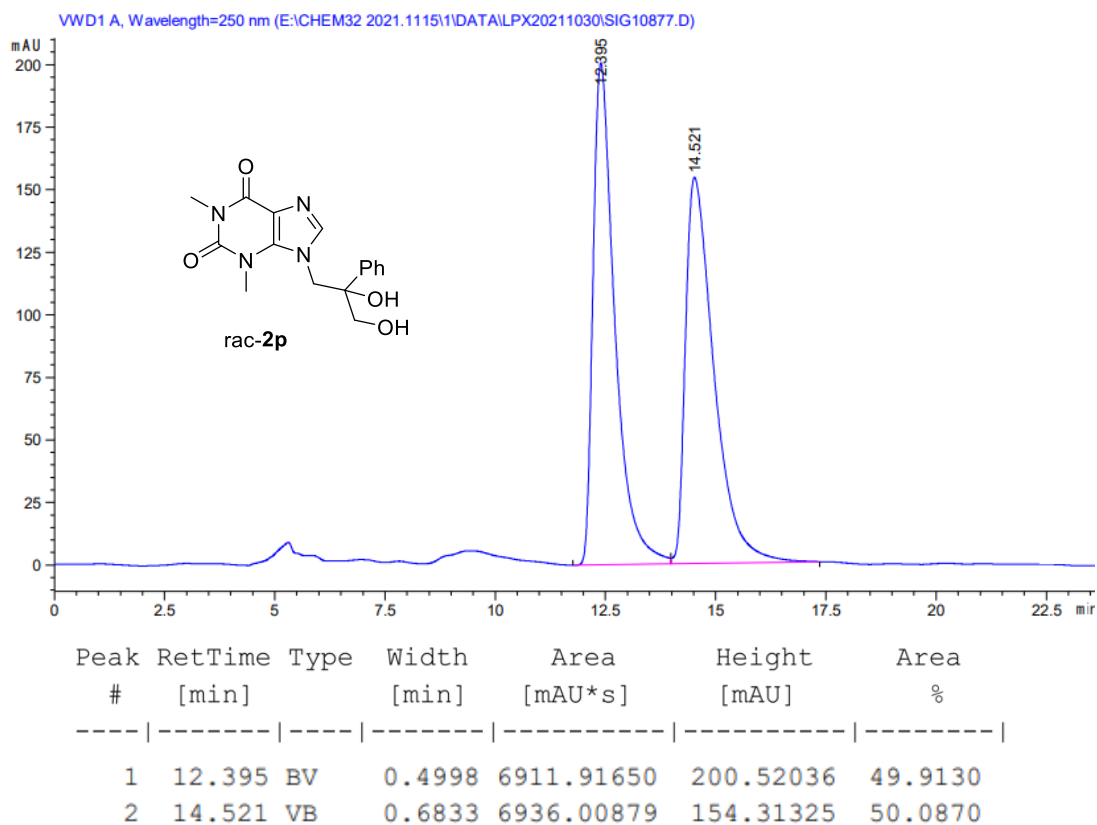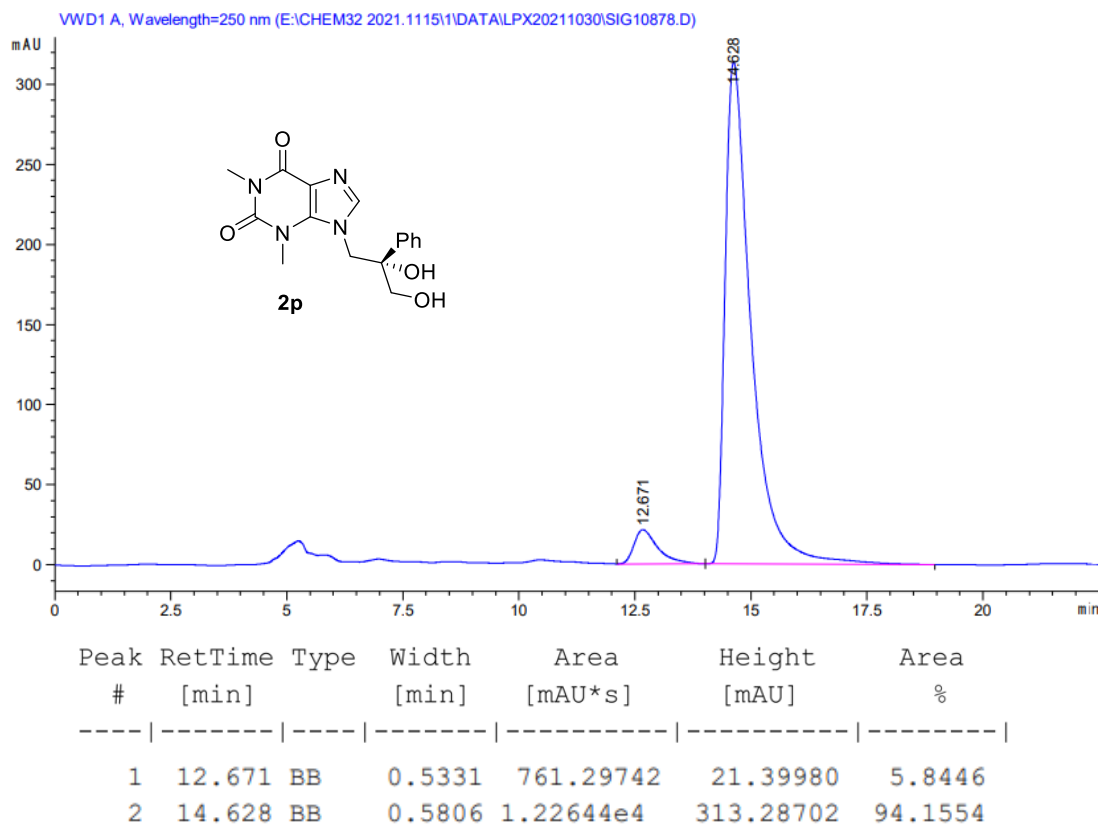

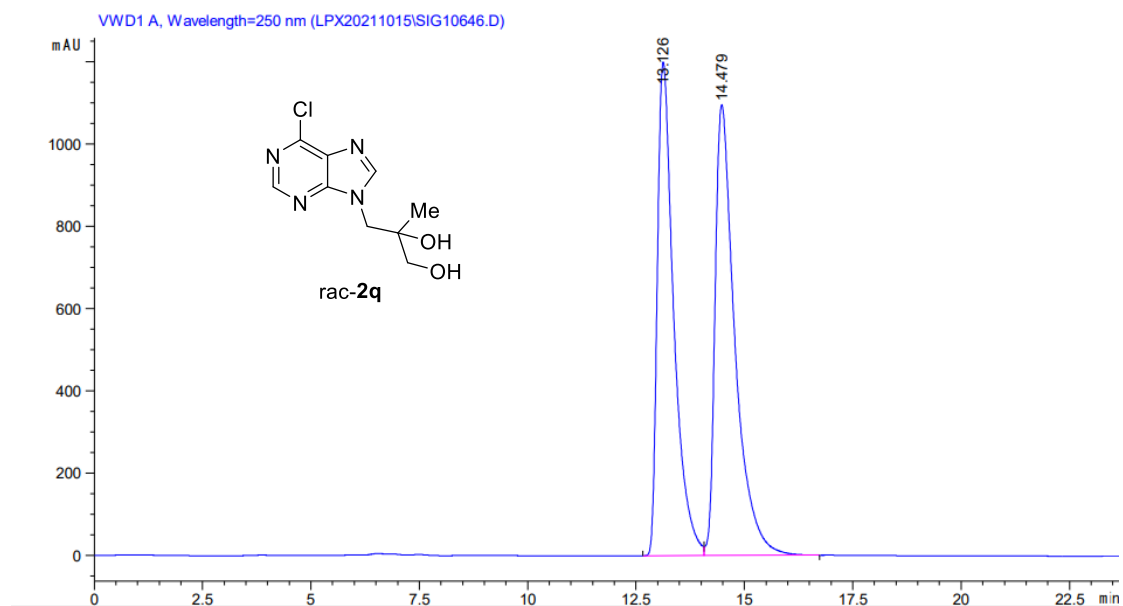

| Peak # | RetTime [min] | Type | Width [min] | Area [mAU*s] | Height [mAU] | Area %  |
|--------|---------------|------|-------------|--------------|--------------|---------|
| 1      | 13.126        | BV   | 0.3895      | 3.16624e4    | 1199.65710   | 47.5489 |
| 2      | 14.479        | VB   | 0.4737      | 3.49267e4    | 1096.47461   | 52.4511 |

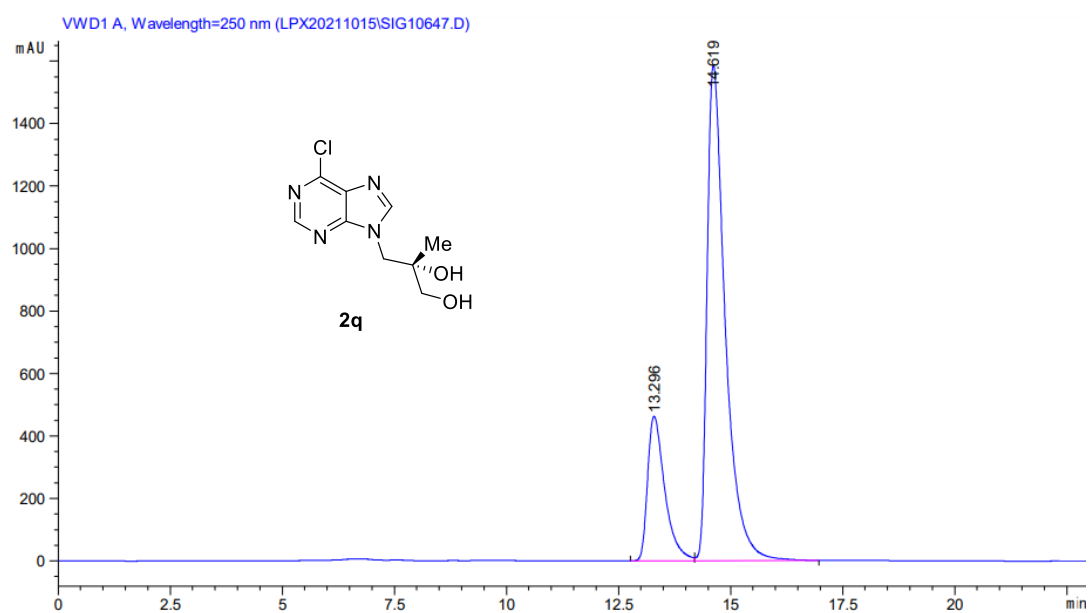

| Peak # | RetTime [min] | Type | Width [min] | Area [mAU*s] | Height [mAU] | Area %  |
|--------|---------------|------|-------------|--------------|--------------|---------|
| 1      | 13.296        | BV   | 0.4033      | 1.23562e4    | 462.89117    | 21.6555 |
| 2      | 14.619        | VB   | 0.4236      | 4.47018e4    | 1585.82190   | 78.3445 |

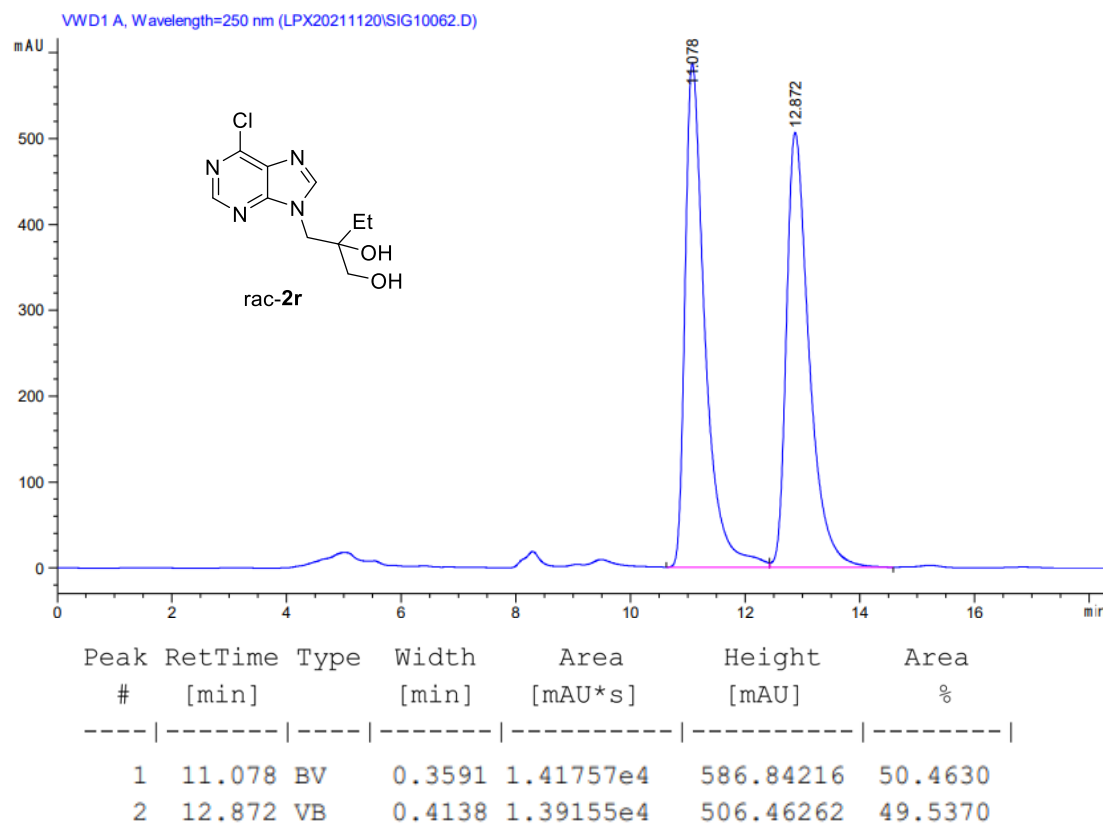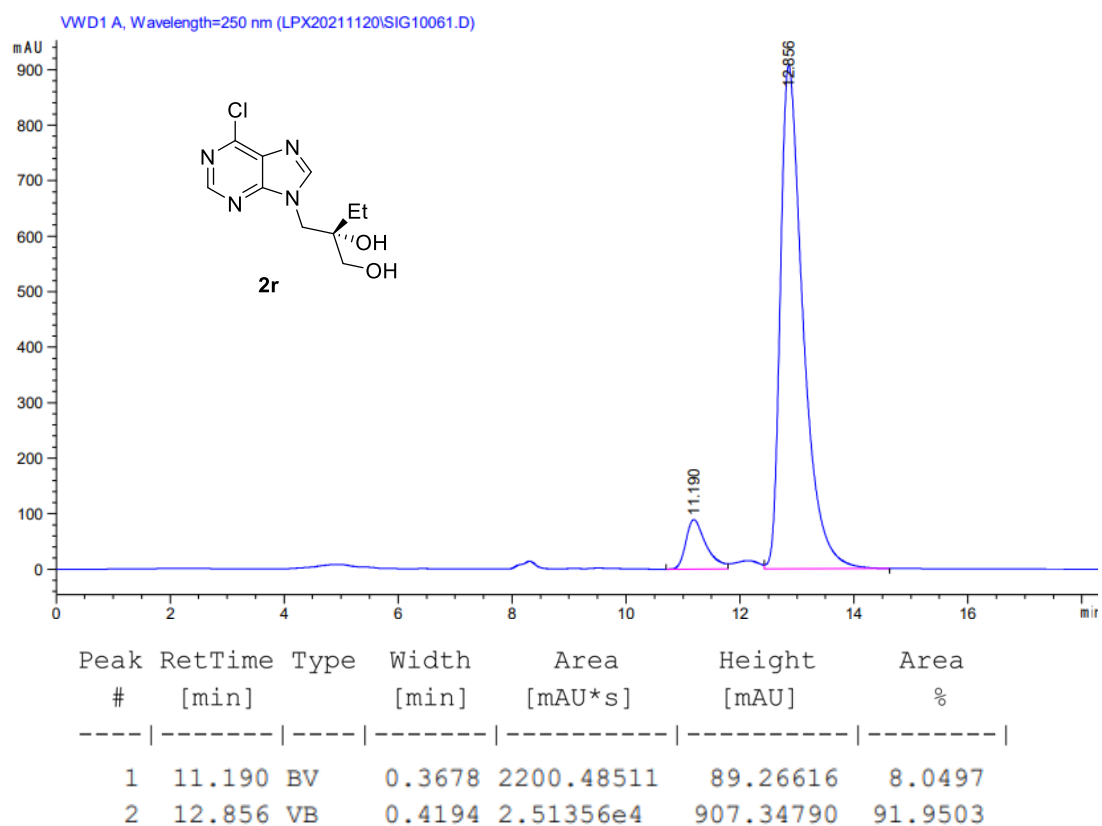

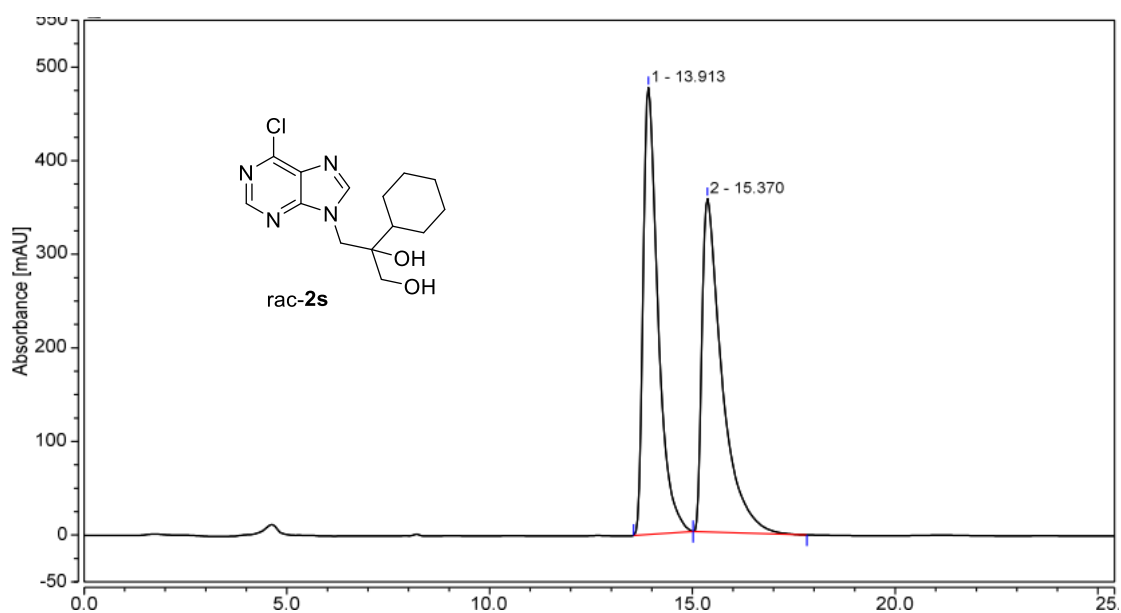

| Peak          | Retention Time<br>min | Area<br>mAU*min | Height<br>mAU  | Area<br>%     | Height<br>%   |
|---------------|-----------------------|-----------------|----------------|---------------|---------------|
| 1             | 13.913                | 203.332         | 477.435        | 49.94         | 57.27         |
| 2             | 15.370                | 203.801         | 356.205        | 50.06         | 42.73         |
| <b>Total:</b> |                       | <b>407.133</b>  | <b>833.640</b> | <b>100.00</b> | <b>100.00</b> |

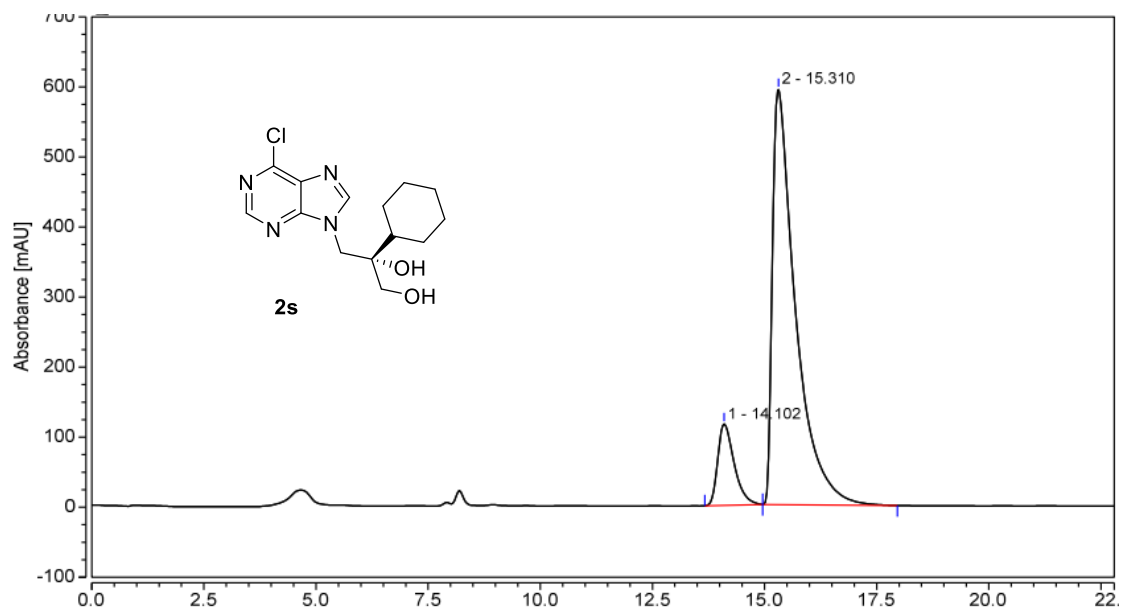

| Peak          | Retention Time<br>min | Area<br>mAU*min | Height<br>mAU  | Area<br>%     | Height<br>%   |
|---------------|-----------------------|-----------------|----------------|---------------|---------------|
| 1             | 14.102                | 49.529          | 116.176        | 12.26         | 16.39         |
| 2             | 15.310                | 354.383         | 592.584        | 87.74         | 83.61         |
| <b>Total:</b> |                       | <b>403.911</b>  | <b>708.760</b> | <b>100.00</b> | <b>100.00</b> |

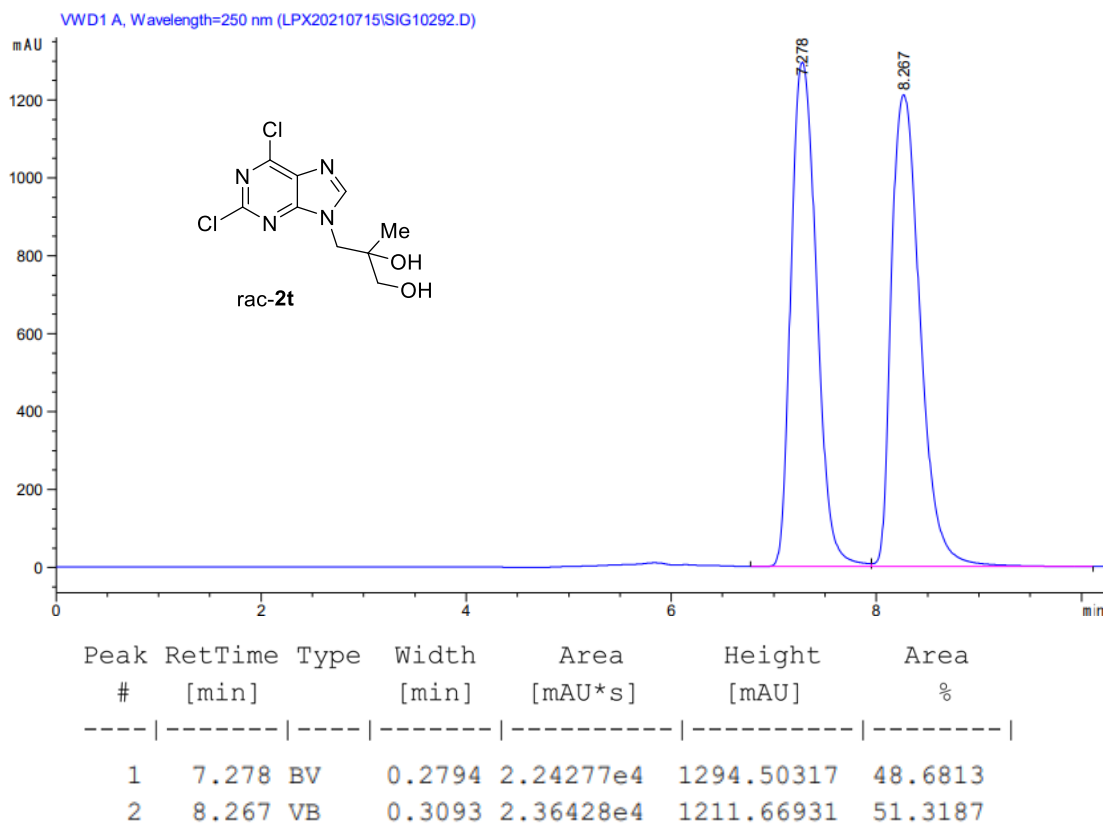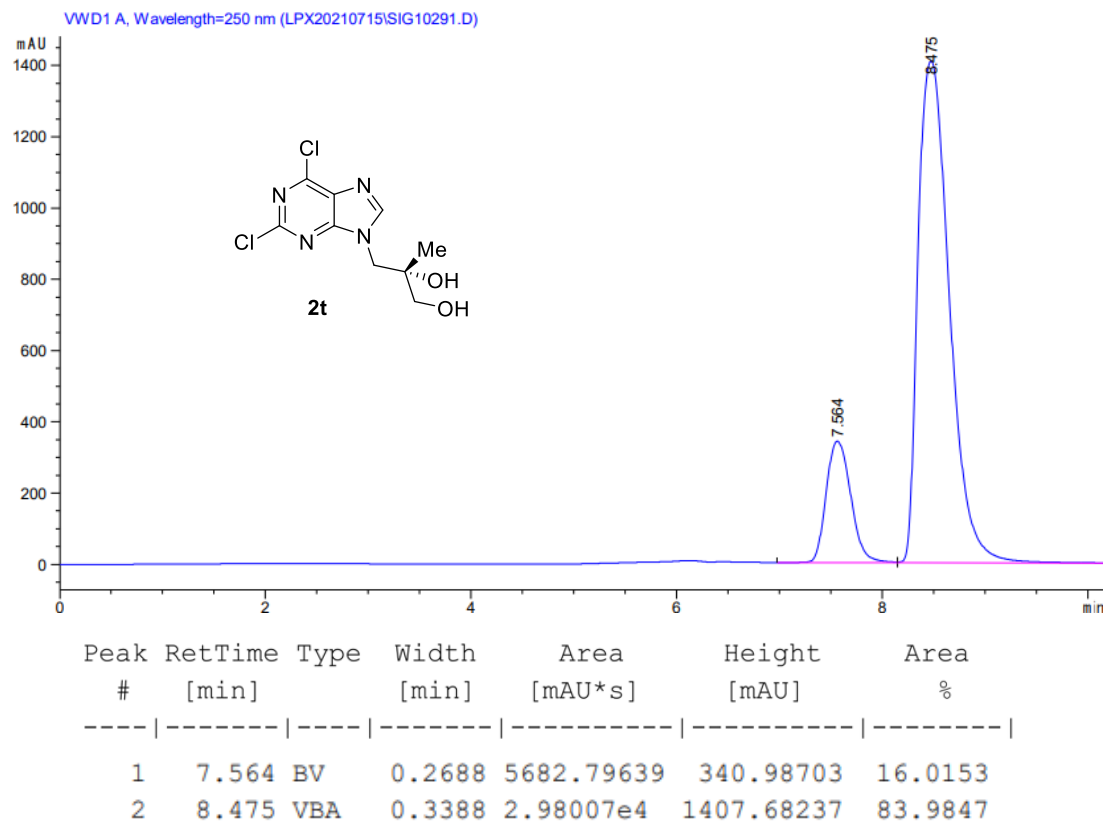

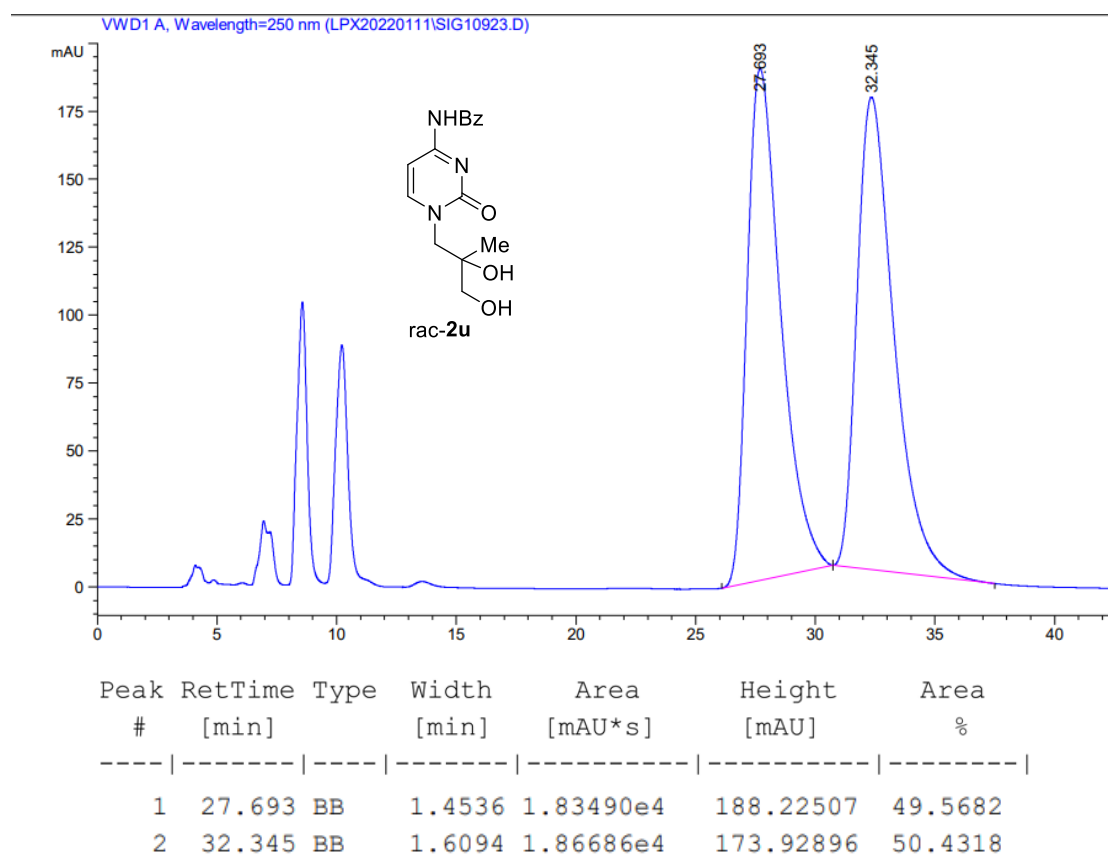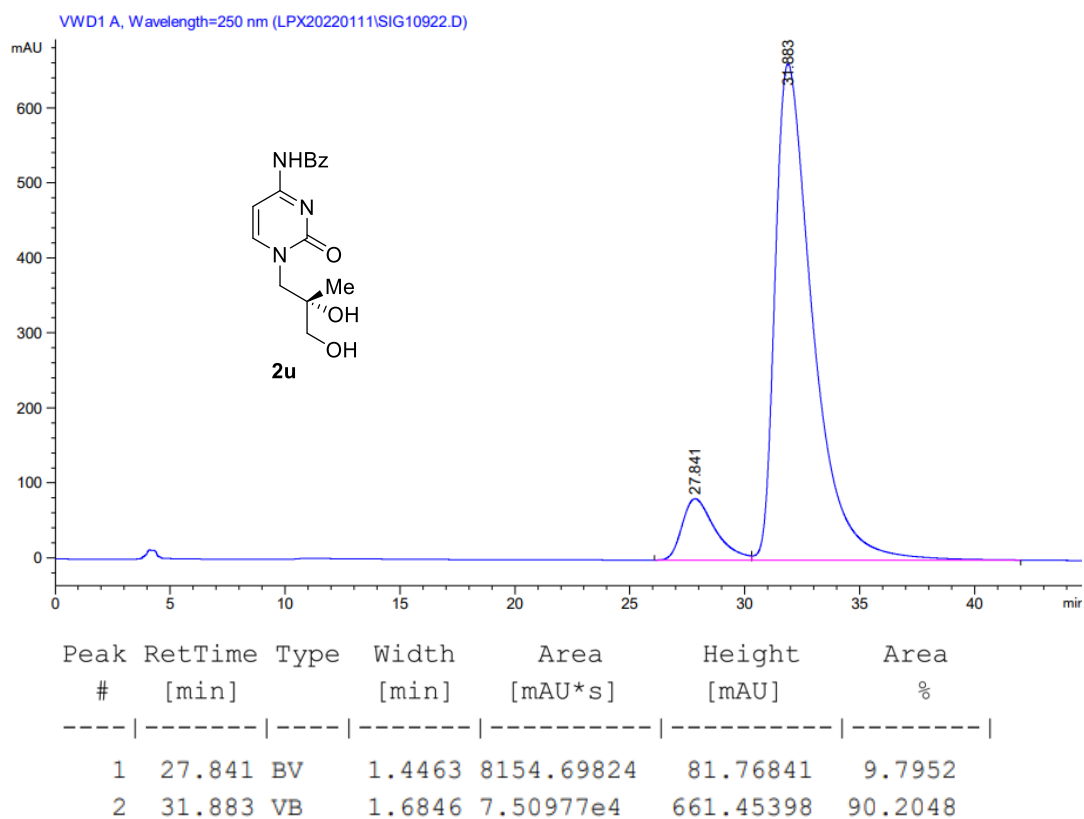

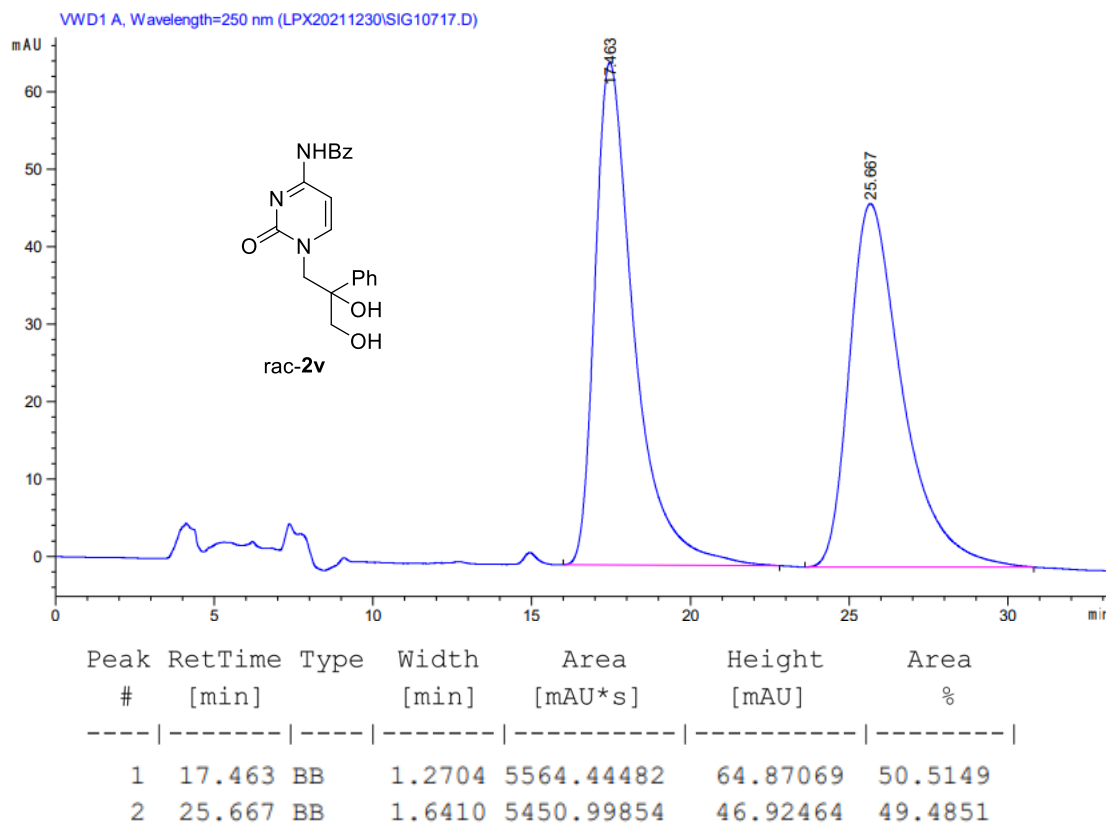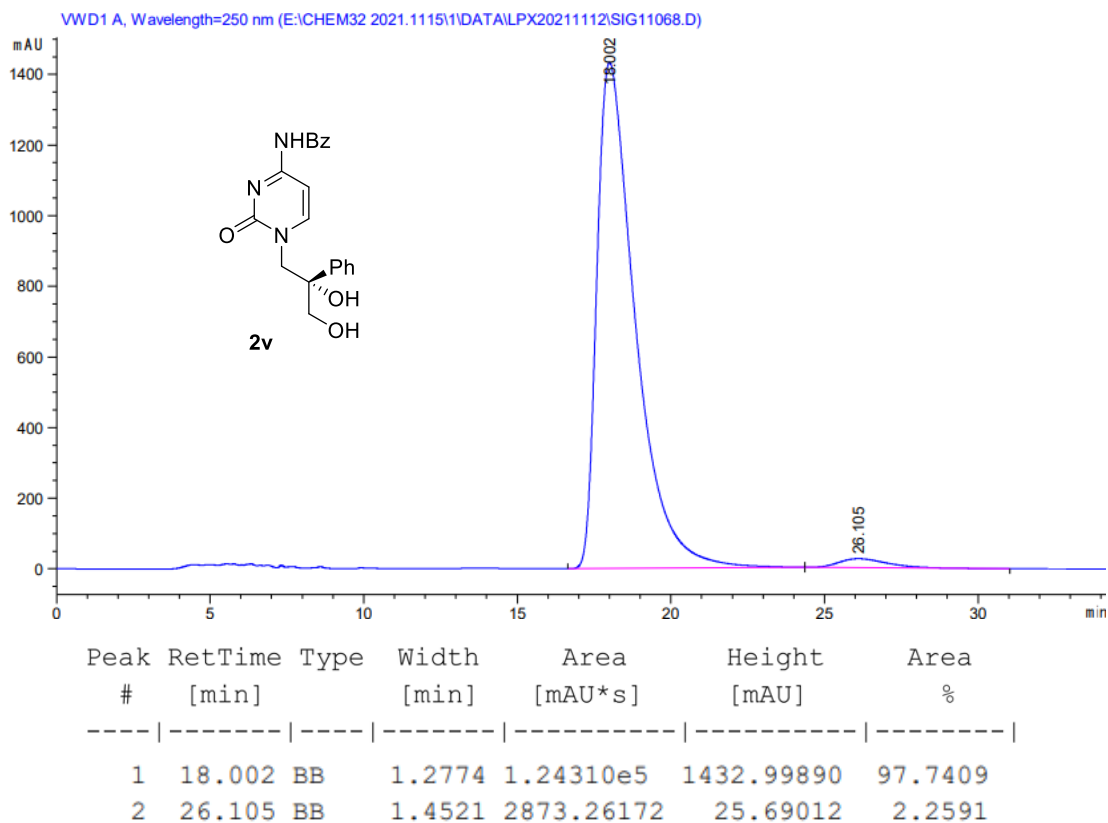

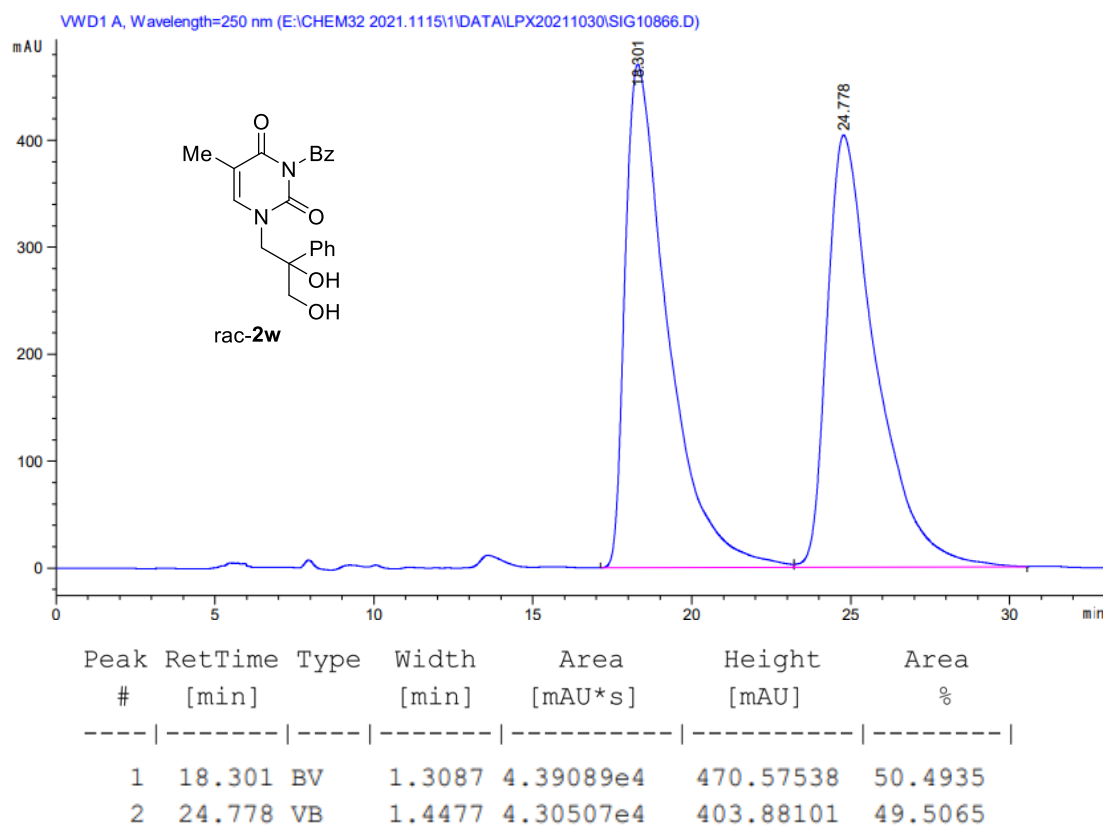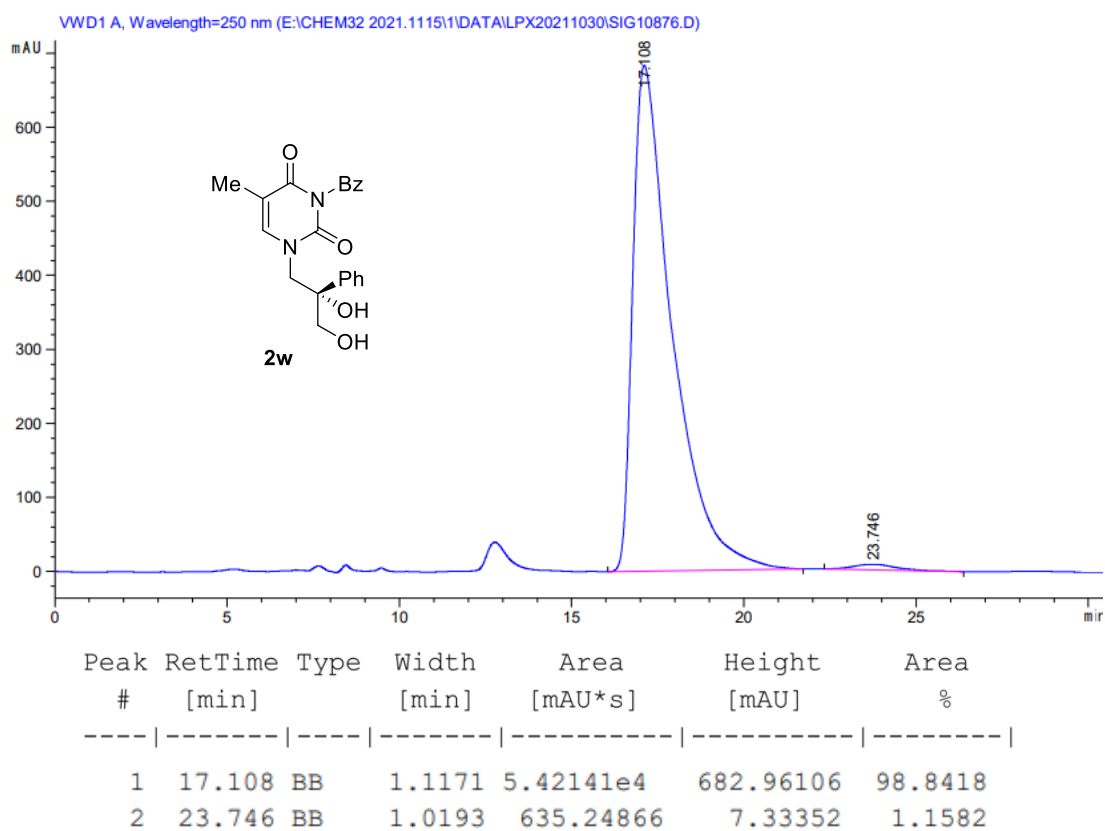

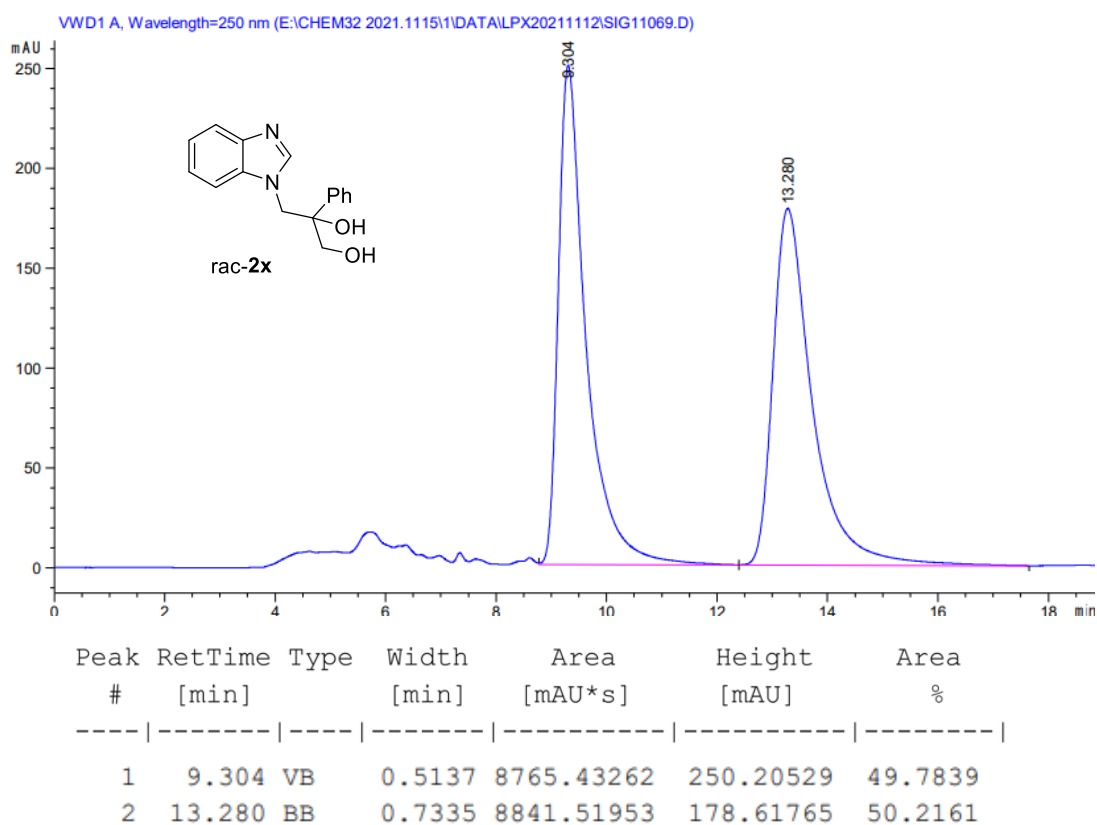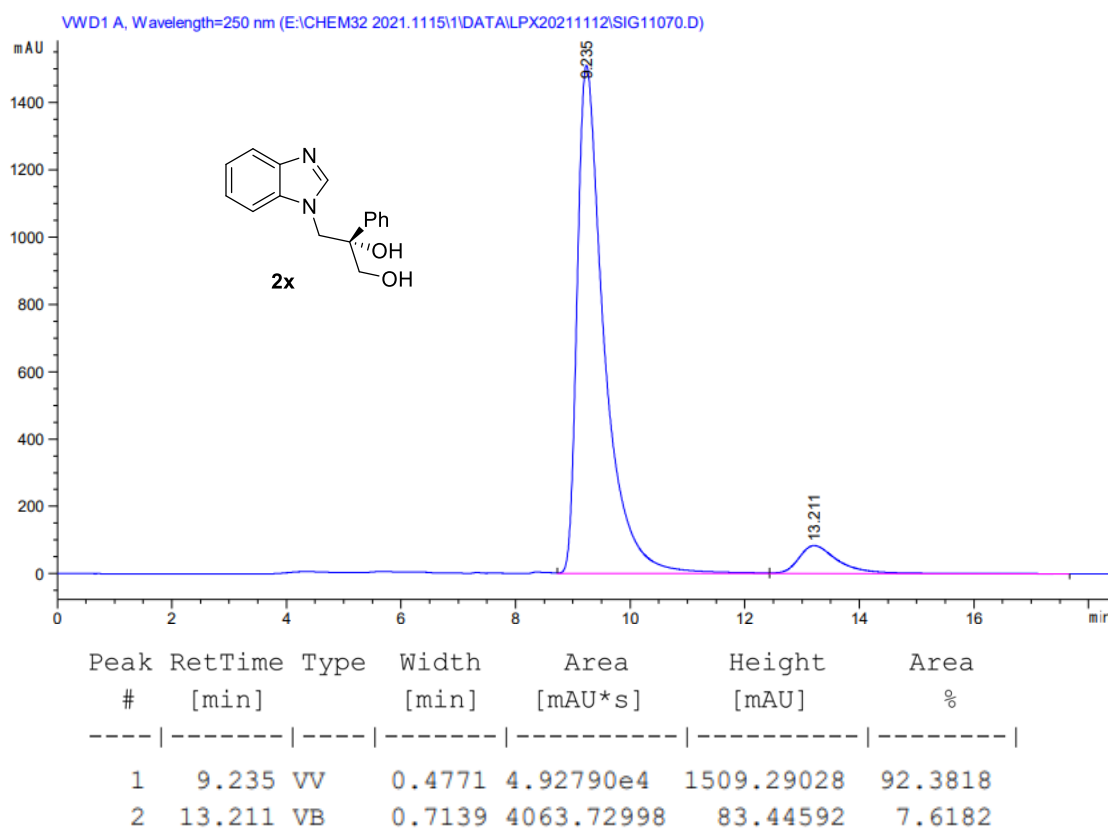

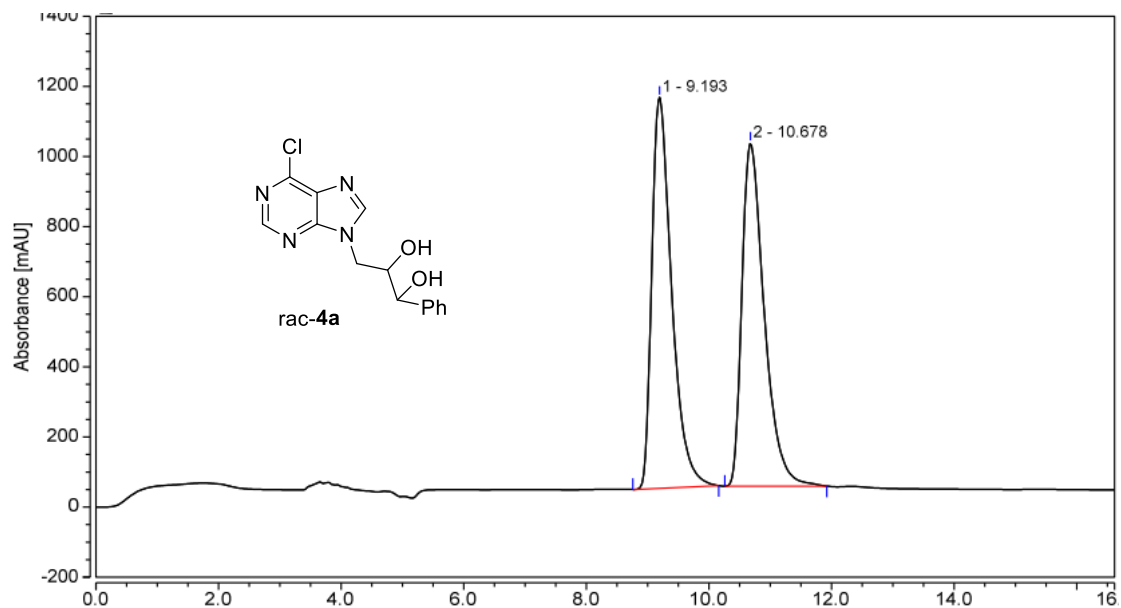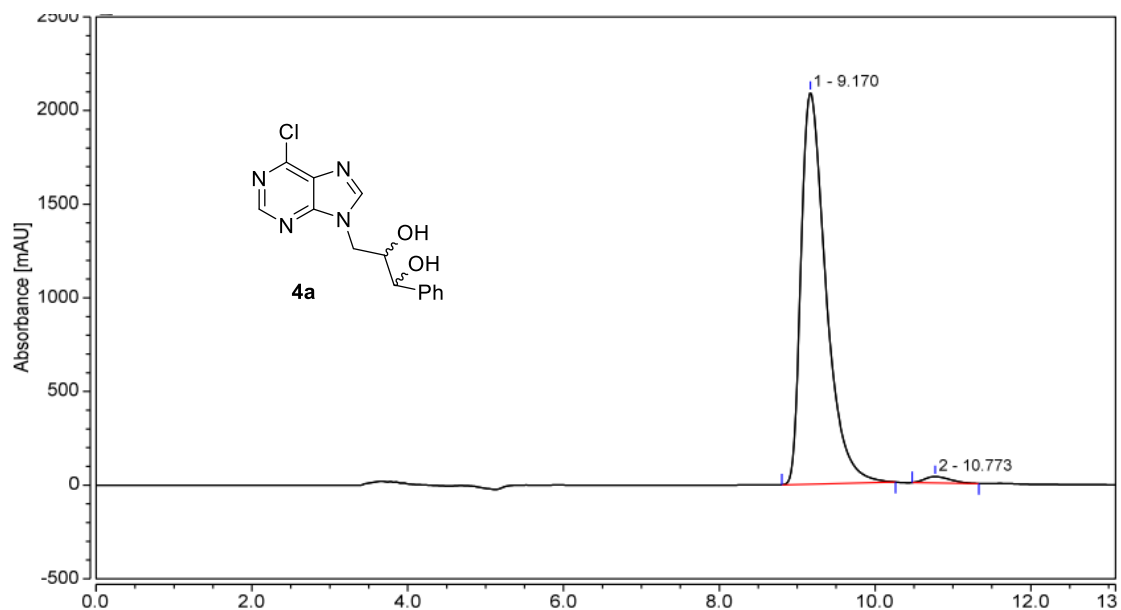

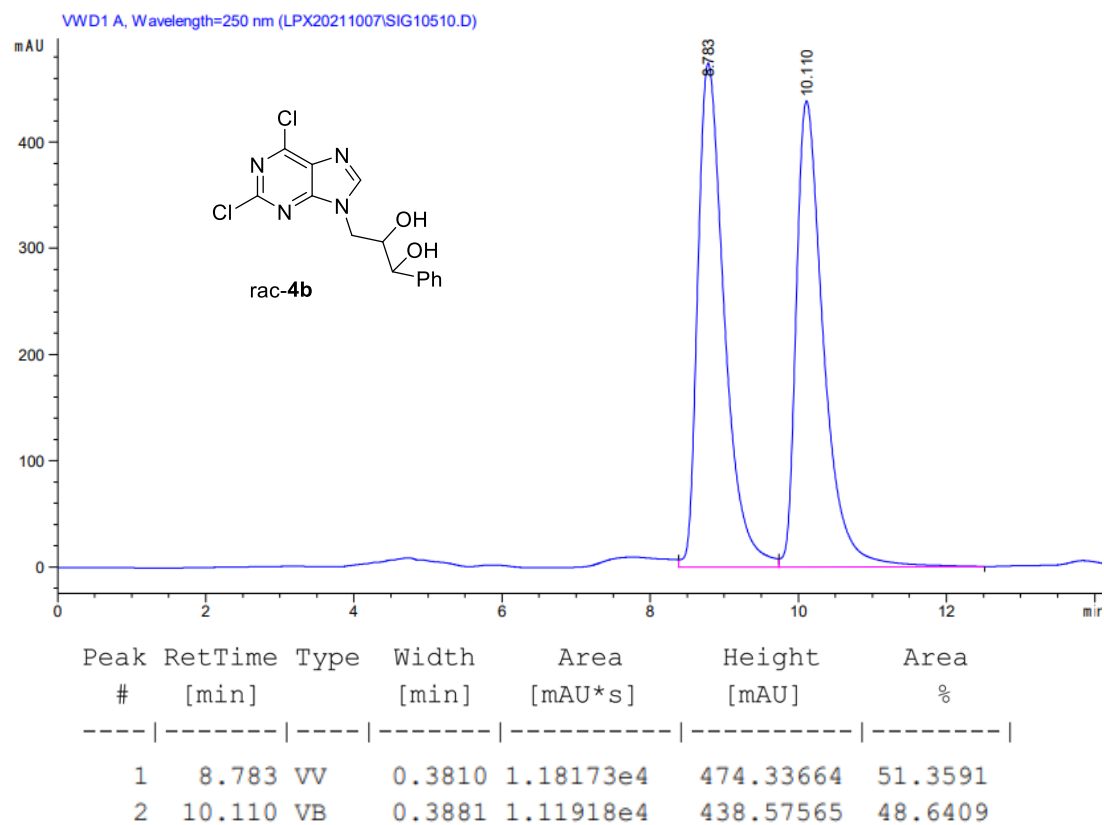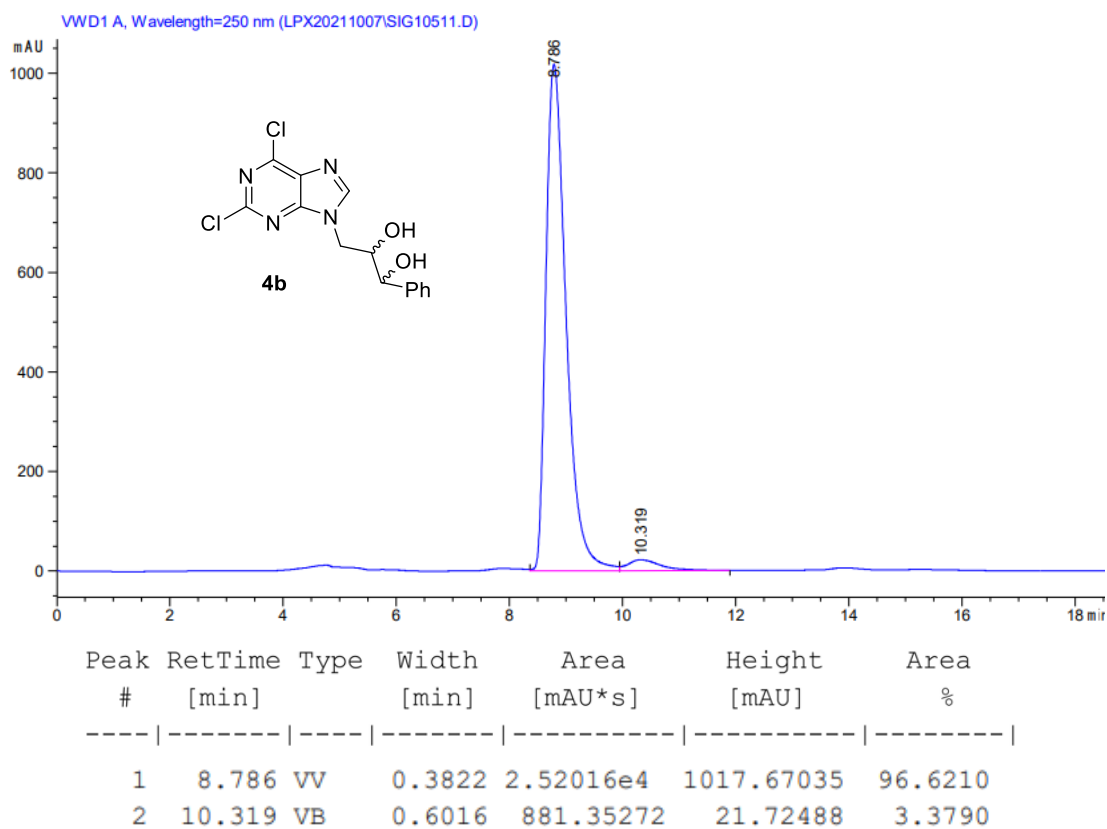

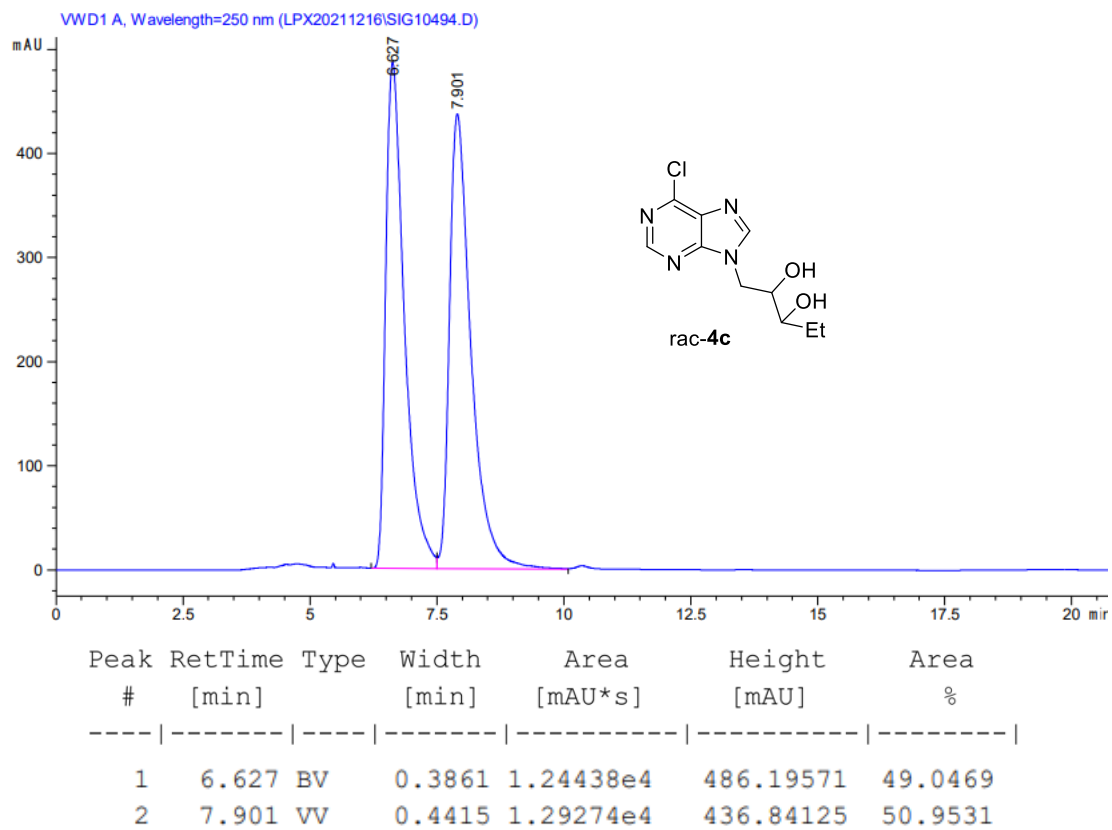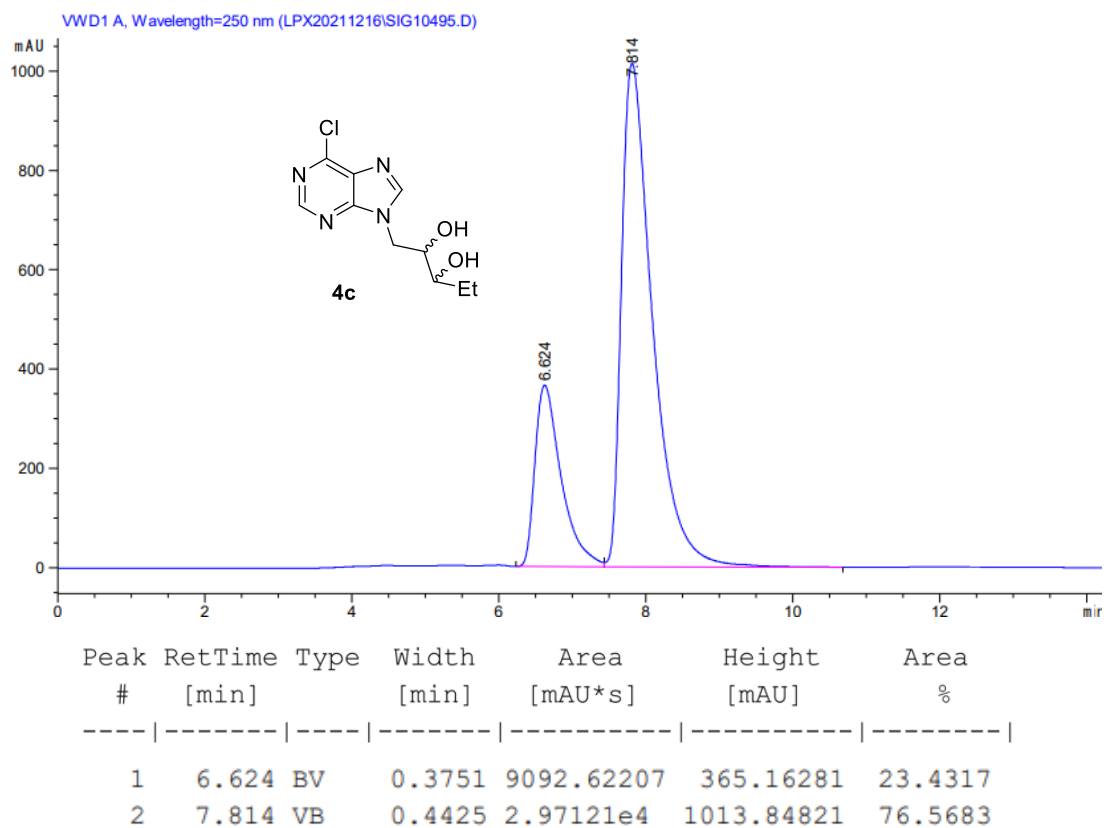

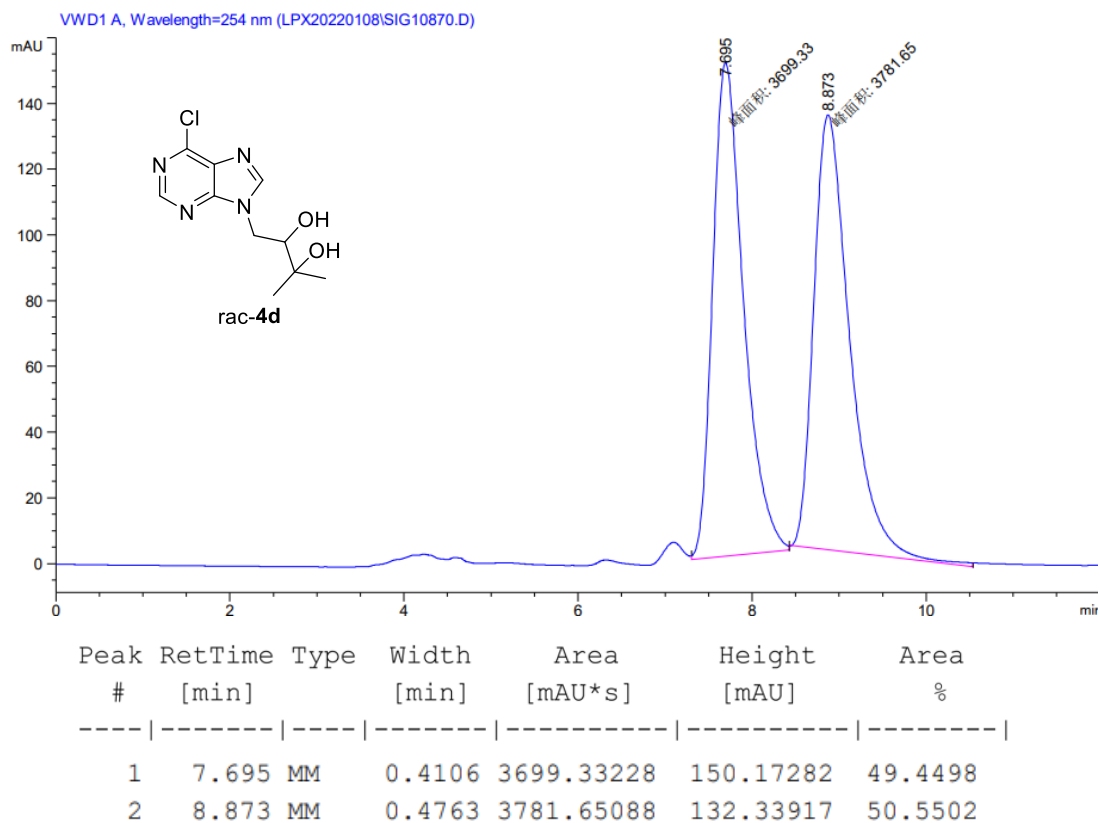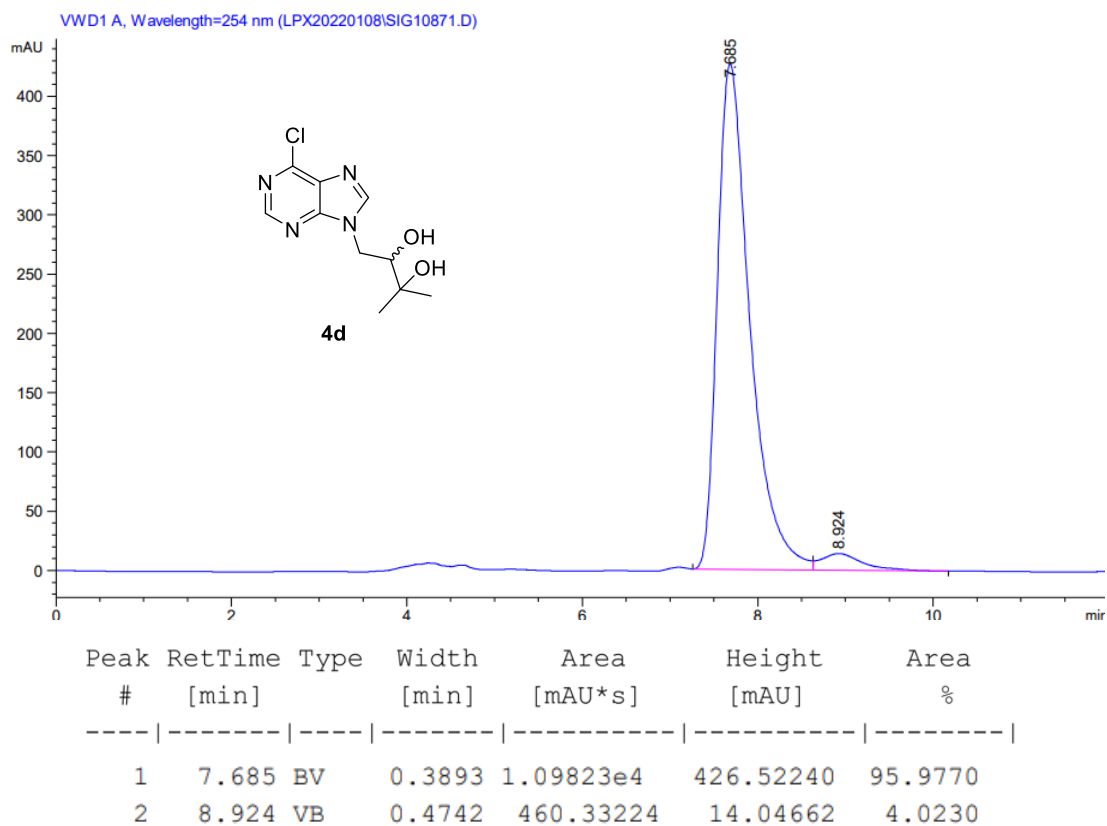

## 7. References

1. M. Kim, B. Park, M. Shin, S. Kim, J. Kim, M. H. Baik and S. H. Cho, Copper-catalyzed enantiotopic-group-selective allylation of *gem*-diborylalkanes, *J. Am. Chem. Soc.*, **2021**, *143*, 1069-1077.
2. J. Y. See, H. Yang, Y. Zhao, M. W. Wong, Z. Ke and Y. Y. Yeung, Desymmetrizing enantio- and diastereoselective selenoetherification through supramolecular catalysis, *ACS Catal.*, **2018**, *8*, 850-858.
3. J. Chen and T. Hayashi, Asymmetric synthesis of alkylzincs by rhodium-catalyzed enantioselective arylation cyclization of 1, 6-enynes with arylzincs, *Angew. Chem. Int. Ed.*, **2020**, *59*, 18510-18514.
4. K. Jindrich, L.-L. Gundersen, Synthesis of N-alkenylpurines by rearrangements of the corresponding N-allyl isomers: scopes and limitations, *Eur. J. Org. Chem.* **2013**, *10*, 2008-2019.
